# Supplementary material for: The oral bacterial microbiome of occlusal surfaces in children and its association with diet and caries
Source: PubMed Central journal article supplement (PMC5498058; doi:10.1371/journal.pone.0180621), 2017-07-05
Supplement: pone.0180621.s001.pdf [file pone.0180621.s001.pdf]

# The Oral Bacterial Microbiome of Occlusal Surfaces in Children and its Association with Diet And Caries

## S1 Fig. Semi-quantitative food-frequency questionnaire (QFASQ) form.

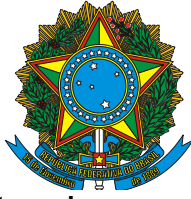

**UNIVERSIDADE FEDERAL FLUMINENSE**  
 PÓLO UNIVERSITÁRIO DE NOVA FRIBURGO  
 Faculdade de Odontologia – FOUFF/NF

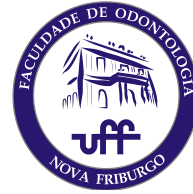

Patient number: \_\_\_\_\_

### SEMI-QUANTITATIVE FOOD-FREQUENCY QUESTIONNAIRE (QFASQ)

How many times did you eat these foods, during the last 6 months?

| FOODS                                | PORTION         | INTAKE |                        |                        |             |                     |            |                           |
|--------------------------------------|-----------------|--------|------------------------|------------------------|-------------|---------------------|------------|---------------------------|
|                                      |                 | Never  | Less than once a month | 1 to 3 times per month | Once a week | 2 to 4 times weekly | Once daily | Twice or more times daily |
| <b>Rice, Bread, Pasta, Potato</b>    |                 |        |                        |                        |             |                     |            |                           |
| Rice                                 | 3 soup spoons   |        |                        |                        |             |                     |            |                           |
| Mashed potato                        | 1 soup spoon    |        |                        |                        |             |                     |            |                           |
| French fries                         | 1 portion       |        |                        |                        |             |                     |            |                           |
| Bread                                | 1 unit          |        |                        |                        |             |                     |            |                           |
| Pasta                                | 1 portion       |        |                        |                        |             |                     |            |                           |
| Pizza                                | 1 slice         |        |                        |                        |             |                     |            |                           |
| Lamen                                | 1 portion       |        |                        |                        |             |                     |            |                           |
| “Pão de queijo”                      | 3 units         |        |                        |                        |             |                     |            |                           |
| <b>Grains</b>                        |                 |        |                        |                        |             |                     |            |                           |
| Beans                                | 3 soup spoons   |        |                        |                        |             |                     |            |                           |
| Soy                                  | 1 soup spoon    |        |                        |                        |             |                     |            |                           |
| Oatmeal                              | 1 soup spoon    |        |                        |                        |             |                     |            |                           |
| Breakfast cereals                    | 1 soup spoon    |        |                        |                        |             |                     |            |                           |
| <b>Sweets, salty snacks, goodies</b> |                 |        |                        |                        |             |                     |            |                           |
| Potato chips                         | 1 bag           |        |                        |                        |             |                     |            |                           |
| Popcorn                              | 1 bag           |        |                        |                        |             |                     |            |                           |
| Salty snacks                         | 1 bag           |        |                        |                        |             |                     |            |                           |
| Chocolate                            | 3 units         |        |                        |                        |             |                     |            |                           |
| Cookies                              | 4 units         |        |                        |                        |             |                     |            |                           |
| Candy                                | 1 unit          |        |                        |                        |             |                     |            |                           |
| Cake                                 | 1 slice         |        |                        |                        |             |                     |            |                           |
| Sugar                                | 1 tea spoon     |        |                        |                        |             |                     |            |                           |
| Chocolate flavored powder            | 1 ½ spoon       |        |                        |                        |             |                     |            |                           |
| Ice cream                            | 2 scoops/1 unit |        |                        |                        |             |                     |            |                           |
| Hot dog                              | 1 unit          |        |                        |                        |             |                     |            |                           |
| Burger                               | 1 unit          |        |                        |                        |             |                     |            |                           |
| Dessert                              | 1 portion       |        |                        |                        |             |                     |            |                           |
