# Supplementary material for: The oral bacterial microbiome of occlusal surfaces in children and its association with diet and caries
Source: PubMed Central journal article supplement (PMC5498058; doi:10.1371/journal.pone.0180621), 2017-07-05
Supplement: pone.0180621.s005.pdf [file pone.0180621.s005.pdf]

## The Oral Bacterial Microbiome of Occlusal Surfaces in Children and its Association with Diet And Caries

**S3 Table. Mean relative abundances (RA) of all species represented over 0.1%, by patient (Pat).**

| Relative abundance $\geq$ 0.1 |                                             | Patient # (DMFT; # of AWSL/ # of second molars) |                   |                   |                    |                   |                   |                   |                   |                    |                    |                    |                    |                    | Mean RA     |
|-------------------------------|---------------------------------------------|-------------------------------------------------|-------------------|-------------------|--------------------|-------------------|-------------------|-------------------|-------------------|--------------------|--------------------|--------------------|--------------------|--------------------|-------------|
| Taxon_ID                      | Species                                     | Pat 1<br>(9; 2/3)                               | Pat 2<br>(5; 3/4) | Pat 3<br>(5; 1/4) | Pat 4<br>(16; 4/4) | Pat 5<br>(0; 0/4) | Pat 6<br>(2; 2/4) | Pat 7<br>(5; 1/3) | Pat 8<br>(4; 2/4) | Pat 9<br>(13; 3/4) | Pat 10<br>(9; 2/4) | Pat 11<br>(3; 3/4) | Pat 12<br>(5; 1/1) | Pat 13<br>(6; 0/3) |             |
| GGT673;HOT736                 | <i>Granulicatella paradiacens</i>           | 8.7                                             | 10.2              | 7.4               | 33.2               | 18.3              | 10.0              | 11.9              | 24.1              | 22.7               | 17.9               | 8.2                | 5.5                | 16.8               | <b>15.1</b> |
| GGT1791;HOT578                | <i>Streptococcus mutans</i>                 | 12.1                                            | 2.3               | 0.4               | 8.5                | 4.7               | 0.7               | 2.2               | 5.5               | 11.3               | 2.7                | 6.3                | 3.7                | 31.1               | <b>7.1</b>  |
| GGT1534;HOT536                | <i>Pseudomonas sp._Oral_Taxon_C61</i>       | 0.0                                             | 0.0               | 0.0               | 0.0                | 0.0               | 0.0               | 43.3              | 0.0               | 0.0                | 17.4               | 0.0                | 23.7               | 0.0                | <b>6.5</b>  |
| HOTB66                        | <i>Streptococcus sp._str._C300</i>          | 4.3                                             | 13.1              | 7.8               | 4.9                | 11.5              | 4.9               | 0.4               | 9.2               | 4.9                | 1.3                | 2.4                | 9.1                | 3.6                | <b>6.0</b>  |
| GGT1758                       | <i>Streptococcus gordonii</i>               | 7.9                                             | 1.0               | 3.9               | 6.1                | 0.0               | 1.4               | 0.2               | 3.5               | 10.2               | 0.1                | 2.0                | 9.0                | 7.2                | <b>4.1</b>  |
| GGT866;HOT718;<br>HOT826      | <i>Lautropia mirabilis</i>                  | 2.7                                             | 20.2              | 2.0               | 2.6                | 1.3               | 5.5               | 2.1               | 4.8               | 3.1                | 0.6                | 3.7                | 0.1                | 2.2                | <b>3.9</b>  |
| GGT1806;HOT707                | <i>Streptococcus sanguinis</i>              | 0.9                                             | 4.5               | 2.2               | 3.9                | 1.9               | 5.5               | 1.4               | 5.0               | 3.0                | 2.8                | 1.3                | 0.2                | 4.5                | <b>2.9</b>  |
| GGT1352;HOT544                | <i>Pseudomonas putida</i> <sup>a</sup>      | 0.0                                             | 0.0               | 0.0               | 0.0                | 0.0               | 36.6              | 0.0               | 0.0               | 0.0                | 0.0                | 0.0                | 0.0                | 0.0                | <b>2.8</b>  |
| HOT660                        | <i>Escherichia coli</i> <sup>a</sup>        | 0.0                                             | 0.0               | 0.0               | 0.0                | 0.0               | 0.0               | 0.0               | 0.0               | 0.0                | 0.0                | 28.7               | 0.0                | 0.0                | <b>2.3</b>  |
| GGT1820                       | <i>Veillonella sp._Oral_Taxon_E53</i>       | 3.2                                             | 5.9               | 1.9               | 1.7                | 2.2               | 1.1               | 1.6               | 1.7               | 1.6                | 3.3                | 2.7                | 0.3                | 1.3                | <b>2.2</b>  |
| GGT1803;HOT622                | <i>Streptococcus oralis</i>                 | 0.0                                             | 0.3               | 0.1               | 4.7                | 0.0               | 15.2              | 0.1               | 0.1               | 3.0                | 0.0                | 2.9                | 0.0                | 0.0                | <b>2.1</b>  |
| HOT279                        | <i>Prevotella denticola</i>                 | 4.8                                             | 0.0               | 2.3               | 0.4                | 12.5              | 0.0               | 0.1               | 0.0               | 0.4                | 0.0                | 0.3                | 5.1                | 0.0                | <b>2.0</b>  |
| HOTG60                        | <i>Abiotrophia defectiva</i>                | 1.7                                             | 1.8               | 1.4               | 2.5                | 0.1               | 0.0               | 0.1               | 0.3               | 0.4                | 0.1                | 14.1               | 0.1                | 2.7                | <b>2.0</b>  |
| GGT1304;HOT598                | <i>Neisseria sicca</i>                      | 0.1                                             | 1.8               | 0.0               | 0.0                | 0.0               | 0.0               | 4.1               | 18.8              | 0.0                | 0.0                | 0.0                | 0.1                | 0.0                | <b>1.9</b>  |
| HOT215                        | <i>Acinetobacter baumannii</i> <sup>a</sup> | 0.0                                             | 0.0               | 22.6              | 0.0                | 0.0               | 0.0               | 0.0               | 0.0               | 0.0                | 0.0                | 0.0                | 0.0                | 0.0                | <b>1.8</b>  |
| GGT397;HOT633                 | <i>Enterobacter sp._str._638</i>            | 0.0                                             | 0.0               | 0.0               | 0.0                | 4.4               | 0.1               | 6.7               | 0.0               | 0.0                | 3.7                | 0.0                | 8.0                | 0.0                | <b>1.8</b>  |
| GGT1787;HOT398;<br>HOT677     | <i>Streptococcus pneumoniae</i>             | 0.2                                             | 0.9               | 0.2               | 0.4                | 0.0               | 0.2               | 3.5               | 0.4               | 12.7               | 3.1                | 0.1                | 0.1                | 0.0                | <b>1.7</b>  |
| GGT1822                       | <i>Veillonella parvula_group</i>            | 1.9                                             | 3.8               | 0.9               | 0.8                | 2.1               | 1.3               | 0.7               | 0.6               | 0.5                | 5.4                | 1.2                | 0.1                | 1.0                | <b>1.6</b>  |
| HOT768                        | <i>Streptococcus sp._Oral_Taxon_064</i>     | 0.1                                             | 0.1               | 0.1               | 10.4               | 0.1               | 1.1               | 0.0               | 6.0               | 0.1                | 0.0                | 0.0                | 0.6                | 0.2                | <b>1.5</b>  |
| HOT540                        | <i>Erwinia aphidicola</i> <sup>a</sup>      | 0.0                                             | 0.0               | 0.0               | 0.0                | 0.0               | 0.0               | 0.0               | 0.0               | 0.0                | 0.0                | 0.0                | 14.2               | 0.0                | <b>1.1</b>  |
| GGT1676;HOT151                | <i>Streptococcus cristatus</i>              | 0.6                                             | 1.9               | 2.6               | 0.6                | 0.4               | 0.3               | 1.4               | 0.6               | 1.3                | 0.1                | 2.0                | 0.3                | 1.9                | <b>1.1</b>  |
| GGT1799;HOT686                | <i>Streptococcus salivarius</i>             | 0.0                                             | 0.2               | 0.4               | 2.1                | 3.5               | 0.1               | 0.3               | 0.1               | 0.1                | 2.2                | 0.2                | 1.4                | 2.6                | <b>1.0</b>  |
| GGT1788;HOT576                | <i>Streptococcus mitis</i>                  | 0.2                                             | 0.3               | 2.9               | 0.6                | 1.2               | 1.2               | 0.5               | 1.1               | 0.6                | 0.6                | 1.4                | 2.3                | 0.3                | <b>1.0</b>  |

|                |                                              |      |     |     |     |     |     |     |     |     |     |     |     |     |            |
|----------------|----------------------------------------------|------|-----|-----|-----|-----|-----|-----|-----|-----|-----|-----|-----|-----|------------|
| HOT431         | <i>Streptococcus sp._str._2136FAA</i>        | 0.3  | 0.0 | 0.0 | 0.0 | 0.0 | 0.0 | 1.3 | 0.0 | 7.7 | 3.2 | 0.0 | 0.0 | 0.0 | <b>1.0</b> |
| HOT170         | <i>Actinomyces sp._Oral_Taxon_171</i>        | 0.1  | 4.8 | 0.1 | 1.4 | 2.6 | 0.1 | 0.0 | 0.0 | 0.1 | 2.6 | 0.5 | 0.1 | 0.2 | <b>1.0</b> |
| HOT058         | <i>Streptococcus sp._Oral_Taxon_071</i>      | 0.9  | 0.2 | 1.9 | 0.3 | 0.3 | 0.9 | 0.1 | 0.0 | 1.4 | 1.0 | 0.4 | 2.0 | 2.2 | <b>0.9</b> |
| GGT1484;HOT291 | <i>Prevotella melaninogenica</i>             | 7.5  | 0.3 | 1.1 | 0.8 | 0.1 | 0.2 | 0.1 | 0.1 | 0.1 | 0.0 | 0.1 | 0.1 | 0.2 | <b>0.8</b> |
| GGT1808;HOT644 | <i>Streptococcus parasanguinis_II</i>        | 0.0  | 0.1 | 0.5 | 0.8 | 0.3 | 0.1 | 0.2 | 0.9 | 0.2 | 3.2 | 0.1 | 0.3 | 3.9 | <b>0.8</b> |
| GGT1536;HOT612 | <i>Variovorax paradoxus<sup>a</sup></i>      | 10.3 | 0.0 | 0.0 | 0.0 | 0.0 | 0.0 | 0.0 | 0.0 | 0.0 | 0.0 | 0.0 | 0.0 | 0.0 | <b>0.8</b> |
| HOT169         | <i>Actinomyces sp._Oral_Taxon_170</i>        | 0.1  | 5.3 | 0.8 | 0.2 | 0.1 | 2.6 | 0.0 | 0.0 | 0.0 | 0.1 | 0.6 | 0.0 | 0.0 | <b>0.8</b> |
| GGT1002;HOT731 | <i>Neisseria mucosa</i>                      | 0.1  | 0.2 | 0.1 | 0.0 | 0.0 | 0.0 | 0.1 | 0.1 | 1.8 | 0.0 | 3.8 | 0.1 | 2.7 | <b>0.7</b> |
| GGT1300;HOT682 | <i>Pseudomonas antarctica<sup>a</sup></i>    | 0.0  | 0.0 | 0.0 | 0.0 | 0.0 | 0.0 | 0.0 | 0.0 | 0.0 | 8.8 | 0.0 | 0.0 | 0.0 | <b>0.7</b> |
| GGT1795;HOT755 | <i>Streptococcus sp._Oral_Taxon_058</i>      | 0.0  | 0.5 | 0.5 | 0.1 | 1.6 | 0.0 | 1.4 | 0.2 | 0.3 | 0.0 | 0.8 | 0.4 | 2.3 | <b>0.6</b> |
| HOT446         | <i>Actinomyces sp._Oral_Taxon_448</i>        | 0.1  | 0.3 | 0.6 | 2.5 | 0.0 | 0.2 | 0.3 | 0.2 | 1.8 | 1.1 | 0.6 | 0.0 | 0.0 | <b>0.6</b> |
| GGT1811;HOT721 | <i>Streptococcus sobrinus</i>                | 0.0  | 0.6 | 0.0 | 0.0 | 0.0 | 0.0 | 0.0 | 0.0 | 0.0 | 6.0 | 0.0 | 1.0 | 0.0 | <b>0.6</b> |
| GGT1818;HOT021 | <i>Fusobacterium nucleatum_ss_animalis</i>   | 5.8  | 0.0 | 1.2 | 0.0 | 0.1 | 0.0 | 0.0 | 0.0 | 0.0 | 0.0 | 0.0 | 0.1 | 0.0 | <b>0.6</b> |
| HOT893         | <i>Actinomyces sp._Oral_Taxon_169</i>        | 0.6  | 0.5 | 0.0 | 0.1 | 0.6 | 0.1 | 0.0 | 0.9 | 1.0 | 0.5 | 0.4 | 0.1 | 2.1 | <b>0.5</b> |
| HOTA58         | <i>Campylobacter gracilis</i>                | 1.2  | 0.1 | 0.9 | 0.3 | 1.6 | 0.7 | 0.3 | 0.2 | 0.6 | 0.5 | 0.1 | 0.1 | 0.0 | <b>0.5</b> |
| GGT706;HOT577  | <i>Haemophilus parainfluenzae</i>            | 0.5  | 2.7 | 0.4 | 0.0 | 0.0 | 0.1 | 0.2 | 1.0 | 0.1 | 0.4 | 0.4 | 0.0 | 0.2 | <b>0.5</b> |
| HOTC21         | <i>Neisseria flavescens subflava</i>         | 0.0  | 1.1 | 0.4 | 0.1 | 0.0 | 0.0 | 1.1 | 2.5 | 0.0 | 0.0 | 0.2 | 0.0 | 0.2 | <b>0.4</b> |
| HOT057         | <i>Streptococcus sp._Oral_Taxon_070</i>      | 0.4  | 0.0 | 4.1 | 0.1 | 0.1 | 0.0 | 0.0 | 0.2 | 0.0 | 0.0 | 0.0 | 0.4 | 0.3 | <b>0.4</b> |
| HOT056         | <i>Streptococcus sp._Oral_Taxon_065</i>      | 0.0  | 0.4 | 0.4 | 0.3 | 0.1 | 0.1 | 0.9 | 0.6 | 0.0 | 0.2 | 0.1 | 0.0 | 2.4 | <b>0.4</b> |
| GGT1;HOT534    | <i>Lactobacillus delbrueckii<sup>a</sup></i> | 0.0  | 0.0 | 0.0 | 0.0 | 0.0 | 0.0 | 0.0 | 0.0 | 0.0 | 5.0 | 0.0 | 0.0 | 0.0 | <b>0.4</b> |
| GGT1023        | <i>Lactobacillus paracasei</i>               | 0.0  | 0.0 | 0.0 | 0.0 | 4.6 | 0.0 | 0.0 | 0.1 | 0.0 | 0.0 | 0.0 | 0.0 | 0.2 | <b>0.4</b> |
| HOT283         | <i>Porphyromonas sp._Oral_Taxon_279</i>      | 0.1  | 0.1 | 0.5 | 0.0 | 0.0 | 0.1 | 1.2 | 1.5 | 0.0 | 0.0 | 0.7 | 0.0 | 0.1 | <b>0.3</b> |
| HOTD12         | <i>Propionibacterium acidifaciens</i>        | 0.0  | 0.1 | 0.1 | 1.5 | 0.0 | 0.0 | 0.1 | 0.1 | 2.2 | 0.3 | 0.0 | 0.0 | 0.0 | <b>0.3</b> |
| HOT175         | <i>Actinomyces sp._Oral_Taxon_180</i>        | 0.7  | 1.2 | 1.4 | 0.0 | 0.2 | 0.1 | 0.0 | 0.4 | 0.0 | 0.0 | 0.1 | 0.1 | 0.0 | <b>0.3</b> |
| GGT155;HOT723  | <i>Corynebacterium matruchotii</i>           | 0.0  | 1.0 | 0.3 | 0.5 | 0.2 | 0.0 | 0.8 | 0.3 | 0.2 | 0.0 | 0.7 | 0.0 | 0.2 | <b>0.3</b> |
| HOTC61         | <i>TM7_[G-1] sp._Oral_Taxon_346</i>          | 0.4  | 0.1 | 0.8 | 0.0 | 1.6 | 0.0 | 0.3 | 0.0 | 0.0 | 0.0 | 0.0 | 0.9 | 0.0 | <b>0.3</b> |
| HOT284         | <i>Prevotella histicola</i>                  | 1.8  | 0.1 | 0.0 | 0.3 | 0.0 | 0.1 | 0.0 | 0.4 | 0.1 | 0.1 | 0.3 | 0.0 | 0.8 | <b>0.3</b> |
| HOT203         | <i>Leptotrichia sp._AF189244.1</i>           | 0.1  | 0.4 | 0.2 | 0.3 | 0.4 | 0.1 | 0.1 | 0.2 | 0.1 | 0.0 | 1.9 | 0.0 | 0.2 | <b>0.3</b> |
| GGT1485;HOT311 | <i>Prevotella salivae</i>                    | 0.8  | 0.1 | 0.8 | 0.3 | 1.2 | 0.0 | 0.0 | 0.1 | 0.0 | 0.0 | 0.1 | 0.3 | 0.0 | <b>0.3</b> |
| GGT1498;HOT466 | <i>Capnocytophaga gingivalis</i>             | 0.1  | 0.2 | 0.2 | 0.0 | 1.5 | 0.4 | 0.8 | 0.1 | 0.0 | 0.0 | 0.2 | 0.0 | 0.0 | <b>0.3</b> |
| HOT183         | <i>Actinobaculum sp._Oral_Taxon_183</i>      | 0.0  | 0.0 | 0.1 | 0.9 | 0.0 | 0.8 | 0.1 | 0.0 | 1.6 | 0.0 | 0.0 | 0.0 | 0.0 | <b>0.3</b> |
| GGT1078;HOT224 | <i>Leptotrichia sp._Oral_Taxon_417</i>       | 0.2  | 0.4 | 0.9 | 0.0 | 0.2 | 0.1 | 1.1 | 0.1 | 0.0 | 0.0 | 0.5 | 0.0 | 0.1 | <b>0.3</b> |
| HOT065         | <i>Streptococcus sp._Oral_Taxon_B66</i>      | 0.0  | 0.7 | 0.0 | 0.1 | 1.7 | 0.0 | 0.2 | 0.0 | 0.0 | 0.0 | 0.7 | 0.0 | 0.0 | <b>0.3</b> |

|                |                                               |     |     |     |     |     |     |     |     |     |     |     |     |     |            |
|----------------|-----------------------------------------------|-----|-----|-----|-----|-----|-----|-----|-----|-----|-----|-----|-----|-----|------------|
| HOTE75         | <i>Actinomyces viscosus</i>                   | 1.4 | 0.2 | 0.2 | 0.4 | 0.1 | 0.0 | 0.1 | 0.0 | 0.5 | 0.0 | 0.3 | 0.0 | 0.2 | <b>0.3</b> |
| GGT1075        | <i>Leptotrichia wadei</i>                     | 0.2 | 0.4 | 0.5 | 0.1 | 1.6 | 0.0 | 0.0 | 0.0 | 0.1 | 0.0 | 0.3 | 0.0 | 0.0 | <b>0.2</b> |
| GGT1681;HOT130 | <i>Streptococcus anginosus</i>                | 1.9 | 0.0 | 0.5 | 0.0 | 0.0 | 0.1 | 0.0 | 0.0 | 0.0 | 0.0 | 0.0 | 0.5 | 0.0 | <b>0.2</b> |
| GGT1625;HOT188 | <i>Scardovia wiggisiae</i>                    | 0.2 | 0.1 | 0.0 | 0.6 | 0.1 | 0.1 | 0.0 | 0.2 | 0.2 | 1.0 | 0.0 | 0.2 | 0.3 | <b>0.2</b> |
| HOTE63         | <i>Actinomyces sp._Oral_Taxon_E75</i>         | 0.3 | 0.0 | 0.0 | 0.0 | 0.0 | 0.1 | 0.0 | 0.7 | 0.0 | 0.0 | 0.0 | 1.8 | 0.0 | <b>0.2</b> |
| GGT53;HOT701   | <i>Actinomyces oris</i>                       | 0.0 | 2.3 | 0.0 | 0.1 | 0.0 | 0.0 | 0.0 | 0.0 | 0.0 | 0.0 | 0.2 | 0.0 | 0.0 | <b>0.2</b> |
| GGT1077;HOT214 | <i>Leptotrichia sp._Oral_Taxon_498</i>        | 0.0 | 0.0 | 0.2 | 0.0 | 2.4 | 0.0 | 0.0 | 0.0 | 0.0 | 0.0 | 0.0 | 0.0 | 0.0 | <b>0.2</b> |
| HOT191         | <i>Rothia dentocariosa</i>                    | 0.0 | 0.2 | 0.3 | 0.6 | 0.0 | 0.0 | 0.0 | 0.1 | 0.5 | 0.3 | 0.3 | 0.0 | 0.2 | <b>0.2</b> |
| GGT999;HOT706  | <i>Neisseria flava</i>                        | 1.2 | 0.1 | 0.0 | 0.1 | 0.0 | 0.0 | 0.0 | 1.1 | 0.0 | 0.0 | 0.0 | 0.0 | 0.0 | <b>0.2</b> |
| HOT121         | <i>Gemella morbillorum</i>                    | 0.1 | 0.0 | 1.4 | 0.0 | 0.0 | 0.0 | 0.0 | 0.3 | 0.0 | 0.0 | 0.3 | 0.0 | 0.0 | <b>0.2</b> |
| HOT885         | <i>Prevotella sp._Oral_Taxon_317</i>          | 0.0 | 0.0 | 1.0 | 0.0 | 0.4 | 0.8 | 0.0 | 0.0 | 0.0 | 0.0 | 0.0 | 0.0 | 0.0 | <b>0.2</b> |
| HOT275         | <i>Porphyromonas sp._Oral_Taxon_284</i>       | 0.0 | 0.6 | 0.3 | 0.0 | 0.0 | 0.0 | 0.0 | 0.0 | 0.0 | 0.0 | 1.1 | 0.0 | 0.1 | <b>0.2</b> |
| GGT1789;HOT758 | <i>Streptococcus sp._Oral_Taxon_061</i>       | 0.0 | 0.1 | 0.1 | 0.1 | 0.1 | 0.1 | 0.5 | 0.1 | 0.2 | 0.0 | 0.1 | 0.1 | 0.7 | <b>0.2</b> |
| GGT1989;HOT524 | <i>Fusobacterium nucleatum_ss_polymorphum</i> | 0.0 | 0.1 | 0.3 | 0.0 | 0.3 | 0.2 | 0.3 | 0.5 | 0.2 | 0.0 | 0.1 | 0.0 | 0.1 | <b>0.2</b> |
| GGT1815;HOT073 | <i>Streptococcus intermedius</i>              | 0.4 | 0.0 | 0.0 | 0.0 | 0.7 | 0.0 | 0.0 | 0.0 | 0.0 | 0.1 | 0.0 | 0.8 | 0.0 | <b>0.2</b> |
| HOT494         | <i>Lactobacillus fermentum</i>                | 0.0 | 0.0 | 0.0 | 0.2 | 0.0 | 0.0 | 0.0 | 0.0 | 0.0 | 1.4 | 0.0 | 0.0 | 0.3 | <b>0.2</b> |
| GGT62;HOT171   | <i>Actinomyces sp._Oral_Taxon_175</i>         | 1.0 | 0.2 | 0.2 | 0.0 | 0.1 | 0.0 | 0.0 | 0.1 | 0.1 | 0.0 | 0.2 | 0.0 | 0.0 | <b>0.1</b> |
| GGT1819;HOT411 | <i>Streptococcus sp._Oral_Taxon_056</i>       | 0.3 | 0.0 | 0.1 | 0.0 | 0.0 | 0.9 | 0.0 | 0.0 | 0.0 | 0.1 | 0.3 | 0.1 | 0.0 | <b>0.1</b> |
| GGT675;HOT118  | <i>Granulicatella elegans</i>                 | 0.2 | 0.0 | 0.1 | 0.2 | 0.0 | 0.0 | 0.1 | 0.1 | 0.1 | 0.1 | 0.2 | 0.1 | 0.6 | <b>0.1</b> |
| GGT1361;HOT807 | <i>Rothia aeria</i>                           | 0.2 | 0.3 | 0.0 | 0.1 | 0.0 | 0.0 | 0.5 | 0.0 | 0.1 | 0.0 | 0.4 | 0.0 | 0.1 | <b>0.1</b> |
| GGT712         | <i>Kingella oralis</i>                        | 0.1 | 0.1 | 0.1 | 0.0 | 0.3 | 0.0 | 0.0 | 0.1 | 0.0 | 0.0 | 1.0 | 0.0 | 0.0 | <b>0.1</b> |
| HOT458         | <i>Cardiobacterium hominis</i>                | 0.0 | 0.0 | 0.1 | 0.0 | 1.0 | 0.3 | 0.1 | 0.0 | 0.1 | 0.0 | 0.0 | 0.0 | 0.0 | <b>0.1</b> |
| HOT412         | <i>Porphyromonas sp._Oral_Taxon_275</i>       | 0.0 | 0.2 | 0.0 | 0.0 | 0.0 | 0.0 | 0.0 | 1.4 | 0.0 | 0.0 | 0.0 | 0.0 | 0.0 | <b>0.1</b> |
| GGT1486;HOT714 | <i>Prevotella sp._Oral_Taxon_300</i>          | 0.5 | 0.0 | 0.4 | 0.0 | 0.6 | 0.0 | 0.0 | 0.0 | 0.0 | 0.0 | 0.0 | 0.2 | 0.0 | <b>0.1</b> |
| HOT300         | <i>Prevotella veroralis</i>                   | 1.5 | 0.0 | 0.1 | 0.0 | 0.0 | 0.0 | 0.0 | 0.0 | 0.0 | 0.0 | 0.0 | 0.0 | 0.0 | <b>0.1</b> |
| HOT286         | <i>Dialister invisus</i>                      | 1.1 | 0.0 | 0.4 | 0.0 | 0.0 | 0.0 | 0.0 | 0.0 | 0.0 | 0.0 | 0.0 | 0.0 | 0.0 | <b>0.1</b> |
| GGT1488;HOT299 | <i>Prevotella sp._Oral_Taxon_G60</i>          | 0.0 | 0.1 | 0.7 | 0.1 | 0.4 | 0.1 | 0.0 | 0.0 | 0.0 | 0.0 | 0.0 | 0.1 | 0.0 | <b>0.1</b> |
| HOT618         | <i>Actinomyces gerencseriae</i>               | 0.0 | 0.0 | 0.0 | 0.0 | 1.0 | 0.0 | 0.1 | 0.0 | 0.4 | 0.0 | 0.0 | 0.0 | 0.0 | <b>0.1</b> |
| GGT60;HOT180   | <i>Actinomyces sp._Oral_Taxon_446</i>         | 0.0 | 0.0 | 0.0 | 0.0 | 0.0 | 0.0 | 0.0 | 0.1 | 0.4 | 0.2 | 0.2 | 0.0 | 0.6 | <b>0.1</b> |
| HOT336         | <i>Porphyromonas catoniae</i>                 | 0.1 | 0.0 | 0.7 | 0.0 | 0.0 | 0.0 | 0.0 | 0.3 | 0.0 | 0.0 | 0.3 | 0.0 | 0.1 | <b>0.1</b> |
| GGT738         | <i>Klebsiella pneumoniae</i>                  | 0.0 | 1.4 | 0.0 | 0.0 | 0.0 | 0.0 | 0.0 | 0.0 | 0.0 | 0.0 | 0.0 | 0.0 | 0.0 | <b>0.1</b> |
| HOT849         | <i>Actinomyces johnsonii</i>                  | 0.5 | 0.4 | 0.0 | 0.0 | 0.0 | 0.0 | 0.0 | 0.4 | 0.0 | 0.0 | 0.0 | 0.0 | 0.0 | <b>0.1</b> |

|                |                                           |     |     |     |     |     |     |     |     |     |     |     |     |     |            |
|----------------|-------------------------------------------|-----|-----|-----|-----|-----|-----|-----|-----|-----|-----|-----|-----|-----|------------|
| GGT816;HOT626  | <i>Lachnoanaerobaculum saburreum</i>      | 0.0 | 0.1 | 0.2 | 0.0 | 0.2 | 0.2 | 0.6 | 0.0 | 0.0 | 0.0 | 0.1 | 0.0 | 0.0 | <b>0.1</b> |
| GGT54;HOT179   | <i>Atopobium rimae</i>                    | 0.7 | 0.0 | 0.2 | 0.0 | 0.1 | 0.1 | 0.0 | 0.0 | 0.0 | 0.0 | 0.0 | 0.2 | 0.0 | <b>0.1</b> |
| GGT46;HOT176   | <i>Actinomyces naeslundii</i>             | 0.0 | 0.1 | 0.0 | 0.2 | 0.6 | 0.0 | 0.0 | 0.0 | 0.2 | 0.1 | 0.0 | 0.0 | 0.0 | <b>0.1</b> |
| HOT097         | <i>Selenomonas noxia</i>                  | 0.0 | 0.0 | 0.3 | 0.0 | 0.6 | 0.2 | 0.1 | 0.0 | 0.0 | 0.0 | 0.0 | 0.0 | 0.0 | <b>0.1</b> |
| HOTF78         | <i>Atopobium parvulum</i>                 | 0.1 | 0.2 | 0.3 | 0.1 | 0.1 | 0.0 | 0.0 | 0.1 | 0.0 | 0.0 | 0.0 | 0.2 | 0.1 | <b>0.1</b> |
| GGT808;HOT202  | <i>Leptotrichia hofstadii</i>             | 0.0 | 0.0 | 0.1 | 0.0 | 0.1 | 0.0 | 0.8 | 0.0 | 0.0 | 0.0 | 0.0 | 0.0 | 0.1 | <b>0.1</b> |
| GGT1988;HOT717 | <i>TM7_[G-1] sp._Oral_Taxon_348</i>       | 0.0 | 0.0 | 0.7 | 0.0 | 0.1 | 0.0 | 0.2 | 0.1 | 0.0 | 0.0 | 0.2 | 0.0 | 0.0 | <b>0.1</b> |
| HOT313         | <i>Tannerella sp._Oral_Taxon_286</i>      | 0.0 | 0.0 | 0.3 | 0.0 | 0.3 | 0.2 | 0.2 | 0.0 | 0.1 | 0.0 | 0.0 | 0.0 | 0.0 | <b>0.1</b> |
| GGT1490;HOT289 | <i>Prevotella oris</i>                    | 1.0 | 0.0 | 0.2 | 0.0 | 0.0 | 0.0 | 0.0 | 0.0 | 0.0 | 0.0 | 0.0 | 0.0 | 0.0 | <b>0.1</b> |
| GGT530;HOT595  | <i>Dietzia sp._Oral_Taxon_D12</i>         | 0.0 | 0.0 | 0.0 | 0.0 | 0.0 | 0.0 | 0.0 | 0.0 | 0.0 | 0.0 | 0.0 | 1.2 | 0.0 | <b>0.1</b> |
| GGT1022;HOT817 | <i>Lactobacillus johnsonii</i>            | 0.0 | 0.0 | 0.0 | 0.0 | 0.9 | 0.1 | 0.0 | 0.0 | 0.0 | 0.1 | 0.0 | 0.0 | 0.0 | <b>0.1</b> |
| GGT1794;HOT543 | <i>Streptococcus infantis</i>             | 0.0 | 0.1 | 0.1 | 0.2 | 0.0 | 0.4 | 0.1 | 0.0 | 0.0 | 0.0 | 0.1 | 0.0 | 0.1 | <b>0.1</b> |
| GGT376;HOT575  | <i>Defluviobacter lusatiensis</i>         | 0.0 | 0.0 | 0.0 | 0.0 | 0.0 | 0.0 | 0.0 | 0.0 | 0.0 | 0.0 | 0.0 | 1.1 | 0.0 | <b>0.1</b> |
| GGT1483;HOT469 | <i>Prevotella oulorum</i>                 | 0.3 | 0.0 | 0.3 | 0.0 | 0.2 | 0.1 | 0.0 | 0.0 | 0.0 | 0.0 | 0.0 | 0.2 | 0.0 | <b>0.1</b> |
| HOTE20         | <i>Streptococcus australis</i>            | 0.0 | 0.0 | 0.0 | 0.1 | 0.0 | 0.1 | 0.6 | 0.0 | 0.0 | 0.1 | 0.0 | 0.0 | 0.1 | <b>0.1</b> |
| GGT1477;HOT307 | <i>Prevotella sp._Oral_Taxon_313</i>      | 0.0 | 0.0 | 1.0 | 0.0 | 0.0 | 0.0 | 0.0 | 0.0 | 0.0 | 0.0 | 0.0 | 0.0 | 0.0 | <b>0.1</b> |
| GGT32;HOT554   | <i>Campylobacter concisus</i>             | 0.0 | 0.2 | 0.2 | 0.1 | 0.0 | 0.0 | 0.1 | 0.1 | 0.0 | 0.1 | 0.1 | 0.0 | 0.1 | <b>0.1</b> |
| HOT064         | <i>Streptococcus sp._Oral_Taxon_431</i>   | 0.0 | 0.1 | 0.2 | 0.3 | 0.0 | 0.1 | 0.1 | 0.0 | 0.0 | 0.0 | 0.0 | 0.0 | 0.1 | <b>0.1</b> |
| HOT096         | <i>Lactobacillus gasserii</i>             | 0.1 | 0.0 | 0.0 | 0.4 | 0.0 | 0.0 | 0.0 | 0.0 | 0.0 | 0.4 | 0.0 | 0.0 | 0.0 | <b>0.1</b> |
| HOT322         | <i>Capnocytophaga granulosa</i>           | 0.0 | 0.0 | 0.3 | 0.0 | 0.0 | 0.1 | 0.4 | 0.0 | 0.0 | 0.0 | 0.0 | 0.0 | 0.0 | <b>0.1</b> |
| HOT389         | <i>Gemella haemolysans</i>                | 0.5 | 0.0 | 0.3 | 0.0 | 0.0 | 0.0 | 0.0 | 0.0 | 0.0 | 0.0 | 0.1 | 0.0 | 0.0 | <b>0.1</b> |
| HOT900         | <i>Capnocytophaga leadbetteri</i>         | 0.0 | 0.1 | 0.4 | 0.0 | 0.0 | 0.1 | 0.3 | 0.0 | 0.0 | 0.0 | 0.0 | 0.0 | 0.0 | <b>0.1</b> |
| GGT1479;HOT794 | <i>Prevotella pallens</i>                 | 0.0 | 0.0 | 0.8 | 0.0 | 0.0 | 0.0 | 0.0 | 0.0 | 0.0 | 0.0 | 0.0 | 0.1 | 0.0 | <b>0.1</b> |
| HOT278         | <i>Porphyromonas sp._Oral_Taxon_B43</i>   | 0.0 | 0.1 | 0.0 | 0.0 | 0.0 | 0.0 | 0.0 | 0.0 | 0.0 | 0.0 | 0.7 | 0.0 | 0.0 | <b>0.1</b> |
| HOT498         | <i>Aggregatibacter sp._Oral_Taxon_458</i> | 0.0 | 0.1 | 0.2 | 0.0 | 0.0 | 0.0 | 0.1 | 0.1 | 0.0 | 0.0 | 0.3 | 0.0 | 0.0 | <b>0.1</b> |
| HOTH23         | <i>Streptococcus constellatus</i>         | 0.3 | 0.0 | 0.5 | 0.0 | 0.0 | 0.0 | 0.0 | 0.0 | 0.0 | 0.0 | 0.0 | 0.0 | 0.0 | <b>0.1</b> |
| HOTA88         | <i>Yersinia mollaretii</i>                | 0.0 | 0.0 | 0.0 | 0.0 | 0.3 | 0.0 | 0.2 | 0.0 | 0.0 | 0.1 | 0.0 | 0.2 | 0.0 | <b>0.1</b> |
| HOT739         | <i>Rothia mucilaginosa</i>                | 0.0 | 0.1 | 0.2 | 0.0 | 0.0 | 0.0 | 0.0 | 0.1 | 0.0 | 0.0 | 0.1 | 0.0 | 0.2 | <b>0.1</b> |
| GGT78;HOT485   | <i>Cardiobacterium valvulum</i>           | 0.0 | 0.0 | 0.1 | 0.0 | 0.0 | 0.6 | 0.1 | 0.0 | 0.0 | 0.0 | 0.0 | 0.0 | 0.0 | <b>0.1</b> |
| HOT326         | <i>Capnocytophaga sputigena</i>           | 0.3 | 0.1 | 0.0 | 0.0 | 0.0 | 0.1 | 0.0 | 0.0 | 0.0 | 0.0 | 0.2 | 0.0 | 0.0 | <b>0.1</b> |
| HOT912         | <i>Bergeyella sp._Oral_Taxon_322</i>      | 0.0 | 0.0 | 0.1 | 0.0 | 0.0 | 0.0 | 0.1 | 0.1 | 0.0 | 0.0 | 0.3 | 0.0 | 0.0 | <b>0.1</b> |
| HOT461         | <i>Moryella sp._Oral_Taxon_419</i>        | 0.2 | 0.0 | 0.4 | 0.0 | 0.0 | 0.0 | 0.0 | 0.0 | 0.0 | 0.0 | 0.0 | 0.0 | 0.0 | <b>0.1</b> |
| HOTE53         | <i>Fusobacterium sp._Oral_Taxon_H27</i>   | 0.1 | 0.0 | 0.5 | 0.0 | 0.0 | 0.0 | 0.0 | 0.0 | 0.0 | 0.0 | 0.0 | 0.0 | 0.0 | <b>0.1</b> |

|                |                                            |     |     |     |     |     |     |     |     |     |     |     |     |     |            |
|----------------|--------------------------------------------|-----|-----|-----|-----|-----|-----|-----|-----|-----|-----|-----|-----|-----|------------|
| HOT688         | <i>Actinomyces odontolyticus</i>           | 0.0 | 0.1 | 0.0 | 0.1 | 0.0 | 0.0 | 0.1 | 0.1 | 0.0 | 0.0 | 0.1 | 0.0 | 0.1 | <b>0.0</b> |
| HOT596         | <i>actinoacillus crispatus</i>             | 0.0 | 0.0 | 0.0 | 0.0 | 0.4 | 0.1 | 0.0 | 0.0 | 0.0 | 0.0 | 0.0 | 0.0 | 0.0 | <b>0.0</b> |
| GGT1026;HOT749 | <i>Mitsuokella sp._Oral_Taxon_131</i>      | 0.0 | 0.0 | 0.2 | 0.0 | 0.0 | 0.0 | 0.0 | 0.0 | 0.1 | 0.0 | 0.0 | 0.3 | 0.0 | <b>0.0</b> |
| HOT348         | <i>TM7_[G-3] sp._Oral_Taxon_351</i>        | 0.4 | 0.0 | 0.1 | 0.0 | 0.0 | 0.0 | 0.0 | 0.0 | 0.0 | 0.0 | 0.0 | 0.0 | 0.0 | <b>0.0</b> |
| GGT378;HOT623  | <i>Eikenella corrodens</i>                 | 0.0 | 0.0 | 0.2 | 0.0 | 0.2 | 0.1 | 0.0 | 0.0 | 0.1 | 0.0 | 0.0 | 0.0 | 0.0 | <b>0.0</b> |
| HOT324         | <i>Capnocytophaga sp._Oral_Taxon_412</i>   | 0.0 | 0.0 | 0.0 | 0.0 | 0.0 | 0.0 | 0.3 | 0.0 | 0.0 | 0.0 | 0.2 | 0.0 | 0.0 | <b>0.0</b> |
| HOT888         | <i>Actinomyces dentalis</i>                | 0.0 | 0.0 | 0.1 | 0.0 | 0.2 | 0.0 | 0.0 | 0.0 | 0.0 | 0.0 | 0.0 | 0.1 | 0.0 | <b>0.0</b> |
| GGT157;HOT750  | <i>Cryptobacterium curtum</i>              | 0.1 | 0.0 | 0.1 | 0.0 | 0.1 | 0.0 | 0.0 | 0.0 | 0.0 | 0.0 | 0.0 | 0.2 | 0.0 | <b>0.0</b> |
| HOT061         | <i>Streptococcus sp._Oral_Taxon_074</i>    | 0.0 | 0.1 | 0.1 | 0.0 | 0.0 | 0.1 | 0.0 | 0.0 | 0.0 | 0.1 | 0.0 | 0.0 | 0.2 | <b>0.0</b> |
| GGT1027;HOT819 | <i>Lactobacillus sp._Oral_Taxon_461</i>    | 0.5 | 0.0 | 0.0 | 0.0 | 0.0 | 0.0 | 0.0 | 0.0 | 0.0 | 0.0 | 0.0 | 0.0 | 0.0 | <b>0.0</b> |
| GGT573;HOT579  | <i>Olsenella sp._Oral_Taxon_807</i>        | 0.0 | 0.0 | 0.1 | 0.0 | 0.1 | 0.0 | 0.2 | 0.0 | 0.0 | 0.0 | 0.0 | 0.0 | 0.0 | <b>0.0</b> |
| GGT1025;HOT716 | <i>Lactobacillus vaginalis</i>             | 0.0 | 0.0 | 0.0 | 0.0 | 0.0 | 0.0 | 0.0 | 0.0 | 0.0 | 0.5 | 0.0 | 0.0 | 0.0 | <b>0.0</b> |
| GGT1807;HOT638 | <i>Streptococcus parasanguinis_I</i>       | 0.0 | 0.0 | 0.1 | 0.1 | 0.0 | 0.0 | 0.0 | 0.2 | 0.0 | 0.0 | 0.0 | 0.0 | 0.0 | <b>0.0</b> |
| GGT1043;HOT756 | <i>Moryella sp._Oral_Taxon_097</i>         | 0.1 | 0.1 | 0.2 | 0.0 | 0.0 | 0.0 | 0.0 | 0.0 | 0.0 | 0.0 | 0.0 | 0.0 | 0.0 | <b>0.0</b> |
| GGT1570;HOT854 | <i>TM7_[G-1] sp._Oral_Taxon_347</i>        | 0.0 | 0.0 | 0.0 | 0.0 | 0.3 | 0.1 | 0.0 | 0.0 | 0.0 | 0.0 | 0.0 | 0.0 | 0.0 | <b>0.0</b> |
| GGT380;HOT763  | <i>Enterobacter cloacae</i>                | 0.0 | 0.0 | 0.0 | 0.0 | 0.0 | 0.0 | 0.3 | 0.0 | 0.0 | 0.0 | 0.0 | 0.0 | 0.0 | <b>0.0</b> |
| GGT1546        | <i>Ralstonia pickettii</i>                 | 0.0 | 0.0 | 0.0 | 0.0 | 0.2 | 0.0 | 0.0 | 0.0 | 0.0 | 0.0 | 0.0 | 0.0 | 0.0 | <b>0.0</b> |
| GGT711         | <i>Kingella denitrificans</i>              | 0.1 | 0.0 | 0.0 | 0.0 | 0.0 | 0.0 | 0.1 | 0.0 | 0.0 | 0.0 | 0.0 | 0.0 | 0.1 | <b>0.0</b> |
| GGT807;HOT420  | <i>Leptotrichia buccalis</i>               | 0.0 | 0.0 | 0.1 | 0.0 | 0.1 | 0.0 | 0.1 | 0.0 | 0.0 | 0.0 | 0.0 | 0.0 | 0.0 | <b>0.0</b> |
| HOT323         | <i>Capnocytophaga sp._Oral_Taxon_336</i>   | 0.0 | 0.1 | 0.1 | 0.0 | 0.0 | 0.0 | 0.1 | 0.0 | 0.0 | 0.0 | 0.0 | 0.0 | 0.0 | <b>0.0</b> |
| GGT1037;HOT818 | <i>Megasphaera micronuciformis</i>         | 0.0 | 0.0 | 0.1 | 0.0 | 0.1 | 0.0 | 0.0 | 0.0 | 0.0 | 0.0 | 0.0 | 0.0 | 0.0 | <b>0.0</b> |
| GGT387;HOT700  | <i>Capnocytophaga sp._Oral_Taxon_326</i>   | 0.1 | 0.0 | 0.1 | 0.0 | 0.1 | 0.1 | 0.0 | 0.0 | 0.0 | 0.0 | 0.0 | 0.0 | 0.0 | <b>0.0</b> |
| HOT221         | <i>Acinetobacter sp._Oral_Taxon_A58</i>    | 0.0 | 0.0 | 0.0 | 0.0 | 0.4 | 0.0 | 0.0 | 0.0 | 0.0 | 0.0 | 0.0 | 0.0 | 0.0 | <b>0.0</b> |
| GGT1432;HOT111 | <i>Staphylococcus equorum</i>              | 0.0 | 0.0 | 0.4 | 0.0 | 0.0 | 0.0 | 0.0 | 0.0 | 0.0 | 0.0 | 0.0 | 0.0 | 0.0 | <b>0.0</b> |
| GGT306         | <i>Gemella sanguinis</i>                   | 0.0 | 0.0 | 0.0 | 0.0 | 0.0 | 0.0 | 0.0 | 0.0 | 0.0 | 0.0 | 0.0 | 0.0 | 0.2 | <b>0.0</b> |
| GGT550;HOT666  | <i>Olsenella profusa</i>                   | 0.0 | 0.1 | 0.1 | 0.0 | 0.0 | 0.0 | 0.0 | 0.0 | 0.0 | 0.0 | 0.0 | 0.0 | 0.0 | <b>0.0</b> |
| GGT1312;HOT764 | <i>Pseudomonas mosselii_Oral_Taxon_A88</i> | 0.0 | 0.0 | 0.0 | 0.0 | 0.0 | 0.4 | 0.0 | 0.0 | 0.0 | 0.0 | 0.0 | 0.0 | 0.0 | <b>0.0</b> |
| GGT1041;HOT051 | <i>Oribacterium sinus</i>                  | 0.0 | 0.1 | 0.1 | 0.0 | 0.0 | 0.0 | 0.0 | 0.0 | 0.0 | 0.0 | 0.0 | 0.0 | 0.0 | <b>0.0</b> |
| GGT1302;HOT729 | <i>Pseudomonas fluorescens</i>             | 0.0 | 0.0 | 0.0 | 0.0 | 0.0 | 0.0 | 0.2 | 0.0 | 0.0 | 0.1 | 0.0 | 0.1 | 0.0 | <b>0.0</b> |
| HOT329         | <i>Capnocytophaga sp._Oral_Taxon_324</i>   | 0.0 | 0.1 | 0.0 | 0.0 | 0.2 | 0.0 | 0.0 | 0.0 | 0.0 | 0.0 | 0.0 | 0.0 | 0.0 | <b>0.0</b> |
| GGT1114;HOT122 | <i>Oribacterium sp._Oral_Taxon_078</i>     | 0.2 | 0.0 | 0.0 | 0.0 | 0.0 | 0.0 | 0.0 | 0.0 | 0.0 | 0.0 | 0.0 | 0.0 | 0.0 | <b>0.0</b> |
| GGT1362;HOT806 | <i>Propionibacterium propionicum</i>       | 0.0 | 0.0 | 0.0 | 0.0 | 0.0 | 0.0 | 0.0 | 0.0 | 0.1 | 0.0 | 0.2 | 0.0 | 0.0 | <b>0.0</b> |

|                           |                                                     |     |     |     |     |     |     |     |     |     |     |     |     |     |            |
|---------------------------|-----------------------------------------------------|-----|-----|-----|-----|-----|-----|-----|-----|-----|-----|-----|-----|-----|------------|
| HOT887                    | <i>Fusobacterium periodonticum</i>                  | 0.0 | 0.0 | 0.1 | 0.0 | 0.0 | 0.0 | 0.0 | 0.0 | 0.0 | 0.0 | 0.0 | 0.0 | 0.0 | <b>0.0</b> |
| GGT56                     | <i>Corynebacterium durum</i>                        | 0.0 | 0.0 | 0.0 | 0.0 | 0.0 | 0.0 | 0.0 | 0.0 | 0.0 | 0.0 | 0.1 | 0.0 | 0.1 | <b>0.0</b> |
| HOTF11                    | <i>Streptococcus vestibularis</i>                   | 0.1 | 0.0 | 0.0 | 0.0 | 0.0 | 0.0 | 0.0 | 0.0 | 0.1 | 0.1 | 0.0 | 0.0 | 0.0 | <b>0.0</b> |
| HOT070                    | <i>Streptococcus sp._Oral_Taxon_E78</i>             | 0.0 | 0.0 | 0.0 | 0.0 | 0.0 | 0.1 | 0.0 | 0.0 | 0.0 | 0.0 | 0.0 | 0.0 | 0.0 | <b>0.0</b> |
| HOTB43                    | <i>Prevotella maculosa</i>                          | 0.2 | 0.0 | 0.0 | 0.0 | 0.1 | 0.0 | 0.0 | 0.0 | 0.0 | 0.0 | 0.0 | 0.0 | 0.0 | <b>0.0</b> |
| GGT1624;HOT587            | <i>Alloprevotella sp._Oral_Taxon_473</i>            | 0.1 | 0.0 | 0.1 | 0.0 | 0.0 | 0.0 | 0.0 | 0.0 | 0.0 | 0.0 | 0.0 | 0.0 | 0.0 | <b>0.0</b> |
| HOT473                    | <i>Alloprevotella tanneriae</i>                     | 0.0 | 0.0 | 0.3 | 0.0 | 0.0 | 0.0 | 0.0 | 0.0 | 0.0 | 0.0 | 0.0 | 0.0 | 0.0 | <b>0.0</b> |
| GGT1000;HOT582            | <i>Neisseria elongata</i>                           | 0.0 | 0.0 | 0.0 | 0.0 | 0.0 | 0.0 | 0.1 | 0.0 | 0.0 | 0.0 | 0.0 | 0.0 | 0.0 | <b>0.0</b> |
| HOT874                    | <i>TM7_[G-1] sp._Oral_Taxon_352</i>                 | 0.0 | 0.0 | 0.1 | 0.0 | 0.0 | 0.0 | 0.0 | 0.0 | 0.0 | 0.0 | 0.0 | 0.0 | 0.1 | <b>0.0</b> |
| GGT1308;HOT476;<br>HOT610 | <i>Pseudomonas aeruginosa</i>                       | 0.0 | 0.0 | 0.0 | 0.0 | 0.0 | 0.0 | 0.0 | 0.0 | 0.0 | 0.0 | 0.0 | 0.2 | 0.0 | <b>0.0</b> |
| HOTG62                    | <i>Veillonella atypica</i>                          | 0.0 | 0.0 | 0.1 | 0.0 | 0.0 | 0.0 | 0.0 | 0.0 | 0.0 | 0.1 | 0.0 | 0.0 | 0.0 | <b>0.0</b> |
| GGT815;HOT046             | <i>Lachnospiraceae_[G-2]<br/>sp._Oral_Taxon_096</i> | 0.0 | 0.1 | 0.1 | 0.0 | 0.0 | 0.0 | 0.0 | 0.0 | 0.0 | 0.0 | 0.0 | 0.0 | 0.0 | <b>0.0</b> |
| GGT1784;HOT734            | <i>Streptococcus sp._Oral_Taxon_057</i>             | 0.0 | 0.0 | 0.0 | 0.0 | 0.0 | 0.1 | 0.0 | 0.0 | 0.0 | 0.1 | 0.0 | 0.0 | 0.0 | <b>0.0</b> |
| GGT1034                   | <i>Lactobacillus salivarius</i>                     | 0.0 | 0.0 | 0.0 | 0.0 | 0.0 | 0.0 | 0.0 | 0.0 | 0.0 | 0.2 | 0.0 | 0.0 | 0.0 | <b>0.0</b> |
| HOT305                    | <i>Riemerella anatipestifer</i>                     | 0.0 | 0.0 | 0.0 | 0.0 | 0.0 | 0.0 | 0.0 | 0.0 | 0.0 | 0.0 | 0.0 | 0.0 | 0.2 | <b>0.0</b> |
| HOT078                    | <i>Selenomonas sputigena</i>                        | 0.0 | 0.0 | 0.0 | 0.0 | 0.0 | 0.0 | 0.0 | 0.0 | 0.0 | 0.0 | 0.0 | 0.1 | 0.0 | <b>0.0</b> |
| HOTE78                    | <i>Streptococcus sp._str._M334</i>                  | 0.0 | 0.0 | 0.0 | 0.1 | 0.0 | 0.0 | 0.0 | 0.0 | 0.0 | 0.0 | 0.0 | 0.0 | 0.0 | <b>0.0</b> |
| HOT222                    | <i>Agrobacterium tumefaciens</i>                    | 0.0 | 0.0 | 0.0 | 0.0 | 0.0 | 0.0 | 0.0 | 0.0 | 0.0 | 0.0 | 0.0 | 0.2 | 0.0 | <b>0.0</b> |
| GGT1473;HOT288            | <i>Prevotella sp._Oral_Taxon_299</i>                | 0.0 | 0.1 | 0.0 | 0.0 | 0.0 | 0.0 | 0.0 | 0.0 | 0.0 | 0.0 | 0.1 | 0.0 | 0.0 | <b>0.0</b> |
| GGT1809                   | <i>Veillonella denticariosi</i>                     | 0.0 | 0.0 | 0.2 | 0.0 | 0.0 | 0.0 | 0.0 | 0.0 | 0.0 | 0.0 | 0.0 | 0.0 | 0.0 | <b>0.0</b> |
| GGT392;HOT775             | <i>Porphyromonas sp._Oral_Taxon_278</i>             | 0.0 | 0.0 | 0.2 | 0.0 | 0.0 | 0.0 | 0.0 | 0.0 | 0.0 | 0.0 | 0.0 | 0.0 | 0.0 | <b>0.0</b> |
| HOT913                    | <i>Bergeyella sp._Oral_Taxon_900</i>                | 0.0 | 0.0 | 0.0 | 0.0 | 0.1 | 0.0 | 0.1 | 0.0 | 0.0 | 0.0 | 0.0 | 0.0 | 0.0 | <b>0.0</b> |
| HOT419                    | <i>Selenomonas sp._Oral_Taxon_E20</i>               | 0.0 | 0.0 | 0.2 | 0.0 | 0.0 | 0.0 | 0.0 | 0.0 | 0.0 | 0.0 | 0.0 | 0.0 | 0.0 | <b>0.0</b> |
| HOT347                    | <i>TM7_[G-1] sp._Oral_Taxon_870</i>                 | 0.0 | 0.0 | 0.2 | 0.0 | 0.0 | 0.0 | 0.0 | 0.0 | 0.0 | 0.0 | 0.0 | 0.0 | 0.0 | <b>0.0</b> |
| HOT349                    | <i>Treponema socranskii_ss_socranskii</i>           | 0.1 | 0.0 | 0.1 | 0.0 | 0.0 | 0.0 | 0.0 | 0.0 | 0.0 | 0.0 | 0.0 | 0.0 | 0.0 | <b>0.0</b> |
| GGT33                     | <i>Campylobacter showae</i>                         | 0.0 | 0.0 | 0.1 | 0.0 | 0.0 | 0.0 | 0.0 | 0.0 | 0.0 | 0.0 | 0.0 | 0.0 | 0.0 | <b>0.0</b> |
| GGT1074;HOT563            | <i>Leptotrichia sp._Oral_Taxon_221</i>              | 0.0 | 0.1 | 0.0 | 0.0 | 0.0 | 0.0 | 0.0 | 0.0 | 0.0 | 0.0 | 0.0 | 0.0 | 0.0 | <b>0.0</b> |
| HOT100                    | <i>Lactobacillus helveticus</i>                     | 0.0 | 0.0 | 0.0 | 0.0 | 0.1 | 0.0 | 0.0 | 0.0 | 0.0 | 0.0 | 0.0 | 0.0 | 0.0 | <b>0.0</b> |
| GGT2038                   | <i>TM7_[G-1] sp._Oral_Taxon_349</i>                 | 0.0 | 0.0 | 0.1 | 0.0 | 0.0 | 0.0 | 0.0 | 0.0 | 0.0 | 0.0 | 0.0 | 0.0 | 0.0 | <b>0.0</b> |
| HOT298                    | <i>Prevotella multisaccharivorax</i>                | 0.0 | 0.0 | 0.2 | 0.0 | 0.0 | 0.0 | 0.0 | 0.0 | 0.0 | 0.0 | 0.0 | 0.0 | 0.0 | <b>0.0</b> |
| GGT1367;HOT457            | <i>Selenomonas sp._Oral_Taxon_H23</i>               | 0.0 | 0.0 | 0.0 | 0.0 | 0.1 | 0.0 | 0.0 | 0.0 | 0.0 | 0.0 | 0.0 | 0.0 | 0.0 | <b>0.0</b> |

|                                  |                                                     |             |             |             |             |             |             |             |             |             |             |             |             |             |            |
|----------------------------------|-----------------------------------------------------|-------------|-------------|-------------|-------------|-------------|-------------|-------------|-------------|-------------|-------------|-------------|-------------|-------------|------------|
| HOTH27                           | <i>Leptotrichia sp._Oral_Taxon_215</i>              | 0.0         | 0.0         | 0.1         | 0.0         | 0.0         | 0.0         | 0.0         | 0.0         | 0.0         | 0.0         | 0.0         | 0.0         | 0.0         | <b>0.0</b> |
| GGT813;HOT757                    | <i>Lachnospiraceae_[G-3]<br/>sp._Oral_Taxon_100</i> | 0.0         | 0.0         | 0.1         | 0.0         | 0.0         | 0.0         | 0.0         | 0.0         | 0.0         | 0.0         | 0.0         | 0.0         | 0.0         | <b>0.0</b> |
| HOT074                           | <i>Streptococcus sp._Oral_Taxon_G62</i>             | 0.0         | 0.0         | 0.0         | 0.0         | 0.0         | 0.0         | 0.0         | 0.0         | 0.0         | 0.0         | 0.0         | 0.1         | 0.0         | <b>0.0</b> |
| HOT131                           | <i>Parvimonas micra</i>                             | 0.1         | 0.0         | 0.0         | 0.0         | 0.0         | 0.0         | 0.0         | 0.0         | 0.0         | 0.0         | 0.0         | 0.0         | 0.0         | <b>0.0</b> |
| GGT388;HOT325                    | <i>Capnocytophaga sp._Oral_Taxon_323</i>            | 0.0         | 0.0         | 0.0         | 0.0         | 0.1         | 0.0         | 0.0         | 0.0         | 0.0         | 0.0         | 0.0         | 0.0         | 0.0         | <b>0.0</b> |
| HOT448                           | <i>Actinomyces sp._Oral_Taxon_E63</i>               | 0.0         | 0.0         | 0.1         | 0.0         | 0.0         | 0.0         | 0.0         | 0.0         | 0.0         | 0.0         | 0.0         | 0.0         | 0.0         | <b>0.0</b> |
| HOT417                           | <i>Acinetobacter sp._str_DR1</i>                    | 0.0         | 0.0         | 0.0         | 0.0         | 0.0         | 0.0         | 0.0         | 0.0         | 0.0         | 0.0         | 0.0         | 0.0         | 0.1         | <b>0.0</b> |
| HOT317                           | <i>Tannerella sp._Oral_Taxon_808</i>                | 0.0         | 0.0         | 0.1         | 0.0         | 0.0         | 0.0         | 0.0         | 0.0         | 0.0         | 0.0         | 0.0         | 0.0         | 0.0         | <b>0.0</b> |
| GGT806;HOT201                    | <i>Leptotrichia shahii</i>                          | 0.0         | 0.0         | 0.1         | 0.0         | 0.0         | 0.0         | 0.0         | 0.0         | 0.0         | 0.0         | 0.0         | 0.0         | 0.0         | <b>0.0</b> |
| HOT195                           | <i>Alloprevotella sp._Oral_Taxon_913</i>            | 0.0         | 0.0         | 0.1         | 0.0         | 0.0         | 0.0         | 0.0         | 0.0         | 0.0         | 0.0         | 0.0         | 0.0         | 0.0         | <b>0.0</b> |
| HOT609                           | <i>Ochrobactrum anthropi</i>                        | 0.0         | 0.0         | 0.0         | 0.0         | 0.0         | 0.0         | 0.0         | 0.0         | 0.0         | 0.0         | 0.0         | 0.1         | 0.0         | <b>0.0</b> |
| GGT1991;HOT158;<br>HOT160;HOT161 | <i>Fusobacterium sp._Oral_Taxon_203</i>             | 0.0         | 0.0         | 0.1         | 0.0         | 0.0         | 0.0         | 0.0         | 0.0         | 0.0         | 0.0         | 0.0         | 0.0         | 0.0         | <b>0.0</b> |
| GGT391;HOT337                    | <i>Capnocytophaga ochracea</i>                      | 0.0         | 0.0         | 0.0         | 0.0         | 0.0         | 0.1         | 0.0         | 0.0         | 0.0         | 0.0         | 0.0         | 0.0         | 0.0         | <b>0.0</b> |
| HOT071                           | <i>Streptococcus sp._Oral_Taxon_F11</i>             | 0.0         | 0.0         | 0.0         | 0.0         | 0.0         | 0.0         | 0.0         | 0.0         | 0.0         | 0.0         | 0.0         | 0.0         | 0.1         | <b>0.0</b> |
| GGT1031;HOT615                   | <i>Lactobacillus rhamnosus</i>                      | 0.0         | 0.0         | 0.0         | 0.0         | 0.0         | 0.0         | 0.0         | 0.0         | 0.0         | 0.0         | 0.0         | 0.0         | 0.1         | <b>0.0</b> |
| GGT1035;HOT608                   | <i>Lactobacillus reuteri</i>                        | 0.0         | 0.0         | 0.0         | 0.0         | 0.1         | 0.0         | 0.0         | 0.0         | 0.0         | 0.0         | 0.0         | 0.0         | 0.0         | <b>0.0</b> |
| GGT1051;HOT022                   | <i>Neisseria pharyngis</i>                          | 0.0         | 0.0         | 0.0         | 0.0         | 0.0         | 0.0         | 0.0         | 0.0         | 0.0         | 0.0         | 0.0         | 0.0         | 0.1         | <b>0.0</b> |
| GGT1608                          | <i>Brevibacillus brevis</i>                         | 0.0         | 0.0         | 0.0         | 0.0         | 0.1         | 0.0         | 0.0         | 0.0         | 0.0         | 0.0         | 0.0         | 0.0         | 0.0         | <b>0.0</b> |
| GGT731                           | <i>Kingella sp._Oral_Taxon_C21</i>                  | 0.0         | 0.0         | 0.0         | 0.0         | 0.0         | 0.0         | 0.0         | 0.0         | 0.0         | 0.0         | 0.1         | 0.0         | 0.0         | <b>0.0</b> |
| GGT1533                          | <i>SR1_[G-1] sp._Oral_Taxon_874</i>                 | 0.0         | 0.0         | 0.1         | 0.0         | 0.0         | 0.0         | 0.0         | 0.0         | 0.0         | 0.0         | 0.0         | 0.0         | 0.0         | <b>0.0</b> |
| HOT303                           | <i>Prevotella sp._Oral_Taxon_305</i>                | 0.0         | 0.0         | 0.0         | 0.1         | 0.0         | 0.0         | 0.0         | 0.0         | 0.0         | 0.0         | 0.0         | 0.0         | 0.0         | <b>0.0</b> |
| GGT1478;HOT693                   | <i>Prevotella pleuritidis</i>                       | 0.0         | 0.0         | 0.1         | 0.0         | 0.0         | 0.0         | 0.0         | 0.0         | 0.0         | 0.0         | 0.0         | 0.0         | 0.0         | <b>0.0</b> |
| GGT1476;HOT643                   | <i>Prevotella nigrescens</i>                        | 0.1         | 0.0         | 0.0         | 0.0         | 0.0         | 0.0         | 0.0         | 0.0         | 0.0         | 0.0         | 0.0         | 0.0         | 0.0         | <b>0.0</b> |
| GGT1482;HOT572                   | <i>Anaeroglobus geminatus</i>                       | 0.0         | 0.0         | 0.1         | 0.0         | 0.0         | 0.0         | 0.0         | 0.0         | 0.0         | 0.0         | 0.0         | 0.0         | 0.0         | <b>0.0</b> |
| GGT1627;HOT681                   | <i>Alloprevotella sp._Oral_Taxon_912</i>            | 0.0         | 0.0         | 0.1         | 0.0         | 0.0         | 0.0         | 0.0         | 0.0         | 0.0         | 0.0         | 0.0         | 0.0         | 0.0         | <b>0.0</b> |
| HOT808                           | <i>Dialister pneumosintes</i>                       | 0.0         | 0.0         | 0.1         | 0.0         | 0.0         | 0.0         | 0.0         | 0.0         | 0.0         | 0.0         | 0.0         | 0.0         | 0.0         | <b>0.0</b> |
| HOT346                           | <i>TM7_[G-1] sp._Oral_Taxon_353</i>                 | 0.0         | 0.0         | 0.1         | 0.0         | 0.0         | 0.0         | 0.0         | 0.0         | 0.0         | 0.0         | 0.0         | 0.0         | 0.0         | <b>0.0</b> |
|                                  | <b>Column Sum</b>                                   | <b>99.0</b> | <b>99.6</b> | <b>98.1</b> | <b>99.7</b> | <b>99.4</b> | <b>98.5</b> | <b>99.4</b> | <b>99.5</b> | <b>99.8</b> | <b>99.8</b> | <b>99.7</b> | <b>99.3</b> | <b>99.7</b> | <b>100</b> |

<sup>a</sup>Species observed in just one of the total patients, not representing a common data among the studied population
