# Supplementary material for: The oral bacterial microbiome of occlusal surfaces in children and its association with diet and caries
Source: PubMed Central journal article supplement (PMC5498058; doi:10.1371/journal.pone.0180621), 2017-07-05
Supplement: pone.0180621.s006.pdf [file pone.0180621.s006.pdf]

## The Oral Bacterial Microbiome of Occlusal Surfaces in Children and its Association with Diet And Caries

**S4 Table. Mean relative abundances (RA) of all species represented over 0.1%, by individual biofilm sample.**

| Relative abundance $\geq 0.1$        |                                         | Sound occlusal surfaces (bacterial microbiome from each surface sampled) |      |      |      |      |      |      |      |      |      |      |      |      |      |      |      |      |      |      |      |      |      |
|--------------------------------------|-----------------------------------------|--------------------------------------------------------------------------|------|------|------|------|------|------|------|------|------|------|------|------|------|------|------|------|------|------|------|------|------|
| Taxon_ID                             | Species                                 | 117                                                                      | 237  | 317  | 337  | 347  | 517  | 527  | 537  | 547  | 637  | 647  | 717  | 747  | 837  | 847  | 947  | 1037 | 1047 | 1147 | 1327 | 1337 | 1347 |
| GGT1;HOT5<br>34                      | <i>Granulicatella paradiacens</i>       | 5.2                                                                      | 9.2  | 3.5  | 19.3 | 3.1  | 16.6 | 29.7 | 11.1 | 47.7 | 30.5 | 4.5  | 9.8  | 5.7  | 23   | 27.6 | 20.6 | 9.3  | 29.6 | 0.9  | 5.8  | 11.9 | 11.4 |
| GGT1799;H<br>OT686                   | <i>Streptococcus mutans</i>             | 6.9                                                                      | 26.2 | 0.6  | 1    | 5.8  | 0.3  | 3.9  | 19.8 | 5.3  | 11   | 1.5  | 0.4  | 0.3  | 2.8  | 2.8  | 5.7  | 26.1 | 10.8 | 0.9  | 0.8  | 3.6  | 55.2 |
| GGT1822                              | <i>Streptococcus sp._str._C300</i>      | 2.4                                                                      | 4.1  | 7.4  | 17   | 14.9 | 19.6 | 7.3  | 4.9  | 4.2  | 3.3  | 5.3  | 5.1  | 0.7  | 4.2  | 11.1 | 6    | 5.5  | 2.8  | 0.4  | 1.1  | 3.3  | 0.8  |
| GGT1051;H<br>OT022                   | <i>Lautropia mirabilis</i>              | 2.8                                                                      | 2.2  | 30.4 | 12.7 | 21.9 | 6    | 2.8  | 1.8  | 2.7  | 2.5  | 5.8  | 9.5  | 4.1  | 3.3  | 0.6  | 5    | 0.5  | 2.5  | 0.2  | 0    | 4.1  | 1.2  |
| HOTC61                               | <i>Pseudomonas sp._Oral_Taxon_C61</i>   | 0                                                                        | 0    | 0    | 0    | 0    | 0    | 0    | 0    | 0    | 0    | 0    | 0    | 39.1 | 0    | 0    | 0    | 0    | 0    | 39.3 | 0    | 0    | 0    |
| GGT1803;H<br>OT622                   | <i>Streptococcus gordonii</i>           | 1.7                                                                      | 5.5  | 0.6  | 1.5  | 0.4  | 6.7  | 8.7  | 7.2  | 4    | 5.4  | 1.1  | 2.2  | 0.1  | 3.3  | 4.1  | 4.8  | 11.4 | 8.6  | 0    | 0.1  | 3.9  | 4.46 |
| GGT1789;H<br>OT758                   | <i>Streptococcus sanguinis</i>          | 0.7                                                                      | 0.3  | 5.8  | 2.6  | 4.6  | 3.3  | 6    | 4    | 2.6  | 3.3  | 9.7  | 4.5  | 1.7  | 3.2  | 3.2  | 1.9  | 5.8  | 2.6  | 0.7  | 0.4  | 1.2  | 2.21 |
| HOT389                               | <i>Abiotrophia defectiva</i>            | 0.8                                                                      | 0.4  | 0.9  | 4.3  | 0.3  | 4.8  | 1.2  | 1.7  | 2    | 4.7  | 0    | 0    | 0    | 0.3  | 0.9  | 0.2  | 0.4  | 0.5  | 0    | 0.1  | 11.5 | 0.43 |
| GGT1806;H<br>OT707                   | <i>Streptococcus oralis</i>             | 0                                                                        | 0    | 0.1  | 0.6  | 0.1  | 0.1  | 7.5  | 3.7  | 0.5  | 7.7  | 16.8 | 14.1 | 0    | 0    | 0.1  | 3.1  | 4.2  | 1.7  | 0    | 0    | 10.8 | 0    |
| HOTE53                               | <i>Veillonella sp._Oral_Taxon_E53</i>   | 1.4                                                                      | 4.1  | 7.1  | 1.6  | 8.8  | 3.1  | 1.2  | 1.9  | 2.7  | 1    | 0.6  | 4.8  | 3.7  | 1.6  | 0.1  | 2    | 1.5  | 1.7  | 1.7  | 14.2 | 6.6  | 2.46 |
| GGT1533                              | <i>Pseudomonas putida</i>               | 0                                                                        | 0    | 0    | 0    | 0    | 0    | 0    | 0    | 0    | 0    | 36.2 | 0    | 0    | 0    | 0    | 0    | 0    | 0    | 0    | 0    | 0    | 0    |
| GGT1312;H<br>OT764                   | <i>Neisseria sicca</i>                  | 0.1                                                                      | 0.1  | 0.6  | 4.1  | 0    | 0.1  | 0    | 0    | 0    | 0    | 0    | 0    | 2    | 17.2 | 35   | 0    | 0    | 0    | 0    | 0    | 0    | 0    |
| GGT1991;H<br>OT158;HOT1<br>60;HOT161 | <i>Veillonella parvula_group</i>        | 0.7                                                                      | 2.4  | 4.6  | 1.6  | 6.5  | 1    | 0.6  | 0.8  | 1.1  | 0.5  | 0.7  | 5.5  | 1.7  | 0.7  | 0.1  | 0.9  | 0.4  | 0.3  | 2.6  | 15.5 | 2.8  | 1.82 |
| GGT738                               | <i>Escherichia coli</i>                 | 0                                                                        | 0    | 0    | 0    | 0    | 0    | 0    | 0    | 0    | 0    | 0.1  | 0.1  | 0    | 0    | 0    | 0    | 0    | 0    | 0    | 0    | 0    | 0    |
| GGT32;HOT<br>554                     | <i>Acinetobacter baumannii</i>          | 0                                                                        | 0    | 0    | 0    | 0    | 0    | 1.2  | 0    | 0    | 0    | 0    | 0    | 0    | 0    | 0    | 0    | 0    | 0    | 0    | 0    | 0    | 0    |
| HOT064                               | <i>Streptococcus sp._Oral_Taxon_064</i> | 0                                                                        | 0.1  | 0.1  | 0.1  | 0.1  | 0.2  | 14.7 | 9.6  | 4.4  | 13.8 | 1    | 1.5  | 0    | 3.9  | 3.1  | 0.2  | 0.1  | 0    | 0    | 0    | 0.1  | 0.16 |

|                                        |                                         |     |     |     |     |     |     |     |     |     |     |     |     |     |     |     |      |      |     |     |      |     |      |
|----------------------------------------|-----------------------------------------|-----|-----|-----|-----|-----|-----|-----|-----|-----|-----|-----|-----|-----|-----|-----|------|------|-----|-----|------|-----|------|
| <b>GGT1784;H<br/>OT734</b>             | <i>Streptococcus pneumoniae</i>         | 0   | 0.3 | 0.1 | 0.5 | 0.1 | 0.5 | 0.4 | 0.8 | 0.2 | 0.7 | 0.1 | 0.3 | 0.1 | 0.2 | 0.7 | 22.1 | 1.9  | 7.9 | 0.9 | 0.1  | 0.3 | 0.02 |
| <b>GGT1484;H<br/>OT291</b>             | <i>Prevotella denticola</i>             | 6.5 | 5.6 | 0   | 0   | 0   | 0   | 0   | 0.5 | 0.9 | 0   | 0   | 0   | 0.2 | 0   | 0   | 0    | 2    | 0.3 | 0   | 0    | 1.4 | 0.01 |
| <b>GGT712</b>                          | <i>Enterobacter sp._str._638</i>        | 0   | 0   | 0   | 0   | 0   | 0   | 0   | 0   | 0   | 0   | 0   | 0.6 | 4.9 | 0   | 0   | 0    | 0    | 0   | 0   | 0    | 0   | 0    |
| <b>GGT62;HOT<br/>171</b>               | <i>Actinomyces sp._Oral_Taxon_171</i>   | 0   | 0   | 4.4 | 0.2 | 11  | 0.2 | 0.7 | 2.3 | 1.9 | 1   | 0.2 | 0.2 | 0.1 | 0   | 0   | 0.2  | 0.1  | 0.1 | 0.9 | 8.4  | 1.1 | 0.59 |
| <b>GGT1809</b>                         | <i>Streptococcus sp._str._2136FA A</i>  | 0.1 | 0.1 | 0   | 0   | 0   | 0   | 0   | 0   | 0   | 0   | 0   | 0   | 0   | 0   | 0   | 2.1  | 18.7 | 9.3 | 2   | 3.3  | 0.1 | 0    |
| <b>GGT1791;H<br/>OT578</b>             | <i>Streptococcus cristatus</i>          | 0   | 0.1 | 1.1 | 5.5 | 0   | 5.7 | 0.4 | 0.8 | 0.6 | 0.6 | 0.5 | 1   | 2.1 | 1.7 | 0.8 | 0.9  | 2    | 1.3 | 0.1 | 0.1  | 4   | 3.18 |
| <b>GGT1787;H<br/>OT398;HOT6<br/>77</b> | <i>Streptococcus mitis</i>              | 0   | 0.4 | 0.4 | 0.4 | 0.1 | 2   | 0.7 | 1.2 | 0.5 | 0.3 | 0.8 | 4.2 | 0.6 | 2.4 | 1.2 | 0.3  | 1.1  | 1.3 | 0.3 | 0.3  | 3.7 | 0.19 |
| <b>GGT1795;H<br/>OT755</b>             | <i>Streptococcus salivarius</i>         | 0   | 0   | 0.1 | 0.1 | 0.1 | 0.4 | 2.7 | 4.8 | 0.5 | 2   | 0   | 0.1 | 0.1 | 0   | 0.1 | 0    | 0.4  | 0   | 1.3 | 3.4  | 0.1 | 0.19 |
| <b>HOT071</b>                          | <i>Streptococcus sp._Oral_Taxon_071</i> | 1.1 | 1.3 | 0   | 0.9 | 0   | 0.7 | 0.2 | 0.2 | 0.3 | 0.4 | 0.1 | 2.4 | 0.3 | 0   | 0   | 3.2  | 0.2  | 0.1 | 1.1 | 1.7  | 0.7 | 1.45 |
| <b>GGT1819;H<br/>OT411</b>             | <i>Streptococcus parasanguinis_1</i>    | 0   | 0   | 0   | 0   | 0.1 | 0.6 | 0.6 | 2.6 | 0.3 | 0.7 | 0   | 0.3 | 0.1 | 0.2 | 0.7 | 0    | 0.8  | 0.3 | 2.5 | 6.1  | 0.1 | 0.46 |
| <b>HOT170</b>                          | <i>Actinomyces sp._Oral_Taxon_170</i>   | 0   | 0.1 | 9.8 | 1.9 | 4.1 | 0.3 | 0.2 | 0.2 | 0.2 | 0.1 | 2.5 | 4.6 | 0   | 0   | 0   | 0    | 0.1  | 0   | 0   | 0    | 1.4 | 0.02 |
| <b>HOT768</b>                          | <i>Streptococcus sobrinus</i>           | 0   | 0   | 0   | 0.3 | 2.1 | 0   | 0   | 0   | 0   | 0   | 0   | 0   | 0   | 0   | 0   | 0    | 0    | 0   | 4.7 | 17.5 | 0   | 0    |
| <b>GGT1483;H<br/>OT469</b>             | <i>Prevotella melaninogenica</i>        | 8.1 | 6.4 | 0.2 | 0.7 | 0   | 1.8 | 0   | 0.6 | 2.2 | 0   | 0   | 0.9 | 0.1 | 0.1 | 0.1 | 0.1  | 0    | 0   | 0   | 0.1  | 0.1 | 0.23 |
| <b>GGT1300;H<br/>OT682</b>             | <i>Neisseria mucosa</i>                 | 0   | 0.1 | 0.1 | 0.4 | 0   | 0.5 | 0   | 0.1 | 0   | 0   | 0   | 0   | 0.1 | 0.1 | 0.2 | 3.1  | 0.2  | 2   | 0   | 0    | 4.6 | 0.8  |
| <b>HOT448</b>                          | <i>Actinomyces sp._Oral_Taxon_448</i>   | 0   | 0.2 | 0.2 | 0   | 0.2 | 0.2 | 2.1 | 3   | 1.9 | 3.5 | 0   | 0.5 | 0.4 | 0.1 | 0   | 0.8  | 0.9  | 5.6 | 0.4 | 1.2  | 1.3 | 0.03 |
| <b>HOT169</b>                          | <i>Actinomyces sp._Oral_Taxon_169</i>   | 0.1 | 0.8 | 0.9 | 0.3 | 0.5 | 0.2 | 0.4 | 0   | 0   | 0   | 0   | 0   | 0   | 0.2 | 0.4 | 1.9  | 0.2  | 0.3 | 0.2 | 0.4  | 0.4 | 2.19 |
| <b>GGT1025;H<br/>OT716</b>             | <i>Lactobacillus paracasei</i>          | 0.1 | 0   | 0.2 | 0   | 0   | 0   | 0   | 0   | 0   | 0   | 0   | 0   | 0   | 0   | 0.1 | 0    | 0    | 0   | 0   | 0    | 0   | 0.04 |
| <b>GGT1988;H<br/>OT717</b>             | <i>Variovorax paradoxus</i>             | 26  | 0   | 0   | 0   | 0   | 0   | 0   | 0   | 0   | 0   | 0   | 0   | 0   | 0   | 0   | 0    | 0    | 0   | 0   | 0    | 0   | 0    |

|                              |                                            |      |     |     |     |     |     |     |     |     |     |     |     |     |     |     |     |     |     |      |     |     |      |
|------------------------------|--------------------------------------------|------|-----|-----|-----|-----|-----|-----|-----|-----|-----|-----|-----|-----|-----|-----|-----|-----|-----|------|-----|-----|------|
| <b>HOT070</b>                | <i>Streptococcus sp._Oral_Taxon_070</i>    | 0    | 0.8 | 0   | 0   | 0   | 0.7 | 0.1 | 0.3 | 0.1 | 0.1 | 0   | 0   | 0   | 0   | 0.2 | 0   | 0   | 0   | 0    | 0   | 0   | 0.01 |
| <b>HOT058</b>                | <i>Streptococcus sp._Oral_Taxon_058</i>    | 0    | 0   | 0.4 | 0.9 | 0.1 | 1.6 | 0.3 | 0.1 | 0   | 0   | 0   | 0   | 1.1 | 0.5 | 0.2 | 0.2 | 1   | 0.2 | 0.1  | 0   | 0.3 | 0.48 |
| <b>GGT378;HOT623</b>         | <i>Campylobacter gracilis</i>              | 1.3  | 1.3 | 0.1 | 0.2 | 0   | 0.1 | 0   | 0.7 | 0.6 | 0.1 | 0.5 | 2.4 | 0.7 | 0.5 | 0   | 1   | 0.4 | 0.9 | 0.5  | 3   | 0.2 | 0.07 |
| <b>GGT866;HOT718;HOT826</b>  | <i>Haemophilus parainfluenzae</i>          | 0.3  | 0.4 | 4.4 | 1.5 | 3.2 | 1.2 | 0   | 0.2 | 0   | 0   | 0.1 | 0.4 | 0.3 | 0.4 | 0.3 | 0.1 | 0.1 | 0.1 | 0.2  | 0.2 | 0.5 | 0.14 |
| <b>GGT1308;HOT476;HOT610</b> | <i>Neisseria flavescens/subflava</i>       | 0    | 0.1 | 0.2 | 2.5 | 0.1 | 0.1 | 0   | 0.1 | 0.1 | 0   | 0   | 0.1 | 1.4 | 6.6 | 1.7 | 0.1 | 0   | 0   | 0    | 0   | 0.3 | 0.37 |
| <b>GGT1546</b>               | <i>Pseudomonas antarctica</i>              | 0    | 0   | 0   | 0   | 0   | 0   | 0   | 0   | 0   | 0   | 0   | 0   | 0   | 0   | 0   | 0   | 0   | 0   | 19.8 | 0   | 0   | 0    |
| <b>GGT807;HOT420</b>         | <i>Fusobacterium nucleatum_ss_animalis</i> | 12.4 | 2.4 | 0   | 0.1 | 0   | 0.1 | 0   | 0.2 | 0   | 0   | 0   | 0   | 0   | 0   | 0   | 0.1 | 0   | 0   | 0.1  | 0   | 0.1 | 0    |
| <b>HOT191</b>                | <i>Propionibacterium acidifaciens</i>      | 0    | 0   | 0.2 | 0   | 0.3 | 0   | 0.2 | 2.7 | 2.6 | 0.9 | 0   | 0   | 0.1 | 0   | 0   | 3.1 | 0.5 | 2.1 | 0.1  | 0.2 | 0   | 0    |
| <b>HOT065</b>                | <i>Streptococcus sp._Oral_Taxon_065</i>    | 0    | 0   | 0.4 | 0.3 | 0.4 | 0.8 | 0   | 1   | 0.3 | 0.1 | 0.1 | 0.3 | 0.1 | 0.1 | 0.8 | 0   | 0   | 0   | 0    | 0.3 | 0.1 | 0.34 |
| <b>HOT279</b>                | <i>Porphyromonas sp._Oral_Taxon_279</i>    | 0    | 0   | 0.1 | 0.3 | 0   | 1.5 | 0   | 0   | 0   | 0   | 0.1 | 0.1 | 3   | 5.8 | 0.2 | 0   | 0.1 | 0.1 | 0    | 0   | 1.3 | 0.06 |
| <b>GGT550;HOT666</b>         | <i>Corynebacterium matruchotii</i>         | 0    | 0   | 2   | 1.2 | 0.1 | 0.7 | 0.8 | 0.8 | 0.5 | 0.2 | 0   | 0.1 | 2.1 | 1   | 0.1 | 0.4 | 0.1 | 0.2 | 0    | 0   | 1.2 | 0.53 |
| <b>GGT60;HOT180</b>          | <i>Actinomyces sp._Oral_Taxon_180</i>      | 0.4  | 0.4 | 2.1 | 1.1 | 1.1 | 0.7 | 0   | 0.1 | 0   | 0   | 0.1 | 0.1 | 0.1 | 0.1 | 0.1 | 0   | 0   | 0   | 0    | 0   | 0.1 | 0.01 |
| <b>HOT195</b>                | <i>Scardovia wiggsiae</i>                  | 0.3  | 0.2 | 0.2 | 0   | 0.3 | 0   | 0.2 | 0.3 | 1.3 | 0.5 | 0.1 | 0.6 | 0   | 0   | 0   | 0.1 | 0.1 | 0.6 | 0.7  | 6.7 | 0   | 0.61 |
| <b>GGT1075</b>               | <i>Leptotrichia sp._AF189244.1</i>         | 0    | 0.1 | 0.6 | 0.6 | 0   | 0.2 | 0.4 | 0.5 | 0.2 | 0.3 | 0.1 | 0.5 | 0.3 | 0.3 | 0.1 | 0.1 | 0   | 0.1 | 0    | 0.1 | 2.4 | 0.35 |
| <b>GGT731</b>                | <i>Erwinia aphidicola</i>                  | 0    | 0   | 0   | 0   | 0   | 0   | 0   | 0   | 0   | 0   | 0   | 0   | 0   | 0   | 0   | 0   | 0   | 0   | 0    | 0   | 0   | 0    |
| <b>HOTB66</b>                | <i>Streptococcus sp._Oral_Taxon_B66</i>    | 0    | 0   | 0.7 | 0.8 | 0.4 | 0   | 0   | 0.1 | 0.1 | 0   | 0   | 0.1 | 0.2 | 0   | 0   | 0   | 0   | 0   | 0    | 0   | 0.5 | 0    |
| <b>HOT298</b>                | <i>Prevotella histicola</i>                | 1.9  | 2.7 | 0.1 | 0.3 | 0.1 | 0   | 0.5 | 0.1 | 0.5 | 0.1 | 0   | 0.2 | 0   | 0.1 | 0.1 | 0.2 | 0   | 0.1 | 0    | 0.5 | 0.3 | 1.49 |
| <b>HOT417</b>                | <i>Leptotrichia</i>                        | 0    | 0   | 0.2 | 1.3 | 0   | 1   | 0   | 0.1 | 0   | 0   | 0   | 0.4 | 2.9 | 0.3 | 0   | 0   | 0   | 0.1 | 0    | 0   | 0.6 | 0.22 |

|                       |                                               |     |     |     |     |     |     |     |     |     |     |     |     |     |     |     |     |     |     |      |     |     |      |  |
|-----------------------|-----------------------------------------------|-----|-----|-----|-----|-----|-----|-----|-----|-----|-----|-----|-----|-----|-----|-----|-----|-----|-----|------|-----|-----|------|--|
|                       | <i>sp._Oral_Taxon_417</i>                     |     |     |     |     |     |     |     |     |     |     |     |     |     |     |     |     |     |     |      |     |     |      |  |
| <b>GGT56</b>          | <i>Actinomyces viscosus</i>                   | 0   | 0.4 | 0.3 | 0.2 | 0.1 | 0   | 0.6 | 0.6 | 0.2 | 0.3 | 0   | 0   | 0   | 0   | 0   | 1   | 0.1 | 0.3 | 0    | 0   | 0.3 | 0.14 |  |
| <b>GGT391;HOT337</b>  | <i>Capnocytophaga gingivalis</i>              | 0   | 0   | 0.6 | 0.2 | 0   | 0.2 | 0   | 0   | 0   | 0   | 0.3 | 1.3 | 2.3 | 0.3 | 0   | 0   | 0   | 0.1 | 0    | 0   | 0.4 | 0.01 |  |
| <b>GGT1023</b>        | <i>Lactobacillus delbrueckii</i>              | 0   | 0   | 0   | 0   | 0   | 0   | 0   | 0   | 0   | 0   | 0   | 0   | 0   | 0   | 0   | 0   | 0   | 0   | 11.2 | 0.2 | 0   | 0    |  |
| <b>HOT222</b>         | <i>Leptotrichia wadei</i>                     | 0   | 0.4 | 0.1 | 1.4 | 0   | 0.5 | 0   | 0.2 | 0.1 | 0.1 | 0   | 0   | 0.1 | 0.1 | 0   | 0.1 | 0.1 | 0.3 | 0    | 0.1 | 0.4 | 0    |  |
| <b>HOT183</b>         | <i>Actinobaculum sp._Oral_Taxon_183</i>       | 0   | 0   | 0   | 0   | 0   | 0   | 0.3 | 0.6 | 2.3 | 0.1 | 2.3 | 0.2 | 0.2 | 0   | 0   | 3.2 | 1   | 0.7 | 0    | 0.1 | 0   | 0    |  |
| <b>GGT815;HOT046</b>  | <i>Gemella morbillorum</i>                    | 0.2 | 0.1 | 0   | 0.1 | 0   | 1.5 | 0   | 0   | 0   | 0   | 0   | 0   | 0   | 1.2 | 0.1 | 0   | 0   | 0   | 0    | 0   | 0.5 | 0.02 |  |
| <b>GGT1477;HOT307</b> | <i>Prevotella salivae</i>                     | 0.1 | 0.7 | 0   | 0.2 | 0   | 0   | 0   | 0.1 | 0.9 | 0   | 0   | 0   | 0   | 0   | 0   | 0.1 | 0   | 0   | 0    | 0.1 | 0.1 | 0.09 |  |
| <b>HOT893</b>         | <i>Actinomyces oris</i>                       | 0   | 0   | 2.2 | 0.1 | 5.2 | 0   | 0   | 0   | 0.1 | 0.1 | 0   | 0   | 0   | 0   | 0   | 0   | 0   | 0   | 0    | 0   | 0.1 | 0    |  |
| <b>HOT346</b>         | <i>TM7_[G-1] sp._Oral_Taxon_346</i>           | 0.2 | 1.1 | 0   | 0.4 | 0   | 0.1 | 0   | 0.1 | 0   | 0   | 0   | 0   | 0.7 | 0   | 0   | 0   | 0   | 0   | 0    | 0   | 0   | 0    |  |
| <b>HOT317</b>         | <i>Prevotella sp._Oral_Taxon_317</i>          | 0   | 0   | 0   | 0   | 0   | 0.5 | 0   | 0   | 0   | 0   | 0.2 | 3.9 | 0   | 0.1 | 0   | 0   | 0   | 0   | 0    | 0   | 0.1 | 0    |  |
| <b>GGT1624;HOT587</b> | <i>Rothia dentocariosa</i>                    | 0   | 0   | 0.1 | 0.2 | 0.4 | 1.1 | 1.4 | 0.4 | 0.1 | 0.4 | 0   | 0   | 0   | 0   | 0.1 | 0.8 | 0.2 | 0.1 | 0.2  | 0.2 | 0.2 | 0.11 |  |
| <b>HOT609</b>         | <i>Neisseria flava</i>                        | 0.3 | 2.5 | 0.1 | 0.1 | 0   | 0   | 0   | 0.1 | 0.1 | 0   | 0   | 0   | 0   | 0.8 | 0.8 | 0   | 0   | 0   | 0    | 0   | 0   | 0.06 |  |
| <b>HOT284</b>         | <i>Porphyromonas sp._Oral_Taxon_284</i>       | 0   | 0   | 0.5 | 1.9 | 0   | 0.8 | 0   | 0   | 0   | 0   | 0   | 0   | 0   | 0   | 0   | 0   | 0   | 0   | 0    | 0   | 1.8 | 0.14 |  |
| <b>GGT808;HOT202</b>  | <i>Fusobacterium nucleatum_ss_polymorphum</i> | 0   | 0   | 0.1 | 0.2 | 0   | 0.4 | 0   | 0   | 0   | 0   | 0.1 | 0.8 | 0.7 | 1.8 | 0.1 | 0.2 | 0.1 | 0.4 | 0    | 0   | 0.1 | 0.38 |  |
| <b>GGT1794;HOT543</b> | <i>Streptococcus anginosus</i>                | 3.4 | 1.3 | 0   | 0   | 0   | 0   | 0   | 0   | 0   | 0   | 0.1 | 0.3 | 0   | 0   | 0.1 | 0   | 0   | 0   | 0    | 0   | 0   | 0.01 |  |
| <b>HOT498</b>         | <i>Leptotrichia sp._Oral_Taxon_498</i>        | 0   | 0   | 0   | 0   | 0   | 0   | 0   | 0   | 0   | 0   | 0   | 0   | 0.1 | 0   | 0   | 0   | 0   | 0   | 0    | 0   | 0   | 0    |  |
| <b>GGT1807;HOT638</b> | <i>Streptococcus infantis</i>                 | 0   | 0   | 0.1 | 0.1 | 0.1 | 0.3 | 0   | 0.9 | 0.1 | 0.1 | 0.2 | 0.8 | 0   | 0   | 0   | 0   | 0   | 0   | 0    | 0   | 0.1 | 0.02 |  |
| <b>HOT061</b>         | <i>Streptococcus sp._Oral_Taxon_061</i>       | 0   | 0   | 0.1 | 0.1 | 0.1 | 0.2 | 0   | 0.6 | 0.1 | 0.1 | 0   | 0.2 | 0.1 | 0   | 0.1 | 0   | 0.2 | 0.6 | 0    | 0   | 0   | 0.3  |  |

|                       |                                         |     |     |     |     |     |     |     |     |     |     |     |     |     |     |     |     |     |     |     |     |     |      |
|-----------------------|-----------------------------------------|-----|-----|-----|-----|-----|-----|-----|-----|-----|-----|-----|-----|-----|-----|-----|-----|-----|-----|-----|-----|-----|------|
| <b>HOT283</b>         | <i>Porphyromonas catoniae</i>           | 0   | 0   | 0   | 0   | 0   | 1.7 | 0   | 0   | 0   | 0   | 0.1 | 0   | 0   | 0.5 | 0.2 | 0   | 0   | 0   | 0   | 0   | 0.5 | 0.11 |
| <b>HOT275</b>         | <i>Porphyromonas sp._Oral_Taxon_275</i> | 0   | 0   | 0.2 | 0.6 | 0   | 0   | 0   | 0   | 0   | 0   | 0   | 0   | 0   | 5.7 | 0   | 0   | 0   | 0   | 0   | 0   | 0.1 | 0    |
| <b>GGT1035;HOT608</b> | <i>Lactobacillus fermentum</i>          | 0   | 0   | 0   | 0   | 0   | 0   | 0.1 | 0.1 | 0.2 | 0.4 | 0   | 0   | 0   | 0   | 0   | 0   | 0   | 0   | 2.8 | 1.8 | 0.1 | 0.35 |
| <b>HOT446</b>         | <i>Actinomyces sp._Oral_Taxon_446</i>   | 0   | 0   | 0   | 0   | 0   | 0   | 0   | 0   | 0   | 0   | 0   | 0   | 0   | 0.1 | 0.1 | 0.6 | 0.5 | 0.6 | 0.1 | 1   | 0.3 | 1.1  |
| <b>HOT348</b>         | <i>TM7_[G-1] sp._Oral_Taxon_348</i>     | 0   | 0   | 0   | 0.2 | 0   | 0.2 | 0   | 0   | 0   | 0   | 0   | 0   | 0.5 | 0.3 | 0   | 0   | 0   | 0   | 0   | 0   | 0.7 | 0    |
| <b>GGT1625;HOT188</b> | <i>Rothia aeria</i>                     | 0   | 0   | 0.2 | 0.1 | 0.8 | 0.1 | 0.2 | 0.2 | 0.1 | 0.1 | 0.1 | 0   | 1   | 0   | 0   | 0.1 | 0.1 | 0.1 | 0   | 0   | 0.5 | 0.05 |
| <b>HOT056</b>         | <i>Streptococcus sp._Oral_Taxon_056</i> | 0   | 0   | 0   | 0   | 0   | 0   | 0.1 | 0.1 | 0   | 0   | 2.3 | 0.6 | 0.1 | 0   | 0.1 | 0   | 0.1 | 0   | 0   | 0   | 0.2 | 0    |
| <b>HOT175</b>         | <i>Actinomyces sp._Oral_Taxon_175</i>   | 1   | 1.4 | 0.3 | 0.1 | 0.2 | 0.3 | 0   | 0.1 | 0   | 0   | 0   | 0   | 0   | 0.2 | 0.1 | 0.1 | 0   | 0   | 0   | 0   | 0.2 | 0.01 |
| <b>GGT999;HOT706</b>  | <i>Kingella oralis</i>                  | 0   | 0.1 | 0.2 | 0   | 0   | 0   | 0   | 0   | 0   | 0   | 0   | 0   | 0   | 0   | 0   | 0.1 | 0   | 0   | 0   | 0   | 0.8 | 0.09 |
| <b>GGT397;HOT633</b>  | <i>Cardiobacterium hominis</i>          | 0   | 0   | 0   | 0   | 0   | 0   | 0   | 0   | 0   | 0   | 0.3 | 0.9 | 0.4 | 0   | 0   | 0.3 | 0   | 0.1 | 0   | 0   | 0   | 0    |
| <b>GGT1002;HOT731</b> | <i>Klebsiella pneumoniae</i>            | 0   | 0   | 0   | 0   | 0   | 0   | 0   | 0   | 0   | 0   | 0   | 0   | 0   | 0   | 0   | 0   | 0   | 0   | 0   | 0   | 0   | 0    |
| <b>HOT618</b>         | <i>Actinomyces gerencseriae</i>         | 0   | 0   | 0   | 0   | 0   | 0   | 0   | 0   | 0   | 0   | 0   | 0.1 | 0.3 | 0   | 0   | 0.8 | 0   | 0   | 0   | 0   | 0   | 0    |
| <b>HOT849</b>         | <i>Actinomyces johnsonii</i>            | 0   | 0   | 0.2 | 1   | 0   | 0   | 0   | 0   | 0   | 0   | 0   | 0   | 0.1 | 1.4 | 0.2 | 0   | 0   | 0   | 0   | 0   | 0   | 0.06 |
| <b>HOT596</b>         | <i>Granulicatella elegans</i>           | 0.1 | 0.4 | 0   | 0   | 0   | 0.1 | 0.1 | 0.2 | 0.2 | 0.4 | 0   | 0   | 0   | 0   | 0.2 | 0.2 | 0.1 | 0.2 | 0   | 0   | 0.2 | 0.05 |
| <b>GGT1808;HOT644</b> | <i>Streptococcus intermedius</i>        | 0.5 | 0.4 | 0   | 0   | 0.1 | 0   | 0   | 0   | 0   | 0   | 0   | 0.1 | 0   | 0   | 0   | 0   | 0   | 0.1 | 0.2 | 0.1 | 0   | 0    |
| <b>HOTE75</b>         | <i>Actinomyces sp._Oral_Taxon_E75</i>   | 0.4 | 0.5 | 0   | 0   | 0   | 0   | 0   | 0   | 0   | 0   | 0.2 | 0.2 | 0   | 0   | 0   | 0   | 0   | 0   | 0   | 0   | 0   | 0    |
| <b>GGT46;HOT176</b>   | <i>Actinomyces naeslundii</i>           | 0   | 0   | 0.1 | 0   | 0.1 | 0.1 | 0.2 | 0.1 | 0.1 | 0.5 | 0.1 | 0   | 0.1 | 0.1 | 0   | 0.2 | 0.1 | 0.5 | 0   | 0.1 | 0.1 | 0.02 |
| <b>GGT1027;HOT819</b> | <i>Lactobacillus johnsonii</i>          | 0   | 0   | 0   | 0   | 0   | 0   | 0   | 0   | 0   | 0   | 0.2 | 0   | 0   | 0   | 0   | 0   | 0   | 0   | 0   | 0.1 | 0   | 0    |
| <b>HOTG60</b>         | <i>Prevotella sp._Oral_Taxon</i>        | 0.1 | 0.1 | 0   | 0.3 | 0   | 0   | 0   | 0.1 | 0.3 | 0   | 0   | 0.3 | 0   | 0.2 | 0   | 0   | 0   | 0   | 0   | 0   | 0   | 0.02 |

|                |                                           |     |     |     |     |     |     |     |     |     |     |     |     |     |     |     |     |     |     |     |     |     |      |      |
|----------------|-------------------------------------------|-----|-----|-----|-----|-----|-----|-----|-----|-----|-----|-----|-----|-----|-----|-----|-----|-----|-----|-----|-----|-----|------|------|
|                | _G60                                      |     |     |     |     |     |     |     |     |     |     |     |     |     |     |     |     |     |     |     |     |     |      |      |
| GGT1482;HOT572 | <i>Prevotella veroralis</i>               | 0   | 4.1 | 0   | 0   | 0   | 0   | 0   | 0   | 0   | 0   | 0   | 0   | 0   | 0   | 0   | 0   | 0   | 0   | 0   | 0   | 0   | 0    | 0    |
| HOT494         | <i>Lachnoanaerob aculum saburreum</i>     | 0   | 0   | 0.2 | 0.1 | 0   | 0.1 | 0   | 0   | 0   | 0   | 0   | 1   | 1.6 | 0.1 | 0   | 0   | 0   | 0   | 0   | 0   | 0   | 0.1  | 0.04 |
| HOT286         | <i>Tannerella sp._Oral_Taxon_286</i>      | 0.1 | 0   | 0   | 0.1 | 0   | 0.1 | 0   | 0   | 0   | 0   | 0   | 0.8 | 0.6 | 0.1 | 0   | 0.2 | 0   | 0.1 | 0   | 0   | 0   | 0    | 0.03 |
| HOT300         | <i>Prevotella sp._Oral_Taxon_300</i>      | 0.8 | 0.4 | 0   | 0   | 0   | 0   | 0   | 0   | 0   | 0   | 0   | 0   | 0   | 0   | 0   | 0   | 0.1 | 0   | 0   | 0   | 0   | 0    | 0    |
| GGT675;HOT118  | <i>Dialister invisus</i>                  | 1.7 | 1.2 | 0   | 0   | 0   | 0   | 0   | 0   | 0   | 0   | 0   | 0   | 0   | 0   | 0   | 0   | 0   | 0   | 0   | 0   | 0   | 0.1  | 0    |
| GGT1681;HOT130 | <i>Selenomonas noxia</i>                  | 0   | 0   | 0.1 | 0.1 | 0   | 0   | 0   | 0   | 0.1 | 0   | 0.1 | 0.8 | 0.3 | 0.1 | 0   | 0   | 0   | 0   | 0   | 0   | 0   | 0.1  | 0    |
| GGT155;HOT723  | <i>Atopobium parvulum</i>                 | 0.2 | 0   | 0.3 | 0   | 0.4 | 0   | 0   | 0.1 | 0.1 | 0   | 0   | 0.1 | 0.1 | 0   | 0   | 0   | 0   | 0   | 0   | 0.3 | 0   | 0.28 |      |
| GGT376;HOT575  | <i>Campylobacter concisus</i>             | 0   | 0   | 0.3 | 0.6 | 0.1 | 0.1 | 0   | 0.2 | 0.1 | 0   | 0   | 0.1 | 0.1 | 0.1 | 0   | 0   | 0   | 0.1 | 0   | 0.2 | 0.2 | 0.07 |      |
| GGT1031;HOT615 | <i>Lactobacillus gasseri</i>              | 0.1 | 0.2 | 0   | 0   | 0   | 0   | 0   | 0.2 | 0.4 | 0.7 | 0   | 0   | 0   | 0   | 0   | 0.1 | 0   | 0   | 0.6 | 1.7 | 0   | 0    |      |
| HOT431         | <i>Streptococcus sp._Oral_Taxon_431</i>   | 0   | 0   | 0.1 | 0.1 | 0.1 | 0.3 | 0.1 | 0.7 | 0.1 | 0.5 | 0.1 | 0.2 | 0   | 0   | 0   | 0   | 0   | 0   | 0   | 0   | 0.1 | 0    | 0.02 |
| GGT1078;HOT224 | <i>Leptotrichia hofstadii</i>             | 0   | 0   | 0   | 0.1 | 0   | 0.1 | 0   | 0   | 0   | 0   | 0   | 0.1 | 2.3 | 0   | 0   | 0   | 0   | 0   | 0   | 0   | 0   | 0    | 0.33 |
| GGT388;HOT325  | <i>Capnocytophaga granulosa</i>           | 0   | 0   | 0   | 0   | 0   | 0.1 | 0   | 0   | 0   | 0   | 0.1 | 0.7 | 1.2 | 0   | 0   | 0   | 0   | 0   | 0   | 0   | 0.1 | 0.02 |      |
| HOT329         | <i>Capnocytophaga leadbetteri</i>         | 0   | 0   | 0.1 | 0.1 | 0   | 0.3 | 0   | 0   | 0   | 0   | 0.1 | 0.3 | 0.7 | 0.1 | 0   | 0   | 0   | 0   | 0   | 0   | 0.1 | 0.01 |      |
| GGT157;HOT750  | <i>Atopobium rimae</i>                    | 1.6 | 0.1 | 0   | 0   | 0   | 0   | 0   | 0   | 0   | 0   | 0.1 | 0.1 | 0   | 0   | 0   | 0   | 0   | 0   | 0   | 0   | 0   | 0    | 0.02 |
| GGT816;HOT626  | <i>Gemella haemolysans</i>                | 0.1 | 0.7 | 0   | 0   | 0   | 0.8 | 0   | 0   | 0   | 0   | 0   | 0   | 0   | 0   | 0   | 0   | 0   | 0   | 0   | 0   | 0   | 0.1  | 0.01 |
| HOT458         | <i>Aggregatibacter sp._Oral_Taxon_458</i> | 0   | 0   | 0   | 0.2 | 0   | 0.8 | 0   | 0   | 0   | 0   | 0   | 0   | 0.2 | 0.3 | 0.1 | 0   | 0   | 0   | 0   | 0   | 0   | 0.8  | 0.05 |
| GGT1815;HOT073 | <i>Streptococcus australis</i>            | 0   | 0   | 0   | 0   | 0   | 0.1 | 0   | 0.2 | 0.1 | 0   | 0   | 0.1 | 0.2 | 0   | 0   | 0   | 0   | 0   | 0   | 0   | 0.1 | 0    | 0.03 |
| GGT1485;HOT311 | <i>Prevotella oris</i>                    | 1.9 | 0.6 | 0   | 0   | 0   | 0   | 0   | 0   | 0   | 0   | 0   | 0   | 0   | 0   | 0   | 0   | 0   | 0   | 0   | 0   | 0   | 0    | 0    |

|                       |                                          |     |     |     |     |     |     |   |     |     |   |     |     |     |     |     |     |     |     |     |     |     |      |      |
|-----------------------|------------------------------------------|-----|-----|-----|-----|-----|-----|---|-----|-----|---|-----|-----|-----|-----|-----|-----|-----|-----|-----|-----|-----|------|------|
| <b>GGT1627;HOT681</b> | <i>Rothia mucilaginosa</i>               | 0   | 0   | 0   | 0   | 0.2 | 0.7 | 0 | 0.2 | 0   | 0 | 0   | 0   | 0   | 0   | 0.2 | 0   | 0   | 0   | 0   | 0   | 0   | 0.1  | 0.05 |
| <b>HOT313</b>         | <i>Prevotella sp._Oral_Taxon_313</i>     | 0   | 0   | 0   | 0   | 0   | 0   | 0 | 0   | 0   | 0 | 0   | 0   | 0   | 0   | 0   | 0   | 0   | 0   | 0   | 0   | 0   | 0    | 0    |
| <b>HOT322</b>         | <i>Bergeyella sp._Oral_Taxon_322</i>     | 0   | 0   | 0   | 0.1 | 0   | 0.2 | 0 | 0   | 0   | 0 | 0   | 0.1 | 0.1 | 0.1 | 0.1 | 0   | 0   | 0.1 | 0   | 0   | 0.4 | 0.03 |      |
| <b>HOT540</b>         | <i>Cardiobacterium valvulum</i>          | 0   | 0   | 0   | 0   | 0   | 0   | 0 | 0   | 0   | 0 | 1.1 | 1.1 | 0.2 | 0.1 | 0   | 0   | 0   | 0   | 0   | 0   | 0   | 0    | 0.03 |
| <b>GGT1473;HOT288</b> | <i>Prevotella oulorum</i>                | 0.3 | 0.3 | 0   | 0.1 | 0   | 0   | 0 | 0   | 0   | 0 | 0   | 0.3 | 0   | 0.1 | 0   | 0   | 0   | 0   | 0   | 0   | 0   | 0    | 0    |
| <b>HOTB43</b>         | <i>Porphyromonas sp._Oral_Taxon_B43</i>  | 0   | 0   | 0.1 | 0.2 | 0   | 0   | 0 | 0   | 0   | 0 | 0   | 0   | 0   | 0.1 | 0   | 0   | 0   | 0   | 0   | 0   | 0   | 1    | 0    |
| <b>GGT392;HOT775</b>  | <i>Capnocytophaga sputigena</i>          | 0.5 | 0   | 0.2 | 0.2 | 0   | 0.1 | 0 | 0   | 0   | 0 | 0.1 | 0.1 | 0.1 | 0   | 0   | 0   | 0   | 0   | 0   | 0   | 0.3 | 0.03 |      |
| <b>HOT419</b>         | <i>Moryella sp._Oral_Taxon_419</i>       | 0.1 | 0.2 | 0.1 | 0   | 0   | 0.1 | 0 | 0   | 0   | 0 | 0   | 0   | 0   | 0   | 0   | 0   | 0   | 0   | 0   | 0   | 0   | 0    | 0    |
| <b>HOTF95</b>         | <i>Capnocytophaga sp._Oral_Taxon_F95</i> | 0   | 0   | 0   | 0   | 0   | 0   | 0 | 0   | 0   | 0 | 0.6 | 1.9 | 0   | 0   | 0   | 0   | 0   | 0   | 0   | 0   | 0   | 0    | 0.01 |
| <b>GGT1486;HOT714</b> | <i>Prevotella pallens</i>                | 0   | 0   | 0   | 0   | 0   | 0   | 0 | 0.1 | 0   | 0 | 0   | 0   | 0   | 0   | 0   | 0   | 0   | 0   | 0   | 0   | 0   | 0    | 0.01 |
| <b>HOT335</b>         | <i>Capnocytophaga sp._Oral_Taxon_335</i> | 0   | 0   | 0   | 0   | 0   | 0   | 0 | 0   | 0   | 0 | 0.4 | 1.9 | 0   | 0   | 0   | 0   | 0   | 0   | 0   | 0   | 0   | 0    | 0    |
| <b>GGT2038</b>        | <i>Yersinia mollaretii</i>               | 0   | 0   | 0   | 0   | 0   | 0   | 0 | 0   | 0   | 0 | 0   | 0   | 0.1 | 0   | 0   | 0   | 0   | 0   | 0   | 0   | 0   | 0    | 0    |
| <b>GGT1788;HOT576</b> | <i>Streptococcus constellatus</i>        | 0.4 | 0.4 | 0   | 0   | 0   | 0   | 0 | 0.1 | 0   | 0 | 0   | 0   | 0   | 0   | 0   | 0   | 0   | 0   | 0   | 0   | 0   | 0    | 0    |
| <b>HOT347</b>         | <i>TM7_[G-1] sp._Oral_Taxon_347</i>      | 0   | 0   | 0   | 0   | 0   | 0   | 0 | 0   | 0   | 0 | 0   | 0   | 0   | 0   | 0   | 0.1 | 0   | 0   | 0   | 0   | 0.1 | 0.03 |      |
| <b>GGT53;HOT701</b>   | <i>Actinomyces odontolyticus</i>         | 0   | 0   | 0.2 | 0.1 | 0.2 | 0.1 | 0 | 0.2 | 0.1 | 0 | 0.1 | 0.1 | 0   | 0.1 | 0.1 | 0.1 | 0   | 0   | 0   | 0   | 0.1 | 0.08 |      |
| <b>GGT1022;HOT817</b> | <i>Lactobacillus crispatus</i>           | 0   | 0   | 0   | 0   | 0   | 0   | 0 | 0   | 0   | 0 | 0.2 | 0   | 0   | 0   | 0   | 0   | 0   | 0   | 0   | 0   | 0   | 0    | 0    |
| <b>HOT074</b>         | <i>Streptococcus sp._Oral_Taxon_074</i>  | 0   | 0   | 0   | 0.1 | 0   | 0.2 | 0 | 0.1 | 0   | 0 | 0   | 0.1 | 0   | 0   | 0   | 0   | 0.1 | 0.1 | 0.1 | 0.2 | 0   | 0.02 |      |

|                            |                                                               |     |     |     |     |   |     |   |     |   |     |     |     |     |     |   |     |     |     |   |   |   |     |      |
|----------------------------|---------------------------------------------------------------|-----|-----|-----|-----|---|-----|---|-----|---|-----|-----|-----|-----|-----|---|-----|-----|-----|---|---|---|-----|------|
| <b>GGT706;HO<br/>T577</b>  | <i>Eikenella<br/>corrodens</i>                                | 0   | 0   | 0   | 0   | 0 | 0.1 | 0 | 0   | 0 | 0   | 0.1 | 0.2 | 0   | 0.1 | 0 | 0.1 | 0   | 0.1 | 0 | 0 | 0 | 0   | 0    |
| <b>GGT711</b>              | <i>Enterobacter<br/>cloacae</i>                               | 0   | 0   | 0   | 0   | 0 | 0   | 0 | 0   | 0 | 0   | 0.1 | 0.1 | 0.1 | 0   | 0 | 0   | 0   | 0   | 0 | 0 | 0 | 0   | 0    |
| <b>GGT1811;H<br/>OT721</b> | <i>Streptococcus<br/>parasanguinis_l</i>                      | 0   | 0   | 0   | 0   | 0 | 0.1 | 0 | 0.6 | 0 | 0.1 | 0   | 0   | 0   | 0   | 0 | 0   | 0   | 0   | 0 | 0 | 0 | 0   | 0    |
| <b>HOTH27</b>              | <i>Fusobacterium<br/>sp._Oral_Taxon<br/>_H27</i>              | 0.2 | 0.2 | 0   | 0   | 0 | 0   | 0 | 0   | 0 | 0   | 0   | 0   | 0   | 0   | 0 | 0   | 0   | 0   | 0 | 0 | 0 | 0   | 0    |
| <b>HOT888</b>              | <i>Actinomyces<br/>dentalis</i>                               | 0   | 0   | 0.1 | 0   | 0 | 0.1 | 0 | 0.1 | 0 | 0   | 0   | 0   | 0   | 0   | 0 | 0   | 0.1 | 0   | 0 | 0 | 0 | 0   | 0    |
| <b>GGT1570;H<br/>OT854</b> | <i>Ralstonia<br/>pickettii</i>                                | 0   | 0   | 0   | 0   | 0 | 0   | 0 | 0   | 0 | 0   | 0.1 | 0   | 0   | 0   | 0 | 0   | 0   | 0   | 0 | 0 | 0 | 0   | 0    |
| <b>HOT351</b>              | <i>TM7_[G-3]<br/>sp._Oral_Taxon<br/>_351</i>                  | 0.6 | 0.4 | 0   | 0   | 0 | 0   | 0 | 0   | 0 | 0   | 0   | 0   | 0   | 0   | 0 | 0   | 0   | 0   | 0 | 0 | 0 | 0   | 0    |
| <b>HOT097</b>              | <i>Moryella<br/>sp._Oral_Taxon<br/>_097</i>                   | 0.1 | 0.1 | 0.2 | 0   | 0 | 0.1 | 0 | 0   | 0 | 0   | 0   | 0   | 0   | 0   | 0 | 0   | 0   | 0   | 0 | 0 | 0 | 0   | 0.01 |
| <b>HOT412</b>              | <i>Capnocytophag<br/>a<br/>sp._Oral_Taxon<br/>_412</i>        | 0   | 0   | 0   | 0   | 0 | 0   | 0 | 0   | 0 | 0   | 0   | 0   | 0.9 | 0   | 0 | 0   | 0   | 0   | 0 | 0 | 0 | 0.3 | 0    |
| <b>HOT326</b>              | <i>Capnocytophag<br/>a<br/>sp._Oral_Taxon<br/>_326</i>        | 0   | 0   | 0.1 | 0.1 | 0 | 0   | 0 | 0   | 0 | 0   | 0   | 0.3 | 0   | 0   | 0 | 0   | 0   | 0   | 0 | 0 | 0 | 0   | 0    |
| <b>GGT1074;H<br/>OT563</b> | <i>Leptotrichia<br/>buccalis</i>                              | 0   | 0   | 0   | 0   | 0 | 0.1 | 0 | 0   | 0 | 0   | 0   | 0   | 0.3 | 0   | 0 | 0   | 0   | 0   | 0 | 0 | 0 | 0   | 0.01 |
| <b>GGT1000;H<br/>OT582</b> | <i>Kingella<br/>denitrificans</i>                             | 0.1 | 0   | 0   | 0   | 0 | 0   | 0 | 0   | 0 | 0   | 0   | 0   | 0.4 | 0.1 | 0 | 0   | 0   | 0   | 0 | 0 | 0 | 0   | 0.07 |
| <b>HOT461</b>              | <i>Lactobacillus<br/>sp._Oral_Taxon<br/>_461</i>              | 0.1 | 1.3 | 0   | 0   | 0 | 0   | 0 | 0   | 0 | 0   | 0   | 0   | 0   | 0   | 0 | 0   | 0   | 0   | 0 | 0 | 0 | 0   | 0    |
| <b>HOTD12</b>              | <i>Dietzia<br/>sp._Oral_Taxon<br/>_D12</i>                    | 0   | 0   | 0   | 0   | 0 | 0   | 0 | 0   | 0 | 0   | 0   | 0   | 0   | 0   | 0 | 0   | 0   | 0   | 0 | 0 | 0 | 0   | 0    |
| <b>GGT2084;H<br/>OT155</b> | <i>Veillonellaceae<br/>_[G-1]<br/>sp._Oral_Taxon<br/>_155</i> | 0   | 0   | 0   | 0   | 0 | 0   | 0 | 0.1 | 0 | 0   | 0   | 0   | 0   | 0   | 0 | 0   | 0   | 0   | 0 | 0 | 0 | 0   | 0    |
| <b>GGT1361;H<br/>OT807</b> | <i>Olsenella<br/>sp._Oral_Taxon<br/>_807</i>                  | 0   | 0.1 | 0   | 0   | 0 | 0   | 0 | 0   | 0 | 0   | 0   | 0   | 0.5 | 0   | 0 | 0   | 0   | 0   | 0 | 0 | 0 | 0   | 0    |



|                       |                                          |     |     |     |     |     |     |     |     |     |     |     |     |     |     |   |     |     |     |     |     |     |      |      |
|-----------------------|------------------------------------------|-----|-----|-----|-----|-----|-----|-----|-----|-----|-----|-----|-----|-----|-----|---|-----|-----|-----|-----|-----|-----|------|------|
| <b>HOT131</b>         | <i>Mitsuokella sp._Oral_Taxon_131</i>    | 0   | 0   | 0   | 0   | 0   | 0.1 | 0   | 0   | 0   | 0   | 0   | 0   | 0   | 0.1 | 0 | 0   | 0.1 | 0.1 | 0.2 | 0.1 | 0.1 | 0    | 0    |
| <b>GGT1041;HOT051</b> | <i>Lactobacillus vaginalis</i>           | 0   | 0   | 0   | 0   | 0   | 0   | 0   | 0   | 0   | 0   | 0   | 0   | 0   | 0   | 0 | 0   | 0   | 0   | 0   | 1   | 0.3 | 0    | 0    |
| <b>HOT336</b>         | <i>Capnocytophaga sp._Oral_Taxon_336</i> | 0   | 0   | 0.1 | 0.1 | 0   | 0.1 | 0   | 0   | 0   | 0   | 0   | 0   | 0.3 | 0   | 0 | 0   | 0   | 0.2 | 0   | 0   | 0   | 0    | 0    |
| <b>GGT1362;HOT806</b> | <i>Olsenella profusa</i>                 | 0   | 0   | 0.2 | 0   | 0.3 | 0   | 0   | 0   | 0.1 | 0   | 0   | 0   | 0   | 0   | 0 | 0.1 | 0   | 0   | 0   | 0   | 0   | 0    | 0    |
| <b>GGT573;HOT579</b>  | <i>Cryptobacterium curtum</i>            | 0.1 | 0.3 | 0   | 0   | 0   | 0   | 0   | 0   | 0   | 0   | 0   | 0   | 0.1 | 0   | 0 | 0   | 0   | 0   | 0   | 0   | 0   | 0    | 0.02 |
| <b>GGT1989;HOT524</b> | <i>Veillonella atypica</i>               | 0   | 0   | 0   | 0   | 0   | 0   | 0   | 0   | 0   | 0   | 0   | 0   | 0   | 0   | 0 | 0   | 0   | 0   | 0   | 0.4 | 0   | 0.02 |      |
| <b>HOT473</b>         | <i>Alloprevotella sp._Oral_Taxon_473</i> | 0   | 0.1 | 0   | 0   | 0   | 0.3 | 0   | 0   | 0   | 0   | 0   | 0   | 0   | 0   | 0 | 0   | 0   | 0   | 0   | 0   | 0   | 0    | 0    |
| <b>GGT1818;HOT021</b> | <i>Streptococcus vestibularis</i>        | 0   | 0.2 | 0   | 0   | 0   | 0   | 0   | 0   | 0   | 0   | 0   | 0   | 0   | 0   | 0 | 0   | 0.6 | 0   | 0.1 | 0.2 | 0   | 0.01 |      |
| <b>HOTE78</b>         | <i>Streptococcus sp._Oral_Taxon_E78</i>  | 0   | 0   | 0   | 0   | 0   | 0   | 0.1 | 0   | 0   | 0.1 | 0.2 | 0.1 | 0   | 0   | 0 | 0   | 0   | 0   | 0   | 0   | 0   | 0.1  | 0    |
| <b>GGT806;HOT201</b>  | <i>Fusobacterium periodonticum</i>       | 0   | 0   | 0   | 0.1 | 0   | 0.2 | 0   | 0   | 0   | 0   | 0   | 0   | 0   | 0.1 | 0 | 0   | 0   | 0   | 0   | 0   | 0   | 0    | 0    |
| <b>GGT1114;HOT122</b> | <i>Megasphaera micronuciformis</i>       | 0   | 0.1 | 0   | 0   | 0   | 0   | 0   | 0   | 0.1 | 0   | 0   | 0   | 0   | 0   | 0 | 0   | 0   | 0   | 0   | 0   | 0   | 0.1  | 0.03 |
| <b>HOT739</b>         | <i>Propionibacterium propionicum</i>     | 0   | 0   | 0   | 0   | 0   | 0   | 0   | 0   | 0   | 0   | 0   | 0   | 0   | 0   | 0 | 0.1 | 0.1 | 0   | 0   | 0   | 0   | 0.2  | 0.01 |
| <b>GGT813;HOT757</b>  | <i>Gemella sanguinis</i>                 | 0   | 0   | 0   | 0.1 | 0   | 0.1 | 0   | 0.1 | 0   | 0   | 0   | 0   | 0   | 0   | 0 | 0   | 0   | 0   | 0   | 0   | 0   | 0    | 0.03 |
| <b>HOT660</b>         | <i>Defluviobacter lusatiensis</i>        | 0   | 0   | 0   | 0   | 0   | 0   | 0   | 0   | 0   | 0   | 0   | 0   | 0   | 0   | 0 | 0   | 0   | 0   | 0   | 0   | 0   | 0    | 0    |
| <b>HOT057</b>         | <i>Streptococcus sp._Oral_Taxon_057</i>  | 0   | 0   | 0   | 0   | 0   | 0   | 0   | 0.1 | 0   | 0   | 0   | 0.2 | 0   | 0   | 0 | 0   | 0   | 0   | 0   | 0.1 | 0   | 0    | 0    |
| <b>GGT530;HOT595</b>  | <i>Corynebacterium durum</i>             | 0   | 0   | 0   | 0   | 0   | 0.1 | 0   | 0   | 0   | 0   | 0   | 0   | 0   | 0   | 0 | 0   | 0   | 0   | 0   | 0   | 0   | 0    | 0.19 |
| <b>HOT324</b>         | <i>Capnocytophaga sp._Oral_Taxon_324</i> | 0   | 0   | 0.2 | 0.1 | 0   | 0   | 0   | 0   | 0   | 0   | 0   | 0   | 0   | 0.1 | 0 | 0   | 0   | 0.1 | 0   | 0   | 0   | 0    | 0    |
| <b>GGT1758</b>        | <i>Staphylococcus</i>                    | 0   | 0   | 0   | 0   | 0   | 0   | 0   | 0   | 0   | 0   | 0   | 0   | 0   | 0   | 0 | 0   | 0   | 0   | 0   | 0   | 0   | 0    | 0    |

|                            |                                                               |     |     |     |     |     |     |     |     |     |     |     |     |     |     |   |   |     |   |     |   |     |      |      |  |
|----------------------------|---------------------------------------------------------------|-----|-----|-----|-----|-----|-----|-----|-----|-----|-----|-----|-----|-----|-----|---|---|-----|---|-----|---|-----|------|------|--|
|                            | <i>equorum</i>                                                |     |     |     |     |     |     |     |     |     |     |     |     |     |     |   |   |     |   |     |   |     |      |      |  |
| <b>GGT1367;H<br/>OT457</b> | <i>Oribacterium<br/>sinus</i>                                 | 0   | 0   | 0.1 | 0.1 | 0   | 0   | 0   | 0.1 | 0   | 0   | 0   | 0   | 0   | 0   | 0 | 0 | 0   | 0 | 0   | 0 | 0   | 0.1  | 0.01 |  |
| <b>HOTA58</b>              | <i>Acinetobacter<br/>sp._Oral_Taxon<br/>_A58</i>              | 0   | 0   | 0   | 0   | 0   | 0   | 0   | 0   | 0   | 0   | 0   | 0   | 0   | 0   | 0 | 0 | 0   | 0 | 0   | 0 | 0   | 0    | 0    |  |
| <b>GGT1608</b>             | <i>Riemerella<br/>anatipestifer</i>                           | 0   | 0   | 0   | 0   | 0   | 0   | 0   | 0   | 0   | 0   | 0   | 0   | 0   | 0   | 0 | 0 | 0   | 0 | 0   | 0 | 0   | 0    | 0.31 |  |
| <b>HOT870</b>              | <i>TM7_[G-1]<br/>sp._Oral_Taxon<br/>_870</i>                  | 0   | 0   | 0   | 0   | 0   | 0   | 0   | 0   | 0   | 0   | 0   | 0   | 0   | 0   | 0 | 0 | 0   | 0 | 0   | 0 | 0   | 0    | 0    |  |
| <b>HOT278</b>              | <i>Porphyromonas<br/>sp._Oral_Taxon<br/>_278</i>              | 0   | 0   | 0   | 0   | 0   | 0.7 | 0   | 0   | 0   | 0   | 0   | 0   | 0   | 0   | 0 | 0 | 0   | 0 | 0   | 0 | 0   | 0    | 0    |  |
| <b>HOTA88</b>              | <i>Pseudomonas<br/>mosselii_Oral_T<br/>axon_A88</i>           | 0   | 0   | 0   | 0   | 0   | 0   | 0   | 0   | 0   | 0   | 0.5 | 0   | 0   | 0   | 0 | 0 | 0   | 0 | 0   | 0 | 0   | 0    | 0    |  |
| <b>GGT1304;H<br/>OT598</b> | <i>Neisseria<br/>elongata</i>                                 | 0   | 0   | 0   | 0   | 0   | 0.1 | 0   | 0   | 0   | 0   | 0   | 0   | 0.2 | 0.1 | 0 | 0 | 0   | 0 | 0   | 0 | 0   | 0    | 0.02 |  |
| <b>HOT078</b>              | <i>Oribacterium<br/>sp._Oral_Taxon<br/>_078</i>               | 0.5 | 0.1 | 0   | 0   | 0   | 0   | 0   | 0   | 0   | 0   | 0   | 0   | 0   | 0   | 0 | 0 | 0   | 0 | 0   | 0 | 0.1 | 0    | 0    |  |
| <b>HOT352</b>              | <i>TM7_[G-1]<br/>sp._Oral_Taxon<br/>_352</i>                  | 0   | 0   | 0   | 0   | 0   | 0   | 0   | 0.1 | 0   | 0   | 0   | 0   | 0   | 0   | 0 | 0 | 0   | 0 | 0   | 0 | 0   | 0    | 0.03 |  |
| <b>GGT1488;H<br/>OT299</b> | <i>Prevotella<br/>sp._Oral_Taxon<br/>_299</i>                 | 0   | 0   | 0.1 | 0.1 | 0.1 | 0.1 | 0   | 0   | 0   | 0   | 0   | 0   | 0   | 0   | 0 | 0 | 0   | 0 | 0   | 0 | 0   | 0    | 0.01 |  |
| <b>HOT308</b>              | <i>Alloprevotella<br/>sp._Oral_Taxon<br/>_308</i>             | 0   | 0   | 0   | 0   | 0   | 0.1 | 0   | 0   | 0   | 0   | 0   | 0.1 | 0   | 0   | 0 | 0 | 0   | 0 | 0   | 0 | 0.1 | 0.01 |      |  |
| <b>GGT1536;H<br/>OT612</b> | <i>Pseudomonas<br/>fluorescens</i>                            | 0   | 0   | 0   | 0   | 0   | 0   | 0   | 0   | 0   | 0   | 0   | 0   | 0.1 | 0   | 0 | 0 | 0   | 0 | 0.2 | 0 | 0   | 0    | 0    |  |
| <b>GGT1820</b>             | <i>Streptococcus<br/>sp._str._M334</i>                        | 0   | 0   | 0   | 0   | 0   | 0   | 0.3 | 0   | 0.1 | 0.1 | 0   | 0   | 0   | 0   | 0 | 0 | 0.1 | 0 | 0   | 0 | 0   | 0    | 0    |  |
| <b>HOT096</b>              | <i>Lachnospiracea<br/>e_[G-2]<br/>sp._Oral_Taxon<br/>_096</i> | 0   | 0   | 0.5 | 0.1 | 0   | 0   | 0   | 0   | 0   | 0   | 0   | 0   | 0   | 0   | 0 | 0 | 0   | 0 | 0   | 0 | 0   | 0    | 0    |  |
| <b>GGT1490;H<br/>OT289</b> | <i>Prevotella<br/>maculosa</i>                                | 0.4 | 0   | 0   | 0   | 0   | 0   | 0   | 0   | 0   | 0   | 0   | 0   | 0   | 0   | 0 | 0 | 0   | 0 | 0   | 0 | 0   | 0    | 0    |  |
| <b>GGT1498;H<br/>OT466</b> | <i>Alloprevotella<br/>tanneriae</i>                           | 0   | 0   | 0   | 0   | 0   | 0   | 0   | 0   | 0   | 0   | 0   | 0   | 0   | 0   | 0 | 0 | 0   | 0 | 0   | 0 | 0   | 0    | 0    |  |

|                            |                                                  |     |     |     |     |   |     |   |   |   |   |     |     |     |     |   |   |   |   |   |     |     |     |      |
|----------------------------|--------------------------------------------------|-----|-----|-----|-----|---|-----|---|---|---|---|-----|-----|-----|-----|---|---|---|---|---|-----|-----|-----|------|
| <b>GGT1043;H<br/>OT756</b> | <i>Lactobacillus salivarius</i>                  | 0   | 0   | 0   | 0   | 0 | 0   | 0 | 0 | 0 | 0 | 0   | 0   | 0   | 0   | 0 | 0 | 0 | 0 | 0 | 0.3 | 0.2 | 0   | 0    |
| <b>GGT33</b>               | <i>Acinetobacter sp._str._DR1</i>                | 0   | 0   | 0   | 0   | 0 | 0   | 0 | 0 | 0 | 0 | 0   | 0   | 0   | 0   | 0 | 0 | 0 | 0 | 0 | 0   | 0   | 0   | 0.01 |
| <b>GGT1077;H<br/>OT214</b> | <i>Leptotrichia shahii</i>                       | 0   | 0   | 0   | 0   | 0 | 0   | 0 | 0 | 0 | 0 | 0   | 0   | 0   | 0   | 0 | 0 | 0 | 0 | 0 | 0   | 0   | 0   | 0.01 |
| <b>GGT380;HO<br/>T763</b>  | <i>Campylobacter showae</i>                      | 0   | 0   | 0   | 0   | 0 | 0   | 0 | 0 | 0 | 0 | 0   | 0.1 | 0.1 | 0   | 0 | 0 | 0 | 0 | 0 | 0   | 0   | 0   | 0    |
| <b>HOT107</b>              | <i>Lachnoanaerob aculum umeaense</i>             | 0.1 | 0.1 | 0.1 | 0   | 0 | 0   | 0 | 0 | 0 | 0 | 0   | 0.1 | 0   | 0   | 0 | 0 | 0 | 0 | 0 | 0   | 0   | 0   | 0    |
| <b>HOT221</b>              | <i>Leptotrichia sp._Oral_Taxon _221</i>          | 0   | 0   | 0.1 | 0.2 | 0 | 0   | 0 | 0 | 0 | 0 | 0   | 0   | 0   | 0.1 | 0 | 0 | 0 | 0 | 0 | 0   | 0.1 | 0.1 | 0    |
| <b>HOT349</b>              | <i>TM7_[G-1] sp._Oral_Taxon _349</i>             | 0   | 0   | 0   | 0   | 0 | 0   | 0 | 0 | 0 | 0 | 0   | 0   | 0   | 0   | 0 | 0 | 0 | 0 | 0 | 0   | 0   | 0   | 0    |
| <b>HOTE20</b>              | <i>Selenomonas sp._Oral_Taxon _E20</i>           | 0   | 0   | 0   | 0   | 0 | 0   | 0 | 0 | 0 | 0 | 0   | 0   | 0   | 0   | 0 | 0 | 0 | 0 | 0 | 0   | 0   | 0   | 0    |
| <b>HOT100</b>              | <i>Lachnospiraceae_[G-3] sp._Oral_Taxon _100</i> | 0   | 0   | 0   | 0   | 0 | 0   | 0 | 0 | 0 | 0 | 0   | 0.1 | 0   | 0   | 0 | 0 | 0 | 0 | 0 | 0   | 0   | 0   | 0    |
| <b>HOT887</b>              | <i>Veillonella denticariosi</i>                  | 0   | 0   | 0   | 0   | 0 | 0   | 0 | 0 | 0 | 0 | 0   | 0   | 0   | 0   | 0 | 0 | 0 | 0 | 0 | 0   | 0   | 0   | 0    |
| <b>HOT215</b>              | <i>Leptotrichia sp._Oral_Taxon _215</i>          | 0   | 0   | 0.1 | 0   | 0 | 0.1 | 0 | 0 | 0 | 0 | 0   | 0   | 0   | 0   | 0 | 0 | 0 | 0 | 0 | 0   | 0   | 0   | 0    |
| <b>GGT1034</b>             | <i>Lactobacillus helveticus</i>                  | 0   | 0   | 0   | 0   | 0 | 0   | 0 | 0 | 0 | 0 | 0.1 | 0   | 0   | 0   | 0 | 0 | 0 | 0 | 0 | 0   | 0   | 0   | 0.01 |
| <b>HOT900</b>              | <i>Bergeyella sp._Oral_Taxon _900</i>            | 0   | 0   | 0   | 0   | 0 | 0   | 0 | 0 | 0 | 0 | 0   | 0   | 0.2 | 0   | 0 | 0 | 0 | 0 | 0 | 0   | 0   | 0   | 0.02 |
| <b>GGT803;HO<br/>T200</b>  | <i>Fusobacterium nucleatum_ss_v incentii</i>     | 0   | 0   | 0   | 0   | 0 | 0   | 0 | 0 | 0 | 0 | 0   | 0   | 0   | 0.3 | 0 | 0 | 0 | 0 | 0 | 0   | 0   | 0   | 0.02 |
| <b>HOT323</b>              | <i>Capnocytophaga sp._Oral_Taxon _323</i>        | 0   | 0   | 0   | 0   | 0 | 0   | 0 | 0 | 0 | 0 | 0   | 0   | 0   | 0   | 0 | 0 | 0 | 0 | 0 | 0   | 0   | 0   | 0    |
| <b>HOTE63</b>              | <i>Actinomyces sp._Oral_Taxon _E63</i>           | 0   | 0   | 0   | 0   | 0 | 0.2 | 0 | 0 | 0 | 0 | 0   | 0   | 0   | 0   | 0 | 0 | 0 | 0 | 0 | 0   | 0   | 0   | 0    |

|                       |                                                                |     |     |   |   |   |     |   |     |   |   |     |     |     |     |     |   |   |   |   |   |   |   |      |
|-----------------------|----------------------------------------------------------------|-----|-----|---|---|---|-----|---|-----|---|---|-----|-----|-----|-----|-----|---|---|---|---|---|---|---|------|
| <b>HOT913</b>         | <i>Alloprevotella</i><br><i>sp._Oral_Taxon</i><br><i>_913</i>  | 0   | 0   | 0 | 0 | 0 | 0   | 0 | 0   | 0 | 0 | 0   | 0   | 0   | 0   | 0   | 0 | 0 | 0 | 0 | 0 | 0 | 0 | 0    |
| <b>HOT886</b>         | <i>Streptococcus</i><br><i>oligofermentan</i><br><i>s</i>      | 0   | 0   | 0 | 0 | 0 | 0   | 0 | 0   | 0 | 0 | 0   | 0   | 0.4 | 0   | 0   | 0 | 0 | 0 | 0 | 0 | 0 | 0 | 0    |
| <b>HOT423</b>         | <i>Streptococcus</i><br><i>sp._Oral_Taxon</i><br><i>_423</i>   | 0   | 0   | 0 | 0 | 0 | 0   | 0 | 0   | 0 | 0 | 0   | 0   | 0   | 0   | 0.1 | 0 | 0 | 0 | 0 | 0 | 0 | 0 | 0    |
| <b>GGT1813</b>        | <i>Streptococcus</i><br><i>sp._Oral_Taxon</i><br><i>_71</i>    | 0   | 0   | 0 | 0 | 0 | 0   | 0 | 0   | 0 | 0 | 0   | 0   | 0   | 0.1 | 0   | 0 | 0 | 0 | 0 | 0 | 0 | 0 | 0    |
| <b>HOT181</b>         | <i>Actinomyces</i><br><i>sp._Oral_Taxon</i><br><i>_181</i>     | 0   | 0   | 0 | 0 | 0 | 0.1 | 0 | 0.1 | 0 | 0 | 0   | 0   | 0   | 0   | 0   | 0 | 0 | 0 | 0 | 0 | 0 | 0 | 0    |
| <b>HOTE28</b>         | <i>Streptococcus</i><br><i>sp._Oral_Taxon</i><br><i>_E28</i>   | 0   | 0   | 0 | 0 | 0 | 0   | 0 | 0   | 0 | 0 | 0   | 0   | 0   | 0   | 0   | 0 | 0 | 0 | 0 | 0 | 0 | 0 | 0    |
| <b>HOTH23</b>         | <i>Selenomonas</i><br><i>sp._Oral_Taxon</i><br><i>_H23</i>     | 0   | 0   | 0 | 0 | 0 | 0   | 0 | 0   | 0 | 0 | 0   | 0   | 0   | 0   | 0   | 0 | 0 | 0 | 0 | 0 | 0 | 0 | 0    |
| <b>HOT769</b>         | <i>Treponema</i><br><i>socranskii_ss_s</i><br><i>ocranskii</i> | 0.2 | 0.1 | 0 | 0 | 0 | 0   | 0 | 0   | 0 | 0 | 0   | 0   | 0   | 0   | 0   | 0 | 0 | 0 | 0 | 0 | 0 | 0 | 0    |
| <b>HOT874</b>         | <i>SR1_[G-1]</i><br><i>sp._Oral_Taxon</i><br><i>_874</i>       | 0   | 0   | 0 | 0 | 0 | 0   | 0 | 0   | 0 | 0 | 0   | 0   | 0   | 0   | 0   | 0 | 0 | 0 | 0 | 0 | 0 | 0 | 0    |
| <b>GGT387;HOT700</b>  | <i>Capnocytophaga</i><br><i>ochracea</i>                       | 0   | 0   | 0 | 0 | 0 | 0   | 0 | 0   | 0 | 0 | 0.1 | 0.3 | 0   | 0.1 | 0   | 0 | 0 | 0 | 0 | 0 | 0 | 0 | 0    |
| <b>GGT1676;HOT151</b> | <i>Selenomonas</i><br><i>sputigena</i>                         | 0.1 | 0   | 0 | 0 | 0 | 0   | 0 | 0   | 0 | 0 | 0   | 0   | 0   | 0   | 0   | 0 | 0 | 0 | 0 | 0 | 0 | 0 | 0    |
| <b>GGT1479;HOT794</b> | <i>Prevotella</i><br><i>multisaccharivorax</i>                 | 0   | 0   | 0 | 0 | 0 | 0   | 0 | 0   | 0 | 0 | 0   | 0   | 0   | 0   | 0   | 0 | 0 | 0 | 0 | 0 | 0 | 0 | 0    |
| <b>GGT1821;HOT728</b> | <i>Streptococcus</i><br><i>peroris</i>                         | 0   | 0   | 0 | 0 | 0 | 0.1 | 0 | 0   | 0 | 0 | 0   | 0   | 0   | 0   | 0   | 0 | 0 | 0 | 0 | 0 | 0 | 0 | 0    |
| <b>GGT1432;HOT111</b> | <i>Parvimonas</i><br><i>micra</i>                              | 0.3 | 0   | 0 | 0 | 0 | 0   | 0 | 0   | 0 | 0 | 0   | 0   | 0   | 0   | 0   | 0 | 0 | 0 | 0 | 0 | 0 | 0 | 0    |
| <b>GGT1302;HOT729</b> | <i>Neisseria</i><br><i>pharyngis</i>                           | 0   | 0   | 0 | 0 | 0 | 0   | 0 | 0   | 0 | 0 | 0   | 0   | 0   | 0   | 0   | 0 | 0 | 0 | 0 | 0 | 0 | 0 | 0.06 |
| <b>HOT487</b>         | <i>Streptococcus</i><br><i>sp._Oral_Taxon</i><br><i>_487</i>   | 0   | 0   | 0 | 0 | 0 | 0.1 | 0 | 0   | 0 | 0 | 0   | 0   | 0   | 0   | 0   | 0 | 0 | 0 | 0 | 0 | 0 | 0 | 0.02 |
| <b>HOT808</b>         | <i>Tannerella</i>                                              | 0.1 | 0   | 0 | 0 | 0 | 0   | 0 | 0   | 0 | 0 | 0   | 0   | 0   | 0   | 0   | 0 | 0 | 0 | 0 | 0 | 0 | 0 | 0    |

|                       |                                           |     |     |   |   |   |     |   |     |     |     |     |     |   |     |   |   |   |   |   |   |   |     |      |
|-----------------------|-------------------------------------------|-----|-----|---|---|---|-----|---|-----|-----|-----|-----|-----|---|-----|---|---|---|---|---|---|---|-----|------|
|                       | <i>sp._Oral_Taxon_808</i>                 |     |     |   |   |   |     |   |     |     |     |     |     |   |     |   |   |   |   |   |   |   |     |      |
| <b>HOTA16</b>         | <i>Corynebacterium sp._Oral_Taxon_A16</i> | 0   | 0   | 0 | 0 | 0 | 0   | 0 | 0.1 | 0.1 | 0   | 0   | 0   | 0 | 0   | 0 | 0 | 0 | 0 | 0 | 0 | 0 | 0   | 0.01 |
| <b>HOT565</b>         | <i>Enterobacter cancerogenus</i>          | 0   | 0   | 0 | 0 | 0 | 0   | 0 | 0   | 0   | 0   | 0.1 | 0   | 0 | 0   | 0 | 0 | 0 | 0 | 0 | 0 | 0 | 0   | 0    |
| <b>GGT1037;HOT818</b> | <i>Lactobacillus reuteri</i>              | 0   | 0   | 0 | 0 | 0 | 0   | 0 | 0   | 0   | 0   | 0   | 0   | 0 | 0   | 0 | 0 | 0 | 0 | 0 | 0 | 0 | 0   | 0    |
| <b>GGT306</b>         | <i>Brevibacillus brevis</i>               | 0   | 0   | 0 | 0 | 0 | 0   | 0 | 0   | 0   | 0   | 0.1 | 0   | 0 | 0   | 0 | 0 | 0 | 0 | 0 | 0 | 0 | 0   | 0    |
| <b>HOT914</b>         | <i>Alloprevotella sp._Oral_Taxon_914</i>  | 0   | 0   | 0 | 0 | 0 | 0.1 | 0 | 0   | 0   | 0   | 0   | 0   | 0 | 0   | 0 | 0 | 0 | 0 | 0 | 0 | 0 | 0   | 0.01 |
| <b>HOT225</b>         | <i>Leptotrichia sp._Oral_Taxon_225</i>    | 0   | 0   | 0 | 0 | 0 | 0   | 0 | 0   | 0   | 0.1 | 0   | 0   | 0 | 0   | 0 | 0 | 0 | 0 | 0 | 0 | 0 | 0   | 0    |
| <b>HOT203</b>         | <i>Fusobacterium sp._Oral_Taxon_203</i>   | 0   | 0.1 | 0 | 0 | 0 | 0   | 0 | 0   | 0   | 0   | 0   | 0   | 0 | 0   | 0 | 0 | 0 | 0 | 0 | 0 | 0 | 0   | 0.02 |
| <b>HOTG67</b>         | <i>Selenomonas sp._Oral_Taxon_G67</i>     | 0   | 0   | 0 | 0 | 0 | 0   | 0 | 0   | 0   | 0   | 0   | 0.2 | 0 | 0   | 0 | 0 | 0 | 0 | 0 | 0 | 0 | 0   | 0    |
| <b>GGT10;HOT343</b>   | <i>Achromobacter xylosoxidans</i>         | 0   | 0   | 0 | 0 | 0 | 0   | 0 | 0   | 0   | 0   | 0   | 0   | 0 | 0   | 0 | 0 | 0 | 0 | 0 | 0 | 0 | 0   | 0    |
| <b>HOTF11</b>         | <i>Streptococcus sp._Oral_Taxon_F11</i>   | 0   | 0   | 0 | 0 | 0 | 0   | 0 | 0   | 0   | 0   | 0   | 0   | 0 | 0   | 0 | 0 | 0 | 0 | 0 | 0 | 0 | 0   | 0.04 |
| <b>GGT1026;HOT749</b> | <i>Lactobacillus rhamnosus</i>            | 0   | 0   | 0 | 0 | 0 | 0   | 0 | 0   | 0   | 0   | 0   | 0   | 0 | 0   | 0 | 0 | 0 | 0 | 0 | 0 | 0 | 0   | 0.03 |
| <b>GGT76;HOT762</b>   | <i>Aggregatibacter segnis</i>             | 0   | 0   | 0 | 0 | 0 | 0   | 0 | 0   | 0   | 0   | 0   | 0   | 0 | 0.1 | 0 | 0 | 0 | 0 | 0 | 0 | 0 | 0   | 0    |
| <b>GGT863;HOT851</b>  | <i>Haemophilus haemolyticus</i>           | 0   | 0   | 0 | 0 | 0 | 0.1 | 0 | 0   | 0   | 0   | 0   | 0   | 0 | 0   | 0 | 0 | 0 | 0 | 0 | 0 | 0 | 0   | 0    |
| <b>HOT912</b>         | <i>Alloprevotella sp._Oral_Taxon_912</i>  | 0   | 0   | 0 | 0 | 0 | 0   | 0 | 0   | 0   | 0   | 0   | 0   | 0 | 0   | 0 | 0 | 0 | 0 | 0 | 0 | 0 | 0   | 0    |
| <b>HOT557</b>         | <i>Eubacterium_[X][G-3] brachy</i>        | 0.2 | 0.1 | 0 | 0 | 0 | 0   | 0 | 0   | 0   | 0   | 0   | 0   | 0 | 0   | 0 | 0 | 0 | 0 | 0 | 0 | 0 | 0   | 0    |
| <b>HOTC21</b>         | <i>Kingella sp._Oral_Taxon_C21</i>        | 0   | 0   | 0 | 0 | 0 | 0   | 0 | 0   | 0   | 0   | 0   | 0   | 0 | 0   | 0 | 0 | 0 | 0 | 0 | 0 | 0 | 0.1 | 0    |
| <b>GGT2;HOT1</b>      | <i>Catonella morbi</i>                    | 0.1 | 0   | 0 | 0 | 0 | 0   | 0 | 0   | 0   | 0   | 0   | 0   | 0 | 0   | 0 | 0 | 0 | 0 | 0 | 0 | 0 | 0   | 0    |



|                       |                                                    |     |     |   |     |   |     |   |   |   |   |   |   |     |   |   |   |   |   |   |   |   |   |   |      |
|-----------------------|----------------------------------------------------|-----|-----|---|-----|---|-----|---|---|---|---|---|---|-----|---|---|---|---|---|---|---|---|---|---|------|
| <b>HOTA46</b>         | <i>Corynebacterium sp._Oral_Taxon_A46</i>          | 0   | 0   | 0 | 0   | 0 | 0.2 | 0 | 0 | 0 | 0 | 0 | 0 | 0   | 0 | 0 | 0 | 0 | 0 | 0 | 0 | 0 | 0 | 0 | 0    |
| <b>GGT1723;HOT678</b> | <i>Solobacterium moorei</i>                        | 0   | 0   | 0 | 0   | 0 | 0   | 0 | 0 | 0 | 0 | 0 | 0 | 0   | 0 | 0 | 0 | 0 | 0 | 0 | 0 | 0 | 0 | 0 | 0    |
| <b>HOTC60</b>         | <i>Manihot esculenta_Oral_Taxon_C60</i>            | 0   | 0   | 0 | 0   | 0 | 0   | 0 | 0 | 0 | 0 | 0 | 0 | 0   | 0 | 0 | 0 | 0 | 0 | 0 | 0 | 0 | 0 | 0 | 0    |
| <b>HOTG62</b>         | <i>Streptococcus sp._Oral_Taxon_G62</i>            | 0   | 0   | 0 | 0   | 0 | 0   | 0 | 0 | 0 | 0 | 0 | 0 | 0   | 0 | 0 | 0 | 0 | 0 | 0 | 0 | 0 | 0 | 0 | 0    |
| <b>GGT1478;HOT693</b> | <i>Prevotella nigrescens</i>                       | 0.1 | 0.1 | 0 | 0   | 0 | 0   | 0 | 0 | 0 | 0 | 0 | 0 | 0   | 0 | 0 | 0 | 0 | 0 | 0 | 0 | 0 | 0 | 0 | 0    |
| <b>HOT085</b>         | <i>Clostridiales_[F-2][G-2] sp._Oral_Taxon_085</i> | 0   | 0.1 | 0 | 0   | 0 | 0   | 0 | 0 | 0 | 0 | 0 | 0 | 0   | 0 | 0 | 0 | 0 | 0 | 0 | 0 | 0 | 0 | 0 | 0    |
| <b>GGT1680;HOT149</b> | <i>Selenomonas sp._Oral_Taxon_149</i>              | 0   | 0   | 0 | 0   | 0 | 0   | 0 | 0 | 0 | 0 | 0 | 0 | 0   | 0 | 0 | 0 | 0 | 0 | 0 | 0 | 0 | 0 | 0 | 0    |
| <b>HOTG30</b>         | <i>Veillonella sp._Oral_Taxon_G30</i>              | 0   | 0   | 0 | 0   | 0 | 0   | 0 | 0 | 0 | 0 | 0 | 0 | 0   | 0 | 0 | 0 | 0 | 0 | 0 | 0 | 0 | 0 | 0 | 0    |
| <b>GGT673;HOT736</b>  | <i>Dialister pneumosintes</i>                      | 0   | 0   | 0 | 0   | 0 | 0   | 0 | 0 | 0 | 0 | 0 | 0 | 0   | 0 | 0 | 0 | 0 | 0 | 0 | 0 | 0 | 0 | 0 | 0    |
| <b>HOT414</b>         | <i>Actinomyces sp._Oral_Taxon_414</i>              | 0   | 0   | 0 | 0.1 | 0 | 0   | 0 | 0 | 0 | 0 | 0 | 0 | 0   | 0 | 0 | 0 | 0 | 0 | 0 | 0 | 0 | 0 | 0 | 0    |
| <b>HOT781</b>         | <i>Prevotella saccharolytica</i>                   | 0   | 0   | 0 | 0   | 0 | 0   | 0 | 0 | 0 | 0 | 0 | 0 | 0   | 0 | 0 | 0 | 0 | 0 | 0 | 0 | 0 | 0 | 0 | 0    |
| <b>HOT671</b>         | <i>Actinomyces meyeri</i>                          | 0   | 0.1 | 0 | 0   | 0 | 0   | 0 | 0 | 0 | 0 | 0 | 0 | 0   | 0 | 0 | 0 | 0 | 0 | 0 | 0 | 0 | 0 | 0 | 0    |
| <b>GGT724;HOT803</b>  | <i>Enterococcus italicus</i>                       | 0   | 0   | 0 | 0   | 0 | 0   | 0 | 0 | 0 | 0 | 0 | 0 | 0   | 0 | 0 | 0 | 0 | 0 | 0 | 0 | 0 | 0 | 0 | 0.16 |
| <b>GGT1497;HOT665</b> | <i>Prevotella marshii</i>                          | 0.1 | 0   | 0 | 0   | 0 | 0   | 0 | 0 | 0 | 0 | 0 | 0 | 0   | 0 | 0 | 0 | 0 | 0 | 0 | 0 | 0 | 0 | 0 | 0    |
| <b>GGT61;HOT178</b>   | <i>Actinomyces sp._Oral_Taxon_178</i>              | 0   | 0   | 0 | 0   | 0 | 0   | 0 | 0 | 0 | 0 | 0 | 0 | 0.1 | 0 | 0 | 0 | 0 | 0 | 0 | 0 | 0 | 0 | 0 | 0    |
| <b>GGT2076;HOT274</b> | <i>Bacteroidales_[G-2] sp._Oral_Taxon_274</i>      | 0   | 0.1 | 0 | 0   | 0 | 0   | 0 | 0 | 0 | 0 | 0 | 0 | 0   | 0 | 0 | 0 | 0 | 0 | 0 | 0 | 0 | 0 | 0 | 0    |

|                       |                                           |     |   |   |   |   |   |   |   |   |   |   |   |     |   |   |   |   |   |   |   |   |   |      |
|-----------------------|-------------------------------------------|-----|---|---|---|---|---|---|---|---|---|---|---|-----|---|---|---|---|---|---|---|---|---|------|
| <b>HOTE05</b>         | <i>Streptococcus sp._Oral_Taxon_E05</i>   | 0   | 0 | 0 | 0 | 0 | 0 | 0 | 0 | 0 | 0 | 0 | 0 | 0   | 0 | 0 | 0 | 0 | 0 | 0 | 0 | 0 | 0 | 0    |
| <b>HOT223</b>         | <i>Leptotrichia sp._Oral_Taxon_223</i>    | 0.1 | 0 | 0 | 0 | 0 | 0 | 0 | 0 | 0 | 0 | 0 | 0 | 0   | 0 | 0 | 0 | 0 | 0 | 0 | 0 | 0 | 0 | 0    |
| <b>HOTE83</b>         | <i>Selenomonas sp._Oral_Taxon_E83</i>     | 0   | 0 | 0 | 0 | 0 | 0 | 0 | 0 | 0 | 0 | 0 | 0 | 0   | 0 | 0 | 0 | 0 | 0 | 0 | 0 | 0 | 0 | 0    |
| <b>HOT069</b>         | <i>Streptococcus sp._Oral_Taxon_069</i>   | 0   | 0 | 0 | 0 | 0 | 0 | 0 | 0 | 0 | 0 | 0 | 0 | 0   | 0 | 0 | 0 | 0 | 0 | 0 | 0 | 0 | 0 | 0    |
| <b>GGT1792</b>        | <i>Streptococcus thermophilus</i>         | 0   | 0 | 0 | 0 | 0 | 0 | 0 | 0 | 0 | 0 | 0 | 0 | 0   | 0 | 0 | 0 | 0 | 0 | 0 | 0 | 0 | 0 | 0.02 |
| <b>GGT765</b>         | <i>Faecalibacterium prausnitzii</i>       | 0   | 0 | 0 | 0 | 0 | 0 | 0 | 0 | 0 | 0 | 0 | 0 | 0   | 0 | 0 | 0 | 0 | 0 | 0 | 0 | 0 | 0 | 0    |
| <b>HOT613</b>         | <i>Tannerella forsythia</i>               | 0   | 0 | 0 | 0 | 0 | 0 | 0 | 0 | 0 | 0 | 0 | 0 | 0   | 0 | 0 | 0 | 0 | 0 | 0 | 0 | 0 | 0 | 0    |
| <b>HOT652</b>         | <i>Afipia sp._genomospecies_4</i>         | 0   | 0 | 0 | 0 | 0 | 0 | 0 | 0 | 0 | 0 | 0 | 0 | 0   | 0 | 0 | 0 | 0 | 0 | 0 | 0 | 0 | 0 | 0    |
| <b>HOT108</b>         | <i>Oribacterium sp._Oral_Taxon_108</i>    | 0   | 0 | 0 | 0 | 0 | 0 | 0 | 0 | 0 | 0 | 0 | 0 | 0   | 0 | 0 | 0 | 0 | 0 | 0 | 0 | 0 | 0 | 0    |
| <b>HOT350</b>         | <i>TM7_[G-2] sp._Oral_Taxon_350</i>       | 0   | 0 | 0 | 0 | 0 | 0 | 0 | 0 | 0 | 0 | 0 | 0 | 0   | 0 | 0 | 0 | 0 | 0 | 0 | 0 | 0 | 0 | 0    |
| <b>HOTD95</b>         | <i>Fusobacterium sp._Oral_Taxon_D95</i>   | 0.1 | 0 | 0 | 0 | 0 | 0 | 0 | 0 | 0 | 0 | 0 | 0 | 0   | 0 | 0 | 0 | 0 | 0 | 0 | 0 | 0 | 0 | 0    |
| <b>GGT1481</b>        | <i>Prevotella copri</i>                   | 0   | 0 | 0 | 0 | 0 | 0 | 0 | 0 | 0 | 0 | 0 | 0 | 0   | 0 | 0 | 0 | 0 | 0 | 0 | 0 | 0 | 0 | 0    |
| <b>GGT1352;HOT544</b> | <i>Ochrobactrum anthropi</i>              | 0   | 0 | 0 | 0 | 0 | 0 | 0 | 0 | 0 | 0 | 0 | 0 | 0   | 0 | 0 | 0 | 0 | 0 | 0 | 0 | 0 | 0 | 0    |
| <b>GGT1678;HOT125</b> | <i>Selenomonas flueggei</i>               | 0   | 0 | 0 | 0 | 0 | 0 | 0 | 0 | 0 | 0 | 0 | 0 | 0   | 0 | 0 | 0 | 0 | 0 | 0 | 0 | 0 | 0 | 0    |
| <b>GGT710</b>         | <i>Enterobacter sp._str._HCB</i>          | 0   | 0 | 0 | 0 | 0 | 0 | 0 | 0 | 0 | 0 | 0 | 0 | 0   | 0 | 0 | 0 | 0 | 0 | 0 | 0 | 0 | 0 | 0    |
| <b>HOTH38</b>         | <i>Cardiobacterium sp._Oral_Taxon_H38</i> | 0   | 0 | 0 | 0 | 0 | 0 | 0 | 0 | 0 | 0 | 0 | 0 | 0.1 | 0 | 0 | 0 | 0 | 0 | 0 | 0 | 0 | 0 | 0    |
| <b>GGT200</b>         | <i>Bacteroides fragilis</i>               | 0   | 0 | 0 | 0 | 0 | 0 | 0 | 0 | 0 | 0 | 0 | 0 | 0   | 0 | 0 | 0 | 0 | 0 | 0 | 0 | 0 | 0 | 0    |



|               |                                           |             |             |             |             |             |             |             |             |             |             |             |             |             |             |             |            |             |             |             |             |             |             |              |   |
|---------------|-------------------------------------------|-------------|-------------|-------------|-------------|-------------|-------------|-------------|-------------|-------------|-------------|-------------|-------------|-------------|-------------|-------------|------------|-------------|-------------|-------------|-------------|-------------|-------------|--------------|---|
| GGT256;HOT588 | <i>Bifidobacterium dentium</i>            | 0           | 0           | 0           | 0           | 0           | 0           | 0           | 0           | 0           | 0           | 0           | 0           | 0           | 0           | 0           | 0          | 0           | 0           | 0           | 0           | 0           | 0           | 0            | 0 |
| HOTE49        | <i>Aggregatibacter sp._Oral_Taxon_E49</i> | 0           | 0           | 0           | 0           | 0           | 0           | 0           | 0           | 0           | 0           | 0           | 0           | 0.1         | 0           | 0           | 0          | 0           | 0           | 0           | 0           | 0           | 0           | 0            | 0 |
| HOT213        | <i>Leptotrichia hongkongensis</i>         | 0           | 0           | 0           | 0           | 0           | 0           | 0           | 0           | 0           | 0           | 0           | 0           | 0           | 0           | 0           | 0          | 0           | 0           | 0           | 0           | 0           | 0           | 0            | 0 |
| GGT918        | <i>Halomonas sp._str._HTNK1</i>           | 0           | 0           | 0           | 0           | 0           | 0           | 0           | 0           | 0           | 0           | 0           | 0           | 0           | 0           | 0           | 0          | 0           | 0           | 0           | 0           | 0           | 0           | 0            | 0 |
| HOT866        | <i>Actinomyces graevenitzi</i>            | 0           | 0           | 0           | 0           | 0           | 0           | 0           | 0           | 0           | 0           | 0           | 0           | 0           | 0           | 0           | 0          | 0           | 0           | 0           | 0           | 0           | 0           | 0            | 0 |
| HOT600        | <i>Prevotella enoecca</i>                 | 0           | 0           | 0           | 0           | 0           | 0           | 0           | 0           | 0           | 0           | 0           | 0           | 0           | 0           | 0           | 0          | 0           | 0           | 0           | 0           | 0           | 0           | 0            | 0 |
|               | <b>Column Sum</b>                         | <b>99.9</b> | <b>99.9</b> | <b>99.5</b> | <b>99.9</b> | <b>98.8</b> | <b>99.5</b> | <b>99.8</b> | <b>99.8</b> | <b>99.4</b> | <b>99.9</b> | <b>99.9</b> | <b>99.8</b> | <b>99.9</b> | <b>99.8</b> | <b>99.8</b> | <b>100</b> | <b>99.8</b> | <b>99.9</b> | <b>99.9</b> | <b>99.8</b> | <b>99.9</b> | <b>99.8</b> | <b>99.86</b> |   |

| Relative abundance $\geq 0.1$ |                                       | Diseased (AWSL) occlusal surfaces (bacterial microbiome from each surface sampled) |      |      |      |      |      |      |      |      |      |      |      |     |      |      |      |      |      |      |      |      |      |      |      |  |
|-------------------------------|---------------------------------------|------------------------------------------------------------------------------------|------|------|------|------|------|------|------|------|------|------|------|-----|------|------|------|------|------|------|------|------|------|------|------|--|
| Taxon_ID                      | Species                               | 137                                                                                | 147  | 217  | 227  | 247  | 327  | 417  | 427  | 437  | 447  | 617  | 627  | 737 | 817  | 827  | 917  | 927  | 937  | 1017 | 1027 | 1117 | 1127 | 1137 | 1237 |  |
| GGT1;HOT534                   | <i>Granulicatella paradiacens</i>     | 5.2                                                                                | 9.2  | 3.5  | 19.3 | 3.1  | 16.6 | 29.7 | 11.1 | 47.7 | 30.5 | 4.5  | 9.8  | 5.7 | 23   | 27.6 | 20.6 | 9.3  | 29.6 | 0.9  | 5.8  | 11.9 | 10.6 | 2.5  | 5.5  |  |
| GGT1799;HOT86                 | <i>Streptococcus mutans</i>           | 6.9                                                                                | 26.2 | 0.6  | 1    | 5.8  | 0.3  | 3.9  | 19.8 | 5.3  | 11   | 1.5  | 0.4  | 0.3 | 2.8  | 2.8  | 5.7  | 26.1 | 10.8 | 0.9  | 0.8  | 3.6  | 13.3 | 2.4  | 3.7  |  |
| GGT1822                       | <i>Streptococcus sp._str._C300</i>    | 2.4                                                                                | 4.1  | 7.4  | 17   | 14.9 | 19.6 | 7.3  | 4.9  | 4.2  | 3.3  | 5.3  | 5.1  | 0.7 | 4.2  | 11.1 | 6    | 5.5  | 2.8  | 0.4  | 1.1  | 3.3  | 3.6  | 0.2  | 9.1  |  |
| GGT1051;HOT22                 | <i>Lautropia mirabilis</i>            | 2.8                                                                                | 2.2  | 30.4 | 12.7 | 21.9 | 6    | 2.8  | 1.8  | 2.7  | 2.5  | 5.8  | 9.5  | 4.1 | 3.3  | 0.6  | 5    | 0.5  | 2.5  | 0.2  | 0    | 4.1  | 6.1  | 0.8  | 0.1  |  |
| HOTC61                        | <i>Pseudomonas sp._Oral_Taxon_C61</i> | 0                                                                                  | 0    | 0    | 0    | 0    | 0    | 0    | 0    | 0    | 0    | 0    | 0    | 0   | 39.1 | 0    | 0    | 0    | 0    | 0    | 39.3 | 0    | 0    | 0    | 23.7 |  |
| GGT1803;HOT22                 | <i>Streptococcus gordonii</i>         | 1.7                                                                                | 5.5  | 0.6  | 1.5  | 0.4  | 6.7  | 8.7  | 7.2  | 4    | 5.4  | 1.1  | 2.2  | 0.1 | 3.3  | 4.1  | 4.8  | 11.4 | 8.6  | 0    | 0.1  | 3.9  | 2.6  | 0.2  | 9    |  |
| GGT1789;HOT58                 | <i>Streptococcus sanguinis</i>        | 0.7                                                                                | 0.3  | 5.8  | 2.6  | 4.6  | 3.3  | 6    | 4    | 2.6  | 3.3  | 9.7  | 4.5  | 1.7 | 3.2  | 3.2  | 1.9  | 5.8  | 2.6  | 0.7  | 0.4  | 1.2  | 2.1  | 0.5  | 0.2  |  |
| HOT389                        | <i>Abiotrophia defectiva</i>          | 0.8                                                                                | 0.4  | 0.9  | 4.3  | 0.3  | 4.8  | 1.2  | 1.7  | 2    | 4.7  | 0    | 0    | 0   | 0.3  | 0.9  | 0.2  | 0.4  | 0.5  | 0    | 0.1  | 11.5 | 15.1 | 5.8  | 0.1  |  |
| GGT1806;HOT707                | <i>Streptococcus oralis</i>           | 0                                                                                  | 0    | 0.1  | 0.6  | 0.1  | 0.1  | 7.5  | 3.7  | 0.5  | 7.7  | 16.8 | 14.1 | 0   | 0    | 0.1  | 3.1  | 4.2  | 1.7  | 0    | 0    | 10.8 | 0.3  | 0    | 0    |  |

|                                     |                                         |     |     |     |     |     |     |      |     |     |      |      |     |     |      |     |      |      |     |     |      |     |     |     |     |
|-------------------------------------|-----------------------------------------|-----|-----|-----|-----|-----|-----|------|-----|-----|------|------|-----|-----|------|-----|------|------|-----|-----|------|-----|-----|-----|-----|
| <b>HOTE53</b>                       | <i>Veillonella sp._Oral_Taxon_E53</i>   | 1.4 | 4.1 | 7.1 | 1.6 | 8.8 | 3.1 | 1.2  | 1.9 | 2.7 | 1    | 0.6  | 4.8 | 3.7 | 1.6  | 0.1 | 2    | 1.5  | 1.7 | 1.7 | 14.2 | 6.6 | 2.6 | 0.4 | 0.3 |
| <b>GGT1533</b>                      | <i>Pseudomonas putida</i>               | 0   | 0   | 0   | 0   | 0   | 0   | 0    | 0   | 0   | 0    | 36.2 | 0   | 0   | 0    | 0   | 0    | 0    | 0   | 0   | 0    | 0   | 0   | 0   | 0   |
| <b>GGT1312;HOT764</b>               | <i>Neisseria sicca</i>                  | 0.1 | 0.1 | 0.6 | 4.1 | 0   | 0.1 | 0    | 0   | 0   | 0    | 0    | 0   | 2   | 17.2 | 35  | 0    | 0    | 0   | 0   | 0    | 0   | 0   | 0   | 0.1 |
| <b>GGT1991;HOT158;HOT160;HOT161</b> | <i>Veillonella parvula_group</i>        | 0.7 | 2.4 | 4.6 | 1.6 | 6.5 | 1   | 0.6  | 0.8 | 1.1 | 0.5  | 0.7  | 5.5 | 1.7 | 0.7  | 0.1 | 0.9  | 0.4  | 0.3 | 2.6 | 15.5 | 2.8 | 1.3 | 0.1 | 0.1 |
| <b>GGT738</b>                       | <i>Escherichia coli</i>                 | 0   | 0   | 0   | 0   | 0   | 0   | 0    | 0   | 0   | 0    | 0.1  | 0.1 | 0   | 0    | 0   | 0    | 0    | 0   | 0   | 0    | 0   | 0   | 85  | 0.3 |
| <b>GGT32;HOT554</b>                 | <i>Acinetobacter baumannii</i>          | 0   | 0   | 0   | 0   | 0   | 0   | 1.2  | 0   | 0   | 0    | 0    | 0   | 0   | 0    | 0   | 0    | 0    | 0   | 0   | 0    | 0   | 0   | 0   | 0   |
| <b>HOT064</b>                       | <i>Streptococcus sp._Oral_Taxon_064</i> | 0   | 0.1 | 0.1 | 0.1 | 0.1 | 0.2 | 14.7 | 9.6 | 4.4 | 13.8 | 1    | 1.5 | 0   | 3.9  | 3.1 | 0.2  | 0.1  | 0   | 0   | 0    | 0.1 | 0   | 0   | 0.6 |
| <b>GGT1784;HOT734</b>               | <i>Streptococcus pneumoniae</i>         | 0   | 0.3 | 0.1 | 0.5 | 0.1 | 0.5 | 0.4  | 0.8 | 0.2 | 0.7  | 0.1  | 0.3 | 0.1 | 0.2  | 0.7 | 22.1 | 1.9  | 7.9 | 0.9 | 0.1  | 0.3 | 0.1 | 0   | 0.1 |
| <b>GGT1484;HOT291</b>               | <i>Prevotella denticola</i>             | 6.5 | 5.6 | 0   | 0   | 0   | 0   | 0    | 0.5 | 0.9 | 0    | 0    | 0   | 0.2 | 0    | 0   | 0    | 2    | 0.3 | 0   | 0    | 1.4 | 0   | 0   | 5.1 |
| <b>GGT712</b>                       | <i>Enterobacter sp._str._638</i>        | 0   | 0   | 0   | 0   | 0   | 0   | 0    | 0   | 0   | 0    | 0    | 0.6 | 4.9 | 0    | 0   | 0    | 0    | 0   | 0   | 0    | 0   | 0   | 0   | 8   |
| <b>GGT62;HOT171</b>                 | <i>Actinomyces sp._Oral_Taxon_171</i>   | 0   | 0   | 4.4 | 0.2 | 11  | 0.2 | 0.7  | 2.3 | 1.9 | 1    | 0.2  | 0.2 | 0.1 | 0    | 0   | 0.2  | 0.1  | 0.1 | 0.9 | 8.4  | 1.1 | 0.4 | 0.2 | 0.1 |
| <b>GGT1809</b>                      | <i>Streptococcus sp._str._2136 FAA</i>  | 0.1 | 0.1 | 0   | 0   | 0   | 0   | 0    | 0   | 0   | 0    | 0    | 0   | 0   | 0    | 0   | 2.1  | 18.7 | 9.3 | 2   | 3.3  | 0.1 | 0   | 0   | 0   |
| <b>GGT1791;HOT578</b>               | <i>Streptococcus cristatus</i>          | 0   | 0.1 | 1.1 | 5.5 | 0   | 5.7 | 0.4  | 0.8 | 0.6 | 0.6  | 0.5  | 1   | 2.1 | 1.7  | 0.8 | 0.9  | 2    | 1.3 | 0.1 | 0.1  | 4   | 2.8 | 0   | 0.3 |
| <b>GGT1787;HOT398;HOT677</b>        | <i>Streptococcus mitis</i>              | 0   | 0.4 | 0.4 | 0.4 | 0.1 | 2   | 0.7  | 1.2 | 0.5 | 0.3  | 0.8  | 4.2 | 0.6 | 2.4  | 1.2 | 0.3  | 1.1  | 1.3 | 0.3 | 0.3  | 3.7 | 0.8 | 0.1 | 2.3 |
| <b>GGT1795;HOT755</b>               | <i>Streptococcus salivarius</i>         | 0   | 0   | 0.1 | 0.1 | 0.1 | 0.4 | 2.7  | 4.8 | 0.5 | 2    | 0    | 0.1 | 0.1 | 0    | 0.1 | 0    | 0.4  | 0   | 1.3 | 3.4  | 0.1 | 0.4 | 0.1 | 1.4 |

|                             |                                         |     |     |     |     |     |     |     |     |     |     |     |     |     |     |     |     |     |     |      |     |     |     |     |     |
|-----------------------------|-----------------------------------------|-----|-----|-----|-----|-----|-----|-----|-----|-----|-----|-----|-----|-----|-----|-----|-----|-----|-----|------|-----|-----|-----|-----|-----|
| <b>HOT071</b>               | <i>Streptococcus sp._Oral_Taxon_071</i> | 1.1 | 1.3 | 0   | 0.9 | 0   | 0.7 | 0.2 | 0.2 | 0.3 | 0.4 | 0.1 | 2.4 | 0.3 | 0   | 0   | 3.2 | 0.2 | 0.1 | 1.1  | 1.7 | 0.7 | 0.5 | 0   | 2   |
| <b>GGT1819;HOT411</b>       | <i>Streptococcus parasanguinis_II</i>   | 0   | 0   | 0   | 0   | 0.1 | 0.6 | 0.6 | 2.6 | 0.3 | 0.7 | 0   | 0.3 | 0.1 | 0.2 | 0.7 | 0   | 0.8 | 0.3 | 2.5  | 6.1 | 0.1 | 0.1 | 0   | 0.3 |
| <b>HOT170</b>               | <i>Actinomyces sp._Oral_Taxon_170</i>   | 0   | 0.1 | 9.8 | 1.9 | 4.1 | 0.3 | 0.2 | 0.2 | 0.2 | 0.1 | 2.5 | 4.6 | 0   | 0   | 0   | 0   | 0.1 | 0   | 0    | 0   | 1.4 | 0.6 | 0.3 | C   |
| <b>HOT768</b>               | <i>Streptococcus sobrinus</i>           | 0   | 0   | 0   | 0.3 | 2.1 | 0   | 0   | 0   | 0   | 0   | 0   | 0   | 0   | 0   | 0   | 0   | 0   | 4.7 | 17.5 | 0   | 0   | 0   | 0   | 1.1 |
| <b>GGT1483;HOT469</b>       | <i>Prevotella melaninogenica</i>        | 8.1 | 6.4 | 0.2 | 0.7 | 0   | 1.8 | 0   | 0.6 | 2.2 | 0   | 0   | 0.9 | 0.1 | 0.1 | 0.1 | 0.1 | 0   | 0   | 0    | 0.1 | 0.1 | 0.2 | 0   | 0.1 |
| <b>GGT1300;HOT682</b>       | <i>Neisseria mucosa</i>                 | 0   | 0.1 | 0.1 | 0.4 | 0   | 0.5 | 0   | 0.1 | 0   | 0   | 0   | 0   | 0.1 | 0.1 | 0.2 | 3.1 | 0.2 | 2   | 0    | 0   | 4.6 | 6.8 | 0   | 0.1 |
| <b>HOT448</b>               | <i>Actinomyces sp._Oral_Taxon_448</i>   | 0   | 0.2 | 0.2 | 0   | 0.2 | 0.2 | 2.1 | 3   | 1.9 | 3.5 | 0   | 0.5 | 0.4 | 0.1 | 0   | 0.8 | 0.9 | 5.6 | 0.4  | 1.2 | 1.3 | 0.8 | 0   | C   |
| <b>HOT169</b>               | <i>Actinomyces sp._Oral_Taxon_169</i>   | 0.1 | 0.8 | 0.9 | 0.3 | 0.5 | 0.2 | 0.4 | 0   | 0   | 0   | 0   | 0   | 0   | 0.2 | 0.4 | 1.9 | 0.2 | 0.3 | 0.2  | 0.4 | 0.4 | 0.7 | 0.1 | 0.1 |
| <b>GGT1025;HOT716</b>       | <i>Lactobacillus paracasei</i>          | 0.1 | 0   | 0.2 | 0   | 0   | 0   | 0   | 0   | 0   | 0   | 0   | 0   | 0   | 0   | 0.1 | 0   | 0   | 0   | 0    | 0   | 0   | 0   | 0   | C   |
| <b>GGT1988;HOT717</b>       | <i>Variovorax paradoxus</i>             | 26  | 0   | 0   | 0   | 0   | 0   | 0   | 0   | 0   | 0   | 0   | 0   | 0   | 0   | 0   | 0   | 0   | 0   | 0    | 0   | 0   | 0   | 0   | C   |
| <b>HOT070</b>               | <i>Streptococcus sp._Oral_Taxon_070</i> | 0   | 0.8 | 0   | 0   | 0   | 0.7 | 0.1 | 0.3 | 0.1 | 0.1 | 0   | 0   | 0   | 0   | 0.2 | 0   | 0   | 0   | 0    | 0   | 0   | 0   | 0   | 0.4 |
| <b>HOT058</b>               | <i>Streptococcus sp._Oral_Taxon_058</i> | 0   | 0   | 0.4 | 0.9 | 0.1 | 1.6 | 0.3 | 0.1 | 0   | 0   | 0   | 0   | 1.1 | 0.5 | 0.2 | 0.2 | 1   | 0.2 | 0.1  | 0   | 0.3 | 2.3 | 0   | 0.4 |
| <b>GGT378;HOT623</b>        | <i>Campylobacter gracilis</i>           | 1.3 | 1.3 | 0.1 | 0.2 | 0   | 0.1 | 0   | 0.7 | 0.6 | 0.1 | 0.5 | 2.4 | 0.7 | 0.5 | 0   | 1   | 0.4 | 0.9 | 0.5  | 3   | 0.2 | 0.2 | 0   | 0.1 |
| <b>GGT866;HOT718;HOT826</b> | <i>Haemophilus parainfluenzae</i>       | 0.3 | 0.4 | 4.4 | 1.5 | 3.2 | 1.2 | 0   | 0.2 | 0   | 0   | 0.1 | 0.4 | 0.3 | 0.4 | 0.3 | 0.1 | 0.1 | 0.1 | 0.2  | 0.2 | 0.5 | 0.5 | 0   | C   |
| <b>GGT1308;HOT4</b>         | <i>Neisseria flavescens su</i>          | 0   | 0.1 | 0.2 | 2.5 | 0.1 | 0.1 | 0   | 0.1 | 0.1 | 0   | 0   | 0.1 | 1.4 | 6.6 | 1.7 | 0.1 | 0   | 0   | 0    | 0   | 0.3 | 0.2 | 0   | C   |

|                                |                                                         |      |     |     |     |     |     |     |     |     |     |     |     |     |     |     |     |     |     |      |     |     |     |     |      |
|--------------------------------|---------------------------------------------------------|------|-----|-----|-----|-----|-----|-----|-----|-----|-----|-----|-----|-----|-----|-----|-----|-----|-----|------|-----|-----|-----|-----|------|
| <b>76;HOT<br/>610</b>          | <i>bflava</i>                                           |      |     |     |     |     |     |     |     |     |     |     |     |     |     |     |     |     |     |      |     |     |     |     |      |
| <b>GGT154<br/>6</b>            | <i>Pseudomonas<br/>antarctica</i>                       | 0    | 0   | 0   | 0   | 0   | 0   | 0   | 0   | 0   | 0   | 0   | 0   | 0   | 0   | 0   | 0   | 0   | 0   | 19.8 | 0   | 0   | 0   | 0   | 0    |
| <b>GGT807<br/>;HOT42<br/>0</b> | <i>Fusobacteriu<br/>m<br/>nucleatum_ss<br/>animalis</i> | 12.4 | 2.4 | 0   | 0.1 | 0   | 0.1 | 0   | 0.2 | 0   | 0   | 0   | 0   | 0   | 0   | 0   | 0.1 | 0   | 0   | 0.1  | 0   | 0.1 | 0   | 0   | 0.1  |
| <b>HOT191</b>                  | <i>Propionibacte<br/>rium<br/>acidifaciens</i>          | 0    | 0   | 0.2 | 0   | 0.3 | 0   | 0.2 | 2.7 | 2.6 | 0.9 | 0   | 0   | 0.1 | 0   | 0   | 3.1 | 0.5 | 2.1 | 0.1  | 0.2 | 0   | 0.1 | 0   | 0    |
| <b>HOT065</b>                  | <i>Streptococcus<br/>sp._Oral_Taxo<br/>n_065</i>        | 0    | 0   | 0.4 | 0.3 | 0.4 | 0.8 | 0   | 1   | 0.3 | 0.1 | 0.1 | 0.3 | 0.1 | 0.1 | 0.8 | 0   | 0   | 0   | 0    | 0.3 | 0.1 | 0.1 | 0   | 0    |
| <b>HOT279</b>                  | <i>Porphyromon<br/>as<br/>sp._Oral_Taxo<br/>n_279</i>   | 0    | 0   | 0.1 | 0.3 | 0   | 1.5 | 0   | 0   | 0   | 0   | 0.1 | 0.1 | 3   | 5.8 | 0.2 | 0   | 0.1 | 0.1 | 0    | 0   | 1.3 | 1.2 | 0   | 0    |
| <b>GGT550<br/>;HOT66<br/>6</b> | <i>Corynebacteri<br/>um<br/>matruchotii</i>             | 0    | 0   | 2   | 1.2 | 0.1 | 0.7 | 0.8 | 0.8 | 0.5 | 0.2 | 0   | 0.1 | 2.1 | 1   | 0.1 | 0.4 | 0.1 | 0.2 | 0    | 0   | 1.2 | 1.1 | 0   | 0    |
| <b>GGT60;<br/>HOT180</b>       | <i>Actinomyces<br/>sp._Oral_Taxo<br/>n_180</i>          | 0.4  | 0.4 | 2.1 | 1.1 | 1.1 | 0.7 | 0   | 0.1 | 0   | 0   | 0.1 | 0.1 | 0.1 | 0.1 | 0.1 | 0   | 0   | 0   | 0    | 0   | 0.1 | 0.1 | 0   | 0.1  |
| <b>HOT195</b>                  | <i>Scardovia<br/>wiggisiae</i>                          | 0.3  | 0.2 | 0.2 | 0   | 0.3 | 0   | 0.2 | 0.3 | 1.3 | 0.5 | 0.1 | 0.6 | 0   | 0   | 0   | 0.1 | 0.1 | 0.6 | 0.7  | 6.7 | 0   | 0   | 0   | 0.2  |
| <b>GGT107<br/>5</b>            | <i>Leptotrichia<br/>sp._AF189244<br/>.1</i>             | 0    | 0.1 | 0.6 | 0.6 | 0   | 0.2 | 0.4 | 0.5 | 0.2 | 0.3 | 0.1 | 0.5 | 0.3 | 0.3 | 0.1 | 0.1 | 0   | 0.1 | 0    | 0.1 | 2.4 | 3.7 | 0.1 | 0    |
| <b>GGT731</b>                  | <i>Erwinia<br/>aphidicola</i>                           | 0    | 0   | 0   | 0   | 0   | 0   | 0   | 0   | 0   | 0   | 0   | 0   | 0   | 0   | 0   | 0   | 0   | 0   | 0    | 0   | 0   | 0   | 0   | 14.2 |
| <b>HOTB66</b>                  | <i>Streptococcus<br/>sp._Oral_Taxo<br/>n_B66</i>        | 0    | 0   | 0.7 | 0.8 | 0.4 | 0   | 0   | 0.1 | 0.1 | 0   | 0   | 0.1 | 0.2 | 0   | 0   | 0   | 0   | 0   | 0    | 0   | 0.5 | 1.4 | 0.3 | 0    |
| <b>HOT298</b>                  | <i>Prevotella<br/>histicola</i>                         | 1.9  | 2.7 | 0.1 | 0.3 | 0.1 | 0   | 0.5 | 0.1 | 0.5 | 0.1 | 0   | 0.2 | 0   | 0.1 | 0.1 | 0.2 | 0   | 0.1 | 0    | 0.5 | 0.3 | 0.6 | 0   | 0    |
| <b>HOT417</b>                  | <i>Leptotrichia<br/>sp._Oral_Taxo<br/>n_417</i>         | 0    | 0   | 0.2 | 1.3 | 0   | 1   | 0   | 0.1 | 0   | 0   | 0   | 0.4 | 2.9 | 0.3 | 0   | 0   | 0   | 0.1 | 0    | 0   | 0.6 | 0.9 | 0   | 0    |
| <b>GGT56</b>                   | <i>Actinomyces<br/>viscosus</i>                         | 0    | 0.4 | 0.3 | 0.2 | 0.1 | 0   | 0.6 | 0.6 | 0.2 | 0.3 | 0   | 0   | 0   | 0   | 0   | 1   | 0.1 | 0.3 | 0    | 0   | 0.3 | 0.6 | 0   | 0    |
| <b>GGT391<br/>;HOT33<br/>7</b> | <i>Capnocytopha<br/>ga gingivalis</i>                   | 0    | 0   | 0.6 | 0.2 | 0   | 0.2 | 0   | 0   | 0   | 0   | 0.3 | 1.3 | 2.3 | 0.3 | 0   | 0   | 0   | 0.1 | 0    | 0   | 0.4 | 0.4 | 0   | 0    |

|                       |                                                |     |     |     |     |     |     |     |     |     |     |     |     |     |     |     |     |     |     |      |     |     |     |     |     |
|-----------------------|------------------------------------------------|-----|-----|-----|-----|-----|-----|-----|-----|-----|-----|-----|-----|-----|-----|-----|-----|-----|-----|------|-----|-----|-----|-----|-----|
| <b>GGT1023</b>        | <i>Lactobacillus delbrueckii</i>               | 0   | 0   | 0   | 0   | 0   | 0   | 0   | 0   | 0   | 0   | 0   | 0   | 0   | 0   | 0   | 0   | 0   | 0   | 11.2 | 0.2 | 0   | 0   | 0   | C   |
| <b>HOT222</b>         | <i>Leptotrichia wadei</i>                      | 0   | 0.4 | 0.1 | 1.4 | 0   | 0.5 | 0   | 0.2 | 0.1 | 0.1 | 0   | 0   | 0.1 | 0.1 | 0   | 0.1 | 0.1 | 0.3 | 0    | 0.1 | 0.4 | 0.5 | 0   | C   |
| <b>HOT183</b>         | <i>Actinobaculum sp._Oral_Taxo n_183</i>       | 0   | 0   | 0   | 0   | 0   | 0   | 0.3 | 0.6 | 2.3 | 0.1 | 2.3 | 0.2 | 0.2 | 0   | 0   | 3.2 | 1   | 0.7 | 0    | 0.1 | 0   | 0   | 0   | C   |
| <b>GGT815 ;HOT046</b> | <i>Gemella morbillorum</i>                     | 0.2 | 0.1 | 0   | 0.1 | 0   | 1.5 | 0   | 0   | 0   | 0   | 0   | 0   | 0   | 1.2 | 0.1 | 0   | 0   | 0   | 0    | 0   | 0.5 | 0.5 | 0   | C   |
| <b>GGT1477;HOT307</b> | <i>Prevotella salivae</i>                      | 0.1 | 0.7 | 0   | 0.2 | 0   | 0   | 0   | 0.1 | 0.9 | 0   | 0   | 0   | 0   | 0   | 0   | 0.1 | 0   | 0   | 0    | 0.1 | 0.1 | 0.1 | 0   | 0.3 |
| <b>HOT893</b>         | <i>Actinomyces oris</i>                        | 0   | 0   | 2.2 | 0.1 | 5.2 | 0   | 0   | 0   | 0.1 | 0.1 | 0   | 0   | 0   | 0   | 0   | 0   | 0   | 0   | 0    | 0   | 0.1 | 0.5 | 0   | C   |
| <b>HOT346</b>         | <i>TM7_[G-1] sp._Oral_Taxo n_346</i>           | 0.2 | 1.1 | 0   | 0.4 | 0   | 0.1 | 0   | 0.1 | 0   | 0   | 0   | 0   | 0.7 | 0   | 0   | 0   | 0   | 0   | 0    | 0   | 0   | 0   | 0   | 0.9 |
| <b>HOT317</b>         | <i>Prevotella sp._Oral_Taxo n_317</i>          | 0   | 0   | 0   | 0   | 0   | 0.5 | 0   | 0   | 0   | 0   | 0.2 | 3.9 | 0   | 0.1 | 0   | 0   | 0   | 0   | 0    | 0   | 0.1 | 0   | 0   | C   |
| <b>GGT1624;HOT587</b> | <i>Rothia dentocariosa</i>                     | 0   | 0   | 0.1 | 0.2 | 0.4 | 1.1 | 1.4 | 0.4 | 0.1 | 0.4 | 0   | 0   | 0   | 0   | 0.1 | 0.8 | 0.2 | 0.1 | 0.2  | 0.2 | 0.2 | 0.5 | 0.1 | C   |
| <b>HOT609</b>         | <i>Neisseria flava</i>                         | 0.3 | 2.5 | 0.1 | 0.1 | 0   | 0   | 0   | 0.1 | 0.1 | 0   | 0   | 0   | 0   | 0.8 | 0.8 | 0   | 0   | 0   | 0    | 0   | 0   | 0   | 0   | C   |
| <b>HOT284</b>         | <i>Porphyromonas sp._Oral_Taxo n_284</i>       | 0   | 0   | 0.5 | 1.9 | 0   | 0.8 | 0   | 0   | 0   | 0   | 0   | 0   | 0   | 0   | 0   | 0   | 0   | 0   | 0    | 0   | 1.8 | 1.9 | 0   | C   |
| <b>GGT808 ;HOT202</b> | <i>Fusobacterium nucleatum_ss _polymorphum</i> | 0   | 0   | 0.1 | 0.2 | 0   | 0.4 | 0   | 0   | 0   | 0   | 0.1 | 0.8 | 0.7 | 1.8 | 0.1 | 0.2 | 0.1 | 0.4 | 0    | 0   | 0.1 | 0.3 | 0   | C   |
| <b>GGT1794;HOT543</b> | <i>Streptococcus anginosus</i>                 | 3.4 | 1.3 | 0   | 0   | 0   | 0   | 0   | 0   | 0   | 0   | 0.1 | 0.3 | 0   | 0   | 0.1 | 0   | 0   | 0   | 0    | 0   | 0   | 0   | 0   | 0.5 |
| <b>HOT498</b>         | <i>Leptotrichia sp._Oral_Taxo n_498</i>        | 0   | 0   | 0   | 0   | 0   | 0   | 0   | 0   | 0   | 0   | 0   | 0   | 0.1 | 0   | 0   | 0   | 0   | 0   | 0    | 0   | 0   | 0   | 0   | C   |
| <b>GGT1807;HOT638</b> | <i>Streptococcus infantis</i>                  | 0   | 0   | 0.1 | 0.1 | 0.1 | 0.3 | 0   | 0.9 | 0.1 | 0.1 | 0.2 | 0.8 | 0   | 0   | 0   | 0   | 0   | 0   | 0    | 0   | 0.1 | 0   | 0   | C   |

|                       |                                         |     |     |     |     |     |     |     |     |     |     |     |     |     |     |     |     |     |     |     |     |     |     |     |     |
|-----------------------|-----------------------------------------|-----|-----|-----|-----|-----|-----|-----|-----|-----|-----|-----|-----|-----|-----|-----|-----|-----|-----|-----|-----|-----|-----|-----|-----|
| <b>HOT061</b>         | <i>Streptococcus sp._Oral_Taxon_061</i> | 0   | 0   | 0.1 | 0.1 | 0.1 | 0.2 | 0   | 0.6 | 0.1 | 0.1 | 0   | 0.2 | 0.1 | 0   | 0.1 | 0   | 0.2 | 0.6 | 0   | 0   | 0   | 0   | 0   | 0.1 |
| <b>HOT283</b>         | <i>Porphyromonas catoniae</i>           | 0   | 0   | 0   | 0   | 0   | 1.7 | 0   | 0   | 0   | 0   | 0.1 | 0   | 0   | 0.5 | 0.2 | 0   | 0   | 0   | 0   | 0   | 0.5 | 0.3 | 0   | 0   |
| <b>HOT275</b>         | <i>Porphyromonas sp._Oral_Taxon_275</i> | 0   | 0   | 0.2 | 0.6 | 0   | 0   | 0   | 0   | 0   | 0   | 0   | 0   | 0   | 5.7 | 0   | 0   | 0   | 0   | 0   | 0   | 0.1 | 0   | 0   | 0   |
| <b>GGT1035;HOT608</b> | <i>Lactobacillus fermentum</i>          | 0   | 0   | 0   | 0   | 0   | 0   | 0.1 | 0.1 | 0.2 | 0.4 | 0   | 0   | 0   | 0   | 0   | 0   | 0   | 0   | 2.8 | 1.8 | 0.1 | 0   | 0   | 0   |
| <b>HOT446</b>         | <i>Actinomyces sp._Oral_Taxon_446</i>   | 0   | 0   | 0   | 0   | 0   | 0   | 0   | 0   | 0   | 0   | 0   | 0   | 0   | 0.1 | 0.1 | 0.6 | 0.5 | 0.6 | 0.1 | 1   | 0.3 | 0.4 | 0   | 0   |
| <b>HOT348</b>         | <i>TM7_[G-1] sp._Oral_Taxon_348</i>     | 0   | 0   | 0   | 0.2 | 0   | 0.2 | 0   | 0   | 0   | 0   | 0   | 0   | 0.5 | 0.3 | 0   | 0   | 0   | 0   | 0   | 0   | 0.7 | 0.1 | 0   | 0   |
| <b>GGT1625;HOT188</b> | <i>Rothia aerea</i>                     | 0   | 0   | 0.2 | 0.1 | 0.8 | 0.1 | 0.2 | 0.2 | 0.1 | 0.1 | 0.1 | 0   | 1   | 0   | 0   | 0.1 | 0.1 | 0.1 | 0   | 0   | 0.5 | 0.7 | 0   | 0   |
| <b>HOT056</b>         | <i>Streptococcus sp._Oral_Taxon_056</i> | 0   | 0   | 0   | 0   | 0   | 0   | 0.1 | 0.1 | 0   | 0   | 2.3 | 0.6 | 0.1 | 0   | 0.1 | 0   | 0.1 | 0   | 0   | 0   | 0.2 | 0.7 | 0   | 0.1 |
| <b>HOT175</b>         | <i>Actinomyces sp._Oral_Taxon_175</i>   | 1   | 1.4 | 0.3 | 0.1 | 0.2 | 0.3 | 0   | 0.1 | 0   | 0   | 0   | 0   | 0   | 0.2 | 0.1 | 0.1 | 0   | 0   | 0   | 0   | 0.2 | 0.3 | 0   | 0   |
| <b>GGT999;HOT706</b>  | <i>Kingella oralis</i>                  | 0   | 0.1 | 0.2 | 0   | 0   | 0   | 0   | 0   | 0   | 0   | 0   | 0   | 0   | 0   | 0   | 0.1 | 0   | 0   | 0   | 0   | 0.8 | 2.5 | 0   | 0   |
| <b>GGT397;HOT633</b>  | <i>Cardiobacterium hominis</i>          | 0   | 0   | 0   | 0   | 0   | 0   | 0   | 0   | 0   | 0   | 0.3 | 0.9 | 0.4 | 0   | 0   | 0.3 | 0   | 0.1 | 0   | 0   | 0   | 0   | 0   | 0   |
| <b>GGT1002;HOT731</b> | <i>Klebsiella pneumoniae</i>            | 0   | 0   | 0   | 0   | 0   | 0   | 0   | 0   | 0   | 0   | 0   | 0   | 0   | 0   | 0   | 0   | 0   | 0   | 0   | 0   | 0   | 0   | 0   | 0   |
| <b>HOT618</b>         | <i>Actinomyces gerencseriae</i>         | 0   | 0   | 0   | 0   | 0   | 0   | 0   | 0   | 0   | 0   | 0   | 0.1 | 0.3 | 0   | 0   | 0.8 | 0   | 0   | 0   | 0   | 0   | 0   | 0   | 0   |
| <b>HOT849</b>         | <i>Actinomyces johnsonii</i>            | 0   | 0   | 0.2 | 1   | 0   | 0   | 0   | 0   | 0   | 0   | 0   | 0   | 0.1 | 1.4 | 0.2 | 0   | 0   | 0   | 0   | 0   | 0   | 0   | 0   | 0   |
| <b>HOT596</b>         | <i>Granulicatella elegans</i>           | 0.1 | 0.4 | 0   | 0   | 0   | 0.1 | 0.1 | 0.2 | 0.2 | 0.4 | 0   | 0   | 0   | 0   | 0.2 | 0.2 | 0.1 | 0.2 | 0   | 0   | 0.2 | 0.2 | 0.1 | 0.1 |
| <b>GGT1808;HOT6</b>   | <i>Streptococcus intermedius</i>        | 0.5 | 0.4 | 0   | 0   | 0.1 | 0   | 0   | 0   | 0   | 0   | 0   | 0.1 | 0   | 0   | 0   | 0   | 0   | 0   | 0.1 | 0.2 | 0.1 | 0   | 0   | 0.8 |

|                         |                                         |     |     |     |     |     |     |     |     |     |     |     |     |     |     |   |     |     |     |     |     |     |     |     |   |     |
|-------------------------|-----------------------------------------|-----|-----|-----|-----|-----|-----|-----|-----|-----|-----|-----|-----|-----|-----|---|-----|-----|-----|-----|-----|-----|-----|-----|---|-----|
| <b>44</b>               |                                         |     |     |     |     |     |     |     |     |     |     |     |     |     |     |   |     |     |     |     |     |     |     |     |   |     |
| <b>HOTE75</b>           | <i>Actinomyces sp._Oral_Taxon_E75</i>   | 0.4 | 0.5 | 0   | 0   | 0   | 0   | 0   | 0   | 0   | 0   | 0.2 | 0.2 | 0   | 0   | 0 | 0   | 0   | 0   | 0   | 0   | 0   | 0   | 0   | 0 | 1.8 |
| <b>GGT46; HOT176</b>    | <i>Actinomyces naeslundii</i>           | 0   | 0   | 0.1 | 0   | 0.1 | 0.1 | 0.2 | 0.1 | 0.1 | 0.5 | 0.1 | 0   | 0.1 | 0.1 | 0 | 0.2 | 0.1 | 0.5 | 0   | 0.1 | 0.1 | 0   | 0   | 0 | 0   |
| <b>GGT102 7;HOT8 19</b> | <i>Lactobacillus johnsonii</i>          | 0   | 0   | 0   | 0   | 0   | 0   | 0   | 0   | 0   | 0   | 0.2 | 0   | 0   | 0   | 0 | 0   | 0   | 0   | 0   | 0.1 | 0   | 0   | 0   | 0 | 0   |
| <b>HOTG60</b>           | <i>Prevotella sp._Oral_Taxon_G60</i>    | 0.1 | 0.1 | 0   | 0.3 | 0   | 0   | 0   | 0.1 | 0.3 | 0   | 0   | 0.3 | 0   | 0.2 | 0 | 0   | 0   | 0   | 0   | 0   | 0   | 0   | 0   | 0 | 0.1 |
| <b>GGT148 2;HOT5 72</b> | <i>Prevotella veroralis</i>             | 0   | 4.1 | 0   | 0   | 0   | 0   | 0   | 0   | 0   | 0   | 0   | 0   | 0   | 0   | 0 | 0   | 0   | 0   | 0   | 0   | 0   | 0   | 0   | 0 | 0   |
| <b>HOT494</b>           | <i>Lachnoanaerobaculum saburreum</i>    | 0   | 0   | 0.2 | 0.1 | 0   | 0.1 | 0   | 0   | 0   | 0   | 0   | 1   | 1.6 | 0.1 | 0 | 0   | 0   | 0   | 0   | 0   | 0   | 0.1 | 0.1 | 0 | 0   |
| <b>HOT286</b>           | <i>Tannerella sp._Oral_Taxon_286</i>    | 0.1 | 0   | 0   | 0.1 | 0   | 0.1 | 0   | 0   | 0   | 0   | 0   | 0.8 | 0.6 | 0.1 | 0 | 0.2 | 0   | 0.1 | 0   | 0   | 0   | 0   | 0   | 0 | 0   |
| <b>HOT300</b>           | <i>Prevotella sp._Oral_Taxon_300</i>    | 0.8 | 0.4 | 0   | 0   | 0   | 0   | 0   | 0   | 0   | 0   | 0   | 0   | 0   | 0   | 0 | 0   | 0.1 | 0   | 0   | 0   | 0   | 0   | 0   | 0 | 0.2 |
| <b>GGT675 ;HOT11 8</b>  | <i>Dialister invisus</i>                | 1.7 | 1.2 | 0   | 0   | 0   | 0   | 0   | 0   | 0   | 0   | 0   | 0   | 0   | 0   | 0 | 0   | 0   | 0   | 0   | 0   | 0.1 | 0   | 0   | 0 | 0.1 |
| <b>GGT168 1;HOT1 30</b> | <i>Selenomonas noxia</i>                | 0   | 0   | 0.1 | 0.1 | 0   | 0   | 0   | 0   | 0.1 | 0   | 0.1 | 0.8 | 0.3 | 0.1 | 0 | 0   | 0   | 0   | 0   | 0   | 0.1 | 0   | 0   | 0 | 0.1 |
| <b>GGT155 ;HOT72 3</b>  | <i>Atopobium parvulum</i>               | 0.2 | 0   | 0.3 | 0   | 0.4 | 0   | 0   | 0.1 | 0.1 | 0   | 0   | 0.1 | 0.1 | 0   | 0 | 0   | 0   | 0   | 0   | 0   | 0.3 | 0   | 0   | 0 | 0.2 |
| <b>GGT376 ;HOT57 5</b>  | <i>Campylobacter concisus</i>           | 0   | 0   | 0.3 | 0.6 | 0.1 | 0.1 | 0   | 0.2 | 0.1 | 0   | 0   | 0.1 | 0.1 | 0.1 | 0 | 0   | 0   | 0.1 | 0   | 0.2 | 0.2 | 0.2 | 0   | 0 | 0   |
| <b>GGT103 1;HOT6 15</b> | <i>Lactobacillus gasseri</i>            | 0.1 | 0.2 | 0   | 0   | 0   | 0   | 0   | 0.2 | 0.4 | 0.7 | 0   | 0   | 0   | 0   | 0 | 0.1 | 0   | 0   | 0.6 | 1.7 | 0   | 0   | 0   | 0 | 0   |
| <b>HOT431</b>           | <i>Streptococcus sp._Oral_Taxon_431</i> | 0   | 0   | 0.1 | 0.1 | 0.1 | 0.3 | 0.1 | 0.7 | 0.1 | 0.5 | 0.1 | 0.2 | 0   | 0   | 0 | 0   | 0   | 0   | 0   | 0.1 | 0   | 0   | 0   | 0 | 0   |
| <b>GGT107 8;HOT2</b>    | <i>Leptotrichia hofstadii</i>           | 0   | 0   | 0   | 0.1 | 0   | 0.1 | 0   | 0   | 0   | 0   | 0   | 0.1 | 2.3 | 0   | 0 | 0   | 0   | 0   | 0   | 0   | 0   | 0   | 0.1 | 0 | 0   |

|                           |                                           |     |     |     |     |     |     |   |     |     |   |     |     |     |     |     |   |   |     |   |     |     |     |     |     |
|---------------------------|-------------------------------------------|-----|-----|-----|-----|-----|-----|---|-----|-----|---|-----|-----|-----|-----|-----|---|---|-----|---|-----|-----|-----|-----|-----|
| <b>24</b>                 |                                           |     |     |     |     |     |     |   |     |     |   |     |     |     |     |     |   |   |     |   |     |     |     |     |     |
| <b>GGT388<br/>;HOT325</b> | <i>Capnocytophaga granulosa</i>           | 0   | 0   | 0   | 0   | 0   | 0.1 | 0 | 0   | 0   | 0 | 0.1 | 0.7 | 1.2 | 0   | 0   | 0 | 0 | 0   | 0 | 0   | 0.1 | 0.1 | 0   | 0   |
| <b>HOT329</b>             | <i>Capnocytophaga leadbetteri</i>         | 0   | 0   | 0.1 | 0.1 | 0   | 0.3 | 0 | 0   | 0   | 0 | 0.1 | 0.3 | 0.7 | 0.1 | 0   | 0 | 0 | 0   | 0 | 0   | 0.1 | 0   | 0   | 0   |
| <b>GGT157<br/>;HOT750</b> | <i>Atopobium rimae</i>                    | 1.6 | 0.1 | 0   | 0   | 0   | 0   | 0 | 0   | 0   | 0 | 0.1 | 0.1 | 0   | 0   | 0   | 0 | 0 | 0   | 0 | 0   | 0   | 0   | 0   | 0.2 |
| <b>GGT816<br/>;HOT626</b> | <i>Gemella haemolysans</i>                | 0.1 | 0.7 | 0   | 0   | 0   | 0.8 | 0 | 0   | 0   | 0 | 0   | 0   | 0   | 0   | 0   | 0 | 0 | 0   | 0 | 0   | 0.1 | 0.1 | 0   | 0   |
| <b>HOT458</b>             | <i>Aggregatibacter sp._Oral_Taxon_458</i> | 0   | 0   | 0   | 0.2 | 0   | 0.8 | 0 | 0   | 0   | 0 | 0   | 0   | 0.2 | 0.3 | 0.1 | 0 | 0 | 0   | 0 | 0   | 0.8 | 0.4 | 0   | 0   |
| <b>GGT1815;HOT073</b>     | <i>Streptococcus australis</i>            | 0   | 0   | 0   | 0   | 0   | 0.1 | 0 | 0.2 | 0.1 | 0 | 0   | 0.1 | 0.2 | 0   | 0   | 0 | 0 | 0   | 0 | 0.1 | 0   | 0   | 0   | 0   |
| <b>GGT1485;HOT311</b>     | <i>Prevotella oris</i>                    | 1.9 | 0.6 | 0   | 0   | 0   | 0   | 0 | 0   | 0   | 0 | 0   | 0   | 0   | 0   | 0   | 0 | 0 | 0   | 0 | 0   | 0   | 0   | 0   | 0   |
| <b>GGT1627;HOT681</b>     | <i>Rothia mucilaginosa</i>                | 0   | 0   | 0   | 0   | 0.2 | 0.7 | 0 | 0.2 | 0   | 0 | 0   | 0   | 0   | 0   | 0.2 | 0 | 0 | 0   | 0 | 0   | 0.1 | 0.1 | 0   | 0   |
| <b>HOT313</b>             | <i>Prevotella sp._Oral_Taxon_313</i>      | 0   | 0   | 0   | 0   | 0   | 0   | 0 | 0   | 0   | 0 | 0   | 0   | 0   | 0   | 0   | 0 | 0 | 0   | 0 | 0   | 0   | 0   | 0   | 0   |
| <b>HOT322</b>             | <i>Bergeyella sp._Oral_Taxon_322</i>      | 0   | 0   | 0   | 0.1 | 0   | 0.2 | 0 | 0   | 0   | 0 | 0   | 0.1 | 0.1 | 0.1 | 0.1 | 0 | 0 | 0.1 | 0 | 0   | 0.4 | 0.5 | 0.1 | 0   |
| <b>HOT540</b>             | <i>Cardiobacterium valvulum</i>           | 0   | 0   | 0   | 0   | 0   | 0   | 0 | 0   | 0   | 0 | 1.1 | 1.1 | 0.2 | 0.1 | 0   | 0 | 0 | 0   | 0 | 0   | 0   | 0   | 0   | 0   |
| <b>GGT1473;HOT288</b>     | <i>Prevotella oulorum</i>                 | 0.3 | 0.3 | 0   | 0.1 | 0   | 0   | 0 | 0   | 0   | 0 | 0   | 0.3 | 0   | 0.1 | 0   | 0 | 0 | 0   | 0 | 0   | 0   | 0   | 0   | 0.2 |
| <b>HOTB43</b>             | <i>Porphyromonas sp._Oral_Taxon_B43</i>   | 0   | 0   | 0.1 | 0.2 | 0   | 0   | 0 | 0   | 0   | 0 | 0   | 0   | 0   | 0.1 | 0   | 0 | 0 | 0   | 0 | 0   | 1   | 1.2 | 0   | 0   |
| <b>GGT392<br/>;HOT775</b> | <i>Capnocytophaga sputigena</i>           | 0.5 | 0   | 0.2 | 0.2 | 0   | 0.1 | 0 | 0   | 0   | 0 | 0.1 | 0.1 | 0.1 | 0   | 0   | 0 | 0 | 0   | 0 | 0   | 0.3 | 0.4 | 0   | 0   |
| <b>HOT419</b>             | <i>Moryella</i>                           | 0.1 | 0.2 | 0.1 | 0   | 0   | 0.1 | 0 | 0   | 0   | 0 | 0   | 0   | 0   | 0   | 0   | 0 | 0 | 0   | 0 | 0   | 0   | 0   | 0   | 0   |



|                                 |                                                   |     |     |     |     |     |     |   |     |     |     |     |     |     |     |     |     |     |     |     |     |     |     |   |     |
|---------------------------------|---------------------------------------------------|-----|-----|-----|-----|-----|-----|---|-----|-----|-----|-----|-----|-----|-----|-----|-----|-----|-----|-----|-----|-----|-----|---|-----|
|                                 | <i>sp._Oral_Taxo<br/>n_419</i>                    |     |     |     |     |     |     |   |     |     |     |     |     |     |     |     |     |     |     |     |     |     |     |   |     |
| <b>HOTF95</b>                   | <i>Capnocytophaga<br/>sp._Oral_Taxo<br/>n_F95</i> | 0   | 0   | 0   | 0   | 0   | 0   | 0 | 0   | 0   | 0   | 0.6 | 1.9 | 0   | 0   | 0   | 0   | 0   | 0   | 0   | 0   | 0   | 0   | 0 | 0   |
| <b>GGT148<br/>6;HOT7<br/>14</b> | <i>Prevotella<br/>pallens</i>                     | 0   | 0   | 0   | 0   | 0   | 0   | 0 | 0.1 | 0   | 0   | 0   | 0   | 0   | 0   | 0   | 0   | 0   | 0   | 0   | 0   | 0   | 0   | 0 | 0.1 |
| <b>HOT335</b>                   | <i>Capnocytophaga<br/>sp._Oral_Taxo<br/>n_335</i> | 0   | 0   | 0   | 0   | 0   | 0   | 0 | 0   | 0   | 0   | 0.4 | 1.9 | 0   | 0   | 0   | 0   | 0   | 0   | 0   | 0   | 0   | 0   | 0 | 0   |
| <b>GGT203<br/>8</b>             | <i>Yersinia<br/>mollaretii</i>                    | 0   | 0   | 0   | 0   | 0   | 0   | 0 | 0   | 0   | 0   | 0   | 0   | 0.1 | 0   | 0   | 0   | 0   | 0   | 0   | 0   | 0   | 0   | 0 | 0.2 |
| <b>GGT178<br/>8;HOT5<br/>76</b> | <i>Streptococcus<br/>constellatus</i>             | 0.4 | 0.4 | 0   | 0   | 0   | 0   | 0 | 0.1 | 0   | 0   | 0   | 0   | 0   | 0   | 0   | 0   | 0   | 0   | 0   | 0   | 0   | 0   | 0 | 0   |
| <b>HOT347</b>                   | <i>TM7_[G-1]<br/>sp._Oral_Taxo<br/>n_347</i>      | 0   | 0   | 0   | 0   | 0   | 0   | 0 | 0   | 0   | 0   | 0   | 0   | 0   | 0   | 0   | 0.1 | 0   | 0   | 0   | 0   | 0.1 | 0   | 0 | 0   |
| <b>GGT53;<br/>HOT701</b>        | <i>Actinomyces<br/>odontolyticus</i>              | 0   | 0   | 0.2 | 0.1 | 0.2 | 0.1 | 0 | 0.2 | 0.1 | 0   | 0.1 | 0.1 | 0   | 0.1 | 0.1 | 0.1 | 0   | 0   | 0   | 0   | 0.1 | 0.1 | 0 | 0   |
| <b>GGT102<br/>2;HOT8<br/>17</b> | <i>Lactobacillus<br/>crispatus</i>                | 0   | 0   | 0   | 0   | 0   | 0   | 0 | 0   | 0   | 0   | 0.2 | 0   | 0   | 0   | 0   | 0   | 0   | 0   | 0   | 0   | 0   | 0   | 0 | 0   |
| <b>HOT074</b>                   | <i>Streptococcus<br/>sp._Oral_Taxo<br/>n_074</i>  | 0   | 0   | 0   | 0.1 | 0   | 0.2 | 0 | 0.1 | 0   | 0   | 0   | 0.1 | 0   | 0   | 0   | 0   | 0.1 | 0.1 | 0.1 | 0.2 | 0   | 0   | 0 | 0   |
| <b>GGT706<br/>;HOT57<br/>7</b>  | <i>Eikenella<br/>corrodens</i>                    | 0   | 0   | 0   | 0   | 0   | 0.1 | 0 | 0   | 0   | 0   | 0.1 | 0.2 | 0   | 0.1 | 0   | 0.1 | 0   | 0.1 | 0   | 0   | 0   | 0   | 0 | 0   |
| <b>GGT711</b>                   | <i>Enterobacter<br/>cloacae</i>                   | 0   | 0   | 0   | 0   | 0   | 0   | 0 | 0   | 0   | 0   | 0.1 | 0.1 | 0.1 | 0   | 0   | 0   | 0   | 0   | 0   | 0   | 0   | 0   | 0 | 0   |
| <b>GGT181<br/>1;HOT7<br/>21</b> | <i>Streptococcus<br/>parasanguinis<br/>_I</i>     | 0   | 0   | 0   | 0   | 0   | 0.1 | 0 | 0.6 | 0   | 0.1 | 0   | 0   | 0   | 0   | 0   | 0   | 0   | 0   | 0   | 0   | 0   | 0   | 0 | 0   |
| <b>HOTH27</b>                   | <i>Fusobacterium<br/>sp._Oral_Taxo<br/>n_H27</i>  | 0.2 | 0.2 | 0   | 0   | 0   | 0   | 0 | 0   | 0   | 0   | 0   | 0   | 0   | 0   | 0   | 0   | 0   | 0   | 0   | 0   | 0   | 0   | 0 | 0   |
| <b>HOT888</b>                   | <i>Actinomyces<br/>dentalis</i>                   | 0   | 0   | 0.1 | 0   | 0   | 0.1 | 0 | 0.1 | 0   | 0   | 0   | 0   | 0   | 0   | 0   | 0   | 0.1 | 0   | 0   | 0   | 0   | 0   | 0 | 0.1 |
| <b>GGT157</b>                   | <i>Ralstonia</i>                                  | 0   | 0   | 0   | 0   | 0   | 0   | 0 | 0   | 0   | 0   | 0.1 | 0   | 0   | 0   | 0   | 0   | 0   | 0   | 0   | 0   | 0   | 0   | 0 | 0   |

|                                 |                                                               |     |     |     |     |   |     |   |     |   |   |   |     |     |     |   |     |     |     |     |     |   |     |     |   |   |     |
|---------------------------------|---------------------------------------------------------------|-----|-----|-----|-----|---|-----|---|-----|---|---|---|-----|-----|-----|---|-----|-----|-----|-----|-----|---|-----|-----|---|---|-----|
| <b>0;HOT8<br/>54</b>            | <i>pickettii</i>                                              |     |     |     |     |   |     |   |     |   |   |   |     |     |     |   |     |     |     |     |     |   |     |     |   |   |     |
| <b>HOT351</b>                   | <i>TM7_[G-3]<br/>sp._Oral_Taxo<br/>n_351</i>                  | 0.6 | 0.4 | 0   | 0   | 0 | 0   | 0 | 0   | 0 | 0 | 0 | 0   | 0   | 0   | 0 | 0   | 0   | 0   | 0   | 0   | 0 | 0   | 0   | 0 | 0 | 0   |
| <b>HOT097</b>                   | <i>Moryella<br/>sp._Oral_Taxo<br/>n_097</i>                   | 0.1 | 0.1 | 0.2 | 0   | 0 | 0.1 | 0 | 0   | 0 | 0 | 0 | 0   | 0   | 0   | 0 | 0   | 0   | 0   | 0   | 0   | 0 | 0   | 0   | 0 | 0 | 0   |
| <b>HOT412</b>                   | <i>Capnocytopha<br/>ga<br/>sp._Oral_Taxo<br/>n_412</i>        | 0   | 0   | 0   | 0   | 0 | 0   | 0 | 0   | 0 | 0 | 0 | 0   | 0.9 | 0   | 0 | 0   | 0   | 0   | 0   | 0   | 0 | 0.3 | 0.4 | 0 | 0 | 0   |
| <b>HOT326</b>                   | <i>Capnocytopha<br/>ga<br/>sp._Oral_Taxo<br/>n_326</i>        | 0   | 0   | 0.1 | 0.1 | 0 | 0   | 0 | 0   | 0 | 0 | 0 | 0.3 | 0   | 0   | 0 | 0   | 0   | 0   | 0   | 0   | 0 | 0   | 0   | 0 | 0 | 0   |
| <b>GGT107<br/>4;HOT5<br/>63</b> | <i>Leptotrichia<br/>buccalis</i>                              | 0   | 0   | 0   | 0   | 0 | 0.1 | 0 | 0   | 0 | 0 | 0 | 0   | 0.3 | 0   | 0 | 0   | 0   | 0   | 0   | 0   | 0 | 0   | 0   | 0 | 0 | 0   |
| <b>GGT100<br/>0;HOT5<br/>82</b> | <i>Kingella<br/>denitrificans</i>                             | 0.1 | 0   | 0   | 0   | 0 | 0   | 0 | 0   | 0 | 0 | 0 | 0   | 0.4 | 0.1 | 0 | 0   | 0   | 0   | 0   | 0   | 0 | 0   | 0.1 | 0 | 0 | 0   |
| <b>HOT461</b>                   | <i>Lactobacillus<br/>sp._Oral_Taxo<br/>n_461</i>              | 0.1 | 1.3 | 0   | 0   | 0 | 0   | 0 | 0   | 0 | 0 | 0 | 0   | 0   | 0   | 0 | 0   | 0   | 0   | 0   | 0   | 0 | 0   | 0   | 0 | 0 | 0   |
| <b>HOTD12</b>                   | <i>Dietzia<br/>sp._Oral_Taxo<br/>n_D12</i>                    | 0   | 0   | 0   | 0   | 0 | 0   | 0 | 0   | 0 | 0 | 0 | 0   | 0   | 0   | 0 | 0   | 0   | 0   | 0   | 0   | 0 | 0   | 0   | 0 | 0 | 1.2 |
| <b>GGT208<br/>4;HOT1<br/>55</b> | <i>Veillonellacea<br/>e_[G-1]<br/>sp._Oral_Taxo<br/>n_155</i> | 0   | 0   | 0   | 0   | 0 | 0   | 0 | 0.1 | 0 | 0 | 0 | 0   | 0   | 0   | 0 | 0   | 0   | 0   | 0   | 0   | 0 | 0   | 0   | 0 | 0 | 0   |
| <b>GGT136<br/>1;HOT8<br/>07</b> | <i>Olsenella<br/>sp._Oral_Taxo<br/>n_807</i>                  | 0   | 0.1 | 0   | 0   | 0 | 0   | 0 | 0   | 0 | 0 | 0 | 0   | 0.5 | 0   | 0 | 0   | 0   | 0   | 0   | 0   | 0 | 0   | 0   | 0 | 0 | 0   |
| <b>HOT131</b>                   | <i>Mitsuokella<br/>sp._Oral_Taxo<br/>n_131</i>                | 0   | 0   | 0   | 0   | 0 | 0.1 | 0 | 0   | 0 | 0 | 0 | 0   | 0.1 | 0   | 0 | 0.1 | 0.1 | 0.2 | 0.1 | 0.1 | 0 | 0   | 0   | 0 | 0 | 0.3 |
| <b>GGT104<br/>1;HOT0<br/>51</b> | <i>Lactobacillus<br/>vaginalis</i>                            | 0   | 0   | 0   | 0   | 0 | 0   | 0 | 0   | 0 | 0 | 0 | 0   | 0   | 0   | 0 | 0   | 0   | 0   | 1   | 0.3 | 0 | 0   | 0   | 0 | 0 | 0   |
| <b>HOT336</b>                   | <i>Capnocytopha<br/>ga<br/>sp._Oral_Taxo</i>                  | 0   | 0   | 0.1 | 0.1 | 0 | 0.1 | 0 | 0   | 0 | 0 | 0 | 0   | 0.3 | 0   | 0 | 0   | 0   | 0.2 | 0   | 0   | 0 | 0   | 0   | 0 | 0 | 0   |

|                         | <i>n_336</i>                             |     |     |     |     |     |     |     |     |     |     |     |     |     |     |   |     |     |     |     |     |     |     |     |   |     |
|-------------------------|------------------------------------------|-----|-----|-----|-----|-----|-----|-----|-----|-----|-----|-----|-----|-----|-----|---|-----|-----|-----|-----|-----|-----|-----|-----|---|-----|
| <b>GGT136 2;HOT8 06</b> | <i>Olsenella profusa</i>                 | 0   | 0   | 0.2 | 0   | 0.3 | 0   | 0   | 0   | 0.1 | 0   | 0   | 0   | 0   | 0   | 0 | 0.1 | 0   | 0   | 0   | 0   | 0   | 0   | 0   | 0 | 0   |
| <b>GGT573 ;HOT57 9</b>  | <i>Cryptobacterium curtum</i>            | 0.1 | 0.3 | 0   | 0   | 0   | 0   | 0   | 0   | 0   | 0   | 0   | 0   | 0.1 | 0   | 0 | 0   | 0   | 0   | 0   | 0   | 0   | 0   | 0   | 0 | 0.2 |
| <b>GGT198 9;HOT5 24</b> | <i>Veillonella atypica</i>               | 0   | 0   | 0   | 0   | 0   | 0   | 0   | 0   | 0   | 0   | 0   | 0   | 0   | 0   | 0 | 0   | 0   | 0   | 0   | 0   | 0.4 | 0   | 0   | 0 | 0   |
| <b>HOT473</b>           | <i>Alloprevotella sp._Oral_Taxon_473</i> | 0   | 0.1 | 0   | 0   | 0   | 0.3 | 0   | 0   | 0   | 0   | 0   | 0   | 0   | 0   | 0 | 0   | 0   | 0   | 0   | 0   | 0   | 0   | 0   | 0 | 0   |
| <b>GGT181 8;HOT0 21</b> | <i>Streptococcus vestibularis</i>        | 0   | 0.2 | 0   | 0   | 0   | 0   | 0   | 0   | 0   | 0   | 0   | 0   | 0   | 0   | 0 | 0   | 0.6 | 0   | 0.1 | 0.2 | 0   | 0   | 0   | 0 | 0   |
| <b>HOTE78</b>           | <i>Streptococcus sp._Oral_Taxon_E78</i>  | 0   | 0   | 0   | 0   | 0   | 0   | 0.1 | 0   | 0   | 0.1 | 0.2 | 0.1 | 0   | 0   | 0 | 0   | 0   | 0   | 0   | 0   | 0.1 | 0   | 0   | 0 | 0   |
| <b>GGT806 ;HOT20 1</b>  | <i>Fusobacterium periodonticum</i>       | 0   | 0   | 0   | 0.1 | 0   | 0.2 | 0   | 0   | 0   | 0   | 0   | 0   | 0   | 0.1 | 0 | 0   | 0   | 0   | 0   | 0   | 0   | 0   | 0   | 0 | 0   |
| <b>GGT111 4;HOT1 22</b> | <i>Megasphaera micronuciformis</i>       | 0   | 0.1 | 0   | 0   | 0   | 0   | 0   | 0   | 0.1 | 0   | 0   | 0   | 0   | 0   | 0 | 0   | 0   | 0   | 0   | 0   | 0   | 0.1 | 0   | 0 | 0   |
| <b>HOT739</b>           | <i>Propionibacterium propionicum</i>     | 0   | 0   | 0   | 0   | 0   | 0   | 0   | 0   | 0   | 0   | 0   | 0   | 0   | 0   | 0 | 0.1 | 0.1 | 0   | 0   | 0   | 0.2 | 0.4 | 0   | 0 | 0   |
| <b>GGT813 ;HOT75 7</b>  | <i>Gemella sanguinis</i>                 | 0   | 0   | 0   | 0.1 | 0   | 0.1 | 0   | 0.1 | 0   | 0   | 0   | 0   | 0   | 0   | 0 | 0   | 0   | 0   | 0   | 0   | 0   | 0   | 0   | 0 | 0   |
| <b>HOT660</b>           | <i>Defluviobacter lusatiensis</i>        | 0   | 0   | 0   | 0   | 0   | 0   | 0   | 0   | 0   | 0   | 0   | 0   | 0   | 0   | 0 | 0   | 0   | 0   | 0   | 0   | 0   | 0   | 0   | 0 | 1.1 |
| <b>HOT057</b>           | <i>Streptococcus sp._Oral_Taxon_057</i>  | 0   | 0   | 0   | 0   | 0   | 0   | 0   | 0.1 | 0   | 0   | 0   | 0.2 | 0   | 0   | 0 | 0   | 0   | 0   | 0.1 | 0   | 0   | 0   | 0   | 0 | 0   |
| <b>GGT530 ;HOT59 5</b>  | <i>Corynebacterium durum</i>             | 0   | 0   | 0   | 0   | 0   | 0.1 | 0   | 0   | 0   | 0   | 0   | 0   | 0   | 0   | 0 | 0   | 0   | 0   | 0   | 0   | 0   | 0   | 0.2 | 0 | 0   |
| <b>HOT324</b>           | <i>Capnocytophaga sp._Oral_Taxon_324</i> | 0   | 0   | 0.2 | 0.1 | 0   | 0   | 0   | 0   | 0   | 0   | 0   | 0   | 0   | 0.1 | 0 | 0   | 0   | 0.1 | 0   | 0   | 0   | 0   | 0   | 0 | 0   |
| <b>GGT175</b>           | <i>Staphylococcus</i>                    | 0   | 0   | 0   | 0   | 0   | 0   | 0   | 0   | 0   | 0   | 0   | 0   | 0   | 0   | 0 | 0   | 0   | 0   | 0   | 0   | 0   | 0   | 0   | 0 | 0   |

|                                 |                                                               |     |     |     |     |     |     |     |     |     |     |     |     |     |     |   |   |     |   |     |   |     |     |   |     |
|---------------------------------|---------------------------------------------------------------|-----|-----|-----|-----|-----|-----|-----|-----|-----|-----|-----|-----|-----|-----|---|---|-----|---|-----|---|-----|-----|---|-----|
| <b>8</b>                        | <i>s equorum</i>                                              |     |     |     |     |     |     |     |     |     |     |     |     |     |     |   |   |     |   |     |   |     |     |   |     |
| <b>GGT136<br/>7;HOT4<br/>57</b> | <i>Oribacterium<br/>sinus</i>                                 | 0   | 0   | 0.1 | 0.1 | 0   | 0   | 0   | 0.1 | 0   | 0   | 0   | 0   | 0   | 0   | 0 | 0 | 0   | 0 | 0   | 0 | 0.1 | 0   | 0 | 0.1 |
| <b>HOTA58</b>                   | <i>Acinetobacter<br/>sp._Oral_Taxo<br/>n_A58</i>              | 0   | 0   | 0   | 0   | 0   | 0   | 0   | 0   | 0   | 0   | 0   | 0   | 0   | 0   | 0 | 0 | 0   | 0 | 0   | 0 | 0   | 0   | 0 |     |
| <b>GGT160<br/>8</b>             | <i>Riemerella<br/>anatipestifer</i>                           | 0   | 0   | 0   | 0   | 0   | 0   | 0   | 0   | 0   | 0   | 0   | 0   | 0   | 0   | 0 | 0 | 0   | 0 | 0   | 0 | 0   | 0   | 0 |     |
| <b>HOT870</b>                   | <i>TM7_[G-1]<br/>sp._Oral_Taxo<br/>n_870</i>                  | 0   | 0   | 0   | 0   | 0   | 0   | 0   | 0   | 0   | 0   | 0   | 0   | 0   | 0   | 0 | 0 | 0   | 0 | 0   | 0 | 0   | 0   | 0 |     |
| <b>HOT278</b>                   | <i>Porphyromon<br/>as<br/>sp._Oral_Taxo<br/>n_278</i>         | 0   | 0   | 0   | 0   | 0   | 0.7 | 0   | 0   | 0   | 0   | 0   | 0   | 0   | 0   | 0 | 0 | 0   | 0 | 0   | 0 | 0   | 0   | 0 |     |
| <b>HOTA88</b>                   | <i>Pseudomonas<br/>mosselii_Oral<br/>Taxon_A88</i>            | 0   | 0   | 0   | 0   | 0   | 0   | 0   | 0   | 0   | 0   | 0.5 | 0   | 0   | 0   | 0 | 0 | 0   | 0 | 0   | 0 | 0   | 0   | 0 |     |
| <b>GGT130<br/>4;HOT5<br/>98</b> | <i>Neisseria<br/>elongata</i>                                 | 0   | 0   | 0   | 0   | 0   | 0.1 | 0   | 0   | 0   | 0   | 0   | 0   | 0.2 | 0.1 | 0 | 0 | 0   | 0 | 0   | 0 | 0   | 0   | 0 |     |
| <b>HOT078</b>                   | <i>Oribacterium<br/>sp._Oral_Taxo<br/>n_078</i>               | 0.5 | 0.1 | 0   | 0   | 0   | 0   | 0   | 0   | 0   | 0   | 0   | 0   | 0   | 0   | 0 | 0 | 0   | 0 | 0   | 0 | 0.1 | 0   | 0 |     |
| <b>HOT352</b>                   | <i>TM7_[G-1]<br/>sp._Oral_Taxo<br/>n_352</i>                  | 0   | 0   | 0   | 0   | 0   | 0   | 0   | 0.1 | 0   | 0   | 0   | 0   | 0   | 0   | 0 | 0 | 0   | 0 | 0   | 0 | 0   | 0   | 0 |     |
| <b>GGT148<br/>8;HOT2<br/>99</b> | <i>Prevotella<br/>sp._Oral_Taxo<br/>n_299</i>                 | 0   | 0   | 0.1 | 0.1 | 0.1 | 0.1 | 0   | 0   | 0   | 0   | 0   | 0   | 0   | 0   | 0 | 0 | 0   | 0 | 0   | 0 | 0   | 0.1 | 0 |     |
| <b>HOT308</b>                   | <i>Alloprevotella<br/>sp._Oral_Taxo<br/>n_308</i>             | 0   | 0   | 0   | 0   | 0   | 0.1 | 0   | 0   | 0   | 0   | 0   | 0.1 | 0   | 0   | 0 | 0 | 0   | 0 | 0   | 0 | 0.1 | 0.1 | 0 |     |
| <b>GGT153<br/>6;HOT6<br/>12</b> | <i>Pseudomonas<br/>fluorescens</i>                            | 0   | 0   | 0   | 0   | 0   | 0   | 0   | 0   | 0   | 0   | 0   | 0   | 0.1 | 0   | 0 | 0 | 0   | 0 | 0.2 | 0 | 0   | 0   | 0 |     |
| <b>GGT182<br/>0</b>             | <i>Streptococcus<br/>sp._str._M334</i>                        | 0   | 0   | 0   | 0   | 0   | 0   | 0.3 | 0   | 0.1 | 0.1 | 0   | 0   | 0   | 0   | 0 | 0 | 0.1 | 0 | 0   | 0 | 0   | 0   | 0 |     |
| <b>HOT096</b>                   | <i>Lachnospirace<br/>ae_[G-2]<br/>sp._Oral_Taxo<br/>n_096</i> | 0   | 0   | 0.5 | 0.1 | 0   | 0   | 0   | 0   | 0   | 0   | 0   | 0   | 0   | 0   | 0 | 0 | 0   | 0 | 0   | 0 | 0   | 0   | 0 |     |
| <b>GGT149</b>                   | <i>Prevotella</i>                                             | 0.4 | 0   | 0   | 0   | 0   | 0   | 0   | 0   | 0   | 0   | 0   | 0   | 0   | 0   | 0 | 0 | 0   | 0 | 0   | 0 | 0   | 0   | 0 |     |

|                       |                                                    |     |     |     |     |   |     |   |   |   |   |     |     |     |     |     |   |   |   |     |     |     |     |     |   |   |
|-----------------------|----------------------------------------------------|-----|-----|-----|-----|---|-----|---|---|---|---|-----|-----|-----|-----|-----|---|---|---|-----|-----|-----|-----|-----|---|---|
| <b>0;HOT289</b>       | <i>maculosa</i>                                    |     |     |     |     |   |     |   |   |   |   |     |     |     |     |     |   |   |   |     |     |     |     |     |   |   |
| <b>GGT1498;HOT466</b> | <i>Alloprevotella tannerae</i>                     | 0   | 0   | 0   | 0   | 0 | 0   | 0 | 0 | 0 | 0 | 0   | 0   | 0   | 0   | 0   | 0 | 0 | 0 | 0   | 0   | 0   | 0   | 0   | 0 | 0 |
| <b>GGT1043;HOT756</b> | <i>Lactobacillus salivarius</i>                    | 0   | 0   | 0   | 0   | 0 | 0   | 0 | 0 | 0 | 0 | 0   | 0   | 0   | 0   | 0   | 0 | 0 | 0 | 0.3 | 0.2 | 0   | 0   | 0   | 0 | 0 |
| <b>GGT33</b>          | <i>Acinetobacter sp._str._DR1</i>                  | 0   | 0   | 0   | 0   | 0 | 0   | 0 | 0 | 0 | 0 | 0   | 0   | 0   | 0   | 0   | 0 | 0 | 0 | 0   | 0   | 0   | 0   | 0   | 0 | 0 |
| <b>GGT1077;HOT214</b> | <i>Leptotrichia shahii</i>                         | 0   | 0   | 0   | 0   | 0 | 0   | 0 | 0 | 0 | 0 | 0   | 0   | 0   | 0   | 0   | 0 | 0 | 0 | 0   | 0   | 0   | 0   | 0   | 0 | 0 |
| <b>GGT380;HOT763</b>  | <i>Campylobacter showae</i>                        | 0   | 0   | 0   | 0   | 0 | 0   | 0 | 0 | 0 | 0 | 0   | 0.1 | 0.1 | 0   | 0   | 0 | 0 | 0 | 0   | 0   | 0   | 0   | 0   | 0 | 0 |
| <b>HOT107</b>         | <i>Lachnoanaerobaculum umeaense</i>                | 0.1 | 0.1 | 0.1 | 0   | 0 | 0   | 0 | 0 | 0 | 0 | 0   | 0   | 0.1 | 0   | 0   | 0 | 0 | 0 | 0   | 0   | 0   | 0   | 0   | 0 | 0 |
| <b>HOT221</b>         | <i>Leptotrichia sp._Oral_Taxonomy_221</i>          | 0   | 0   | 0.1 | 0.2 | 0 | 0   | 0 | 0 | 0 | 0 | 0   | 0   | 0   | 0.1 | 0   | 0 | 0 | 0 | 0   | 0   | 0.1 | 0.1 | 0.1 | 0 | 0 |
| <b>HOT349</b>         | <i>TM7_[G-1] sp._Oral_Taxonomy_349</i>             | 0   | 0   | 0   | 0   | 0 | 0   | 0 | 0 | 0 | 0 | 0   | 0   | 0   | 0   | 0   | 0 | 0 | 0 | 0   | 0   | 0   | 0   | 0   | 0 | 0 |
| <b>HOTE20</b>         | <i>Selenomonas sp._Oral_Taxonomy_E20</i>           | 0   | 0   | 0   | 0   | 0 | 0   | 0 | 0 | 0 | 0 | 0   | 0   | 0   | 0   | 0   | 0 | 0 | 0 | 0   | 0   | 0   | 0   | 0   | 0 | 0 |
| <b>HOT100</b>         | <i>Lachnospiraceae_[G-3] sp._Oral_Taxonomy_100</i> | 0   | 0   | 0   | 0   | 0 | 0   | 0 | 0 | 0 | 0 | 0   | 0   | 0.1 | 0   | 0   | 0 | 0 | 0 | 0   | 0   | 0   | 0   | 0   | 0 | 0 |
| <b>HOT887</b>         | <i>Veillonella denticariosi</i>                    | 0   | 0   | 0   | 0   | 0 | 0   | 0 | 0 | 0 | 0 | 0   | 0   | 0   | 0   | 0   | 0 | 0 | 0 | 0   | 0   | 0   | 0   | 0   | 0 | 0 |
| <b>HOT215</b>         | <i>Leptotrichia sp._Oral_Taxonomy_215</i>          | 0   | 0   | 0.1 | 0   | 0 | 0.1 | 0 | 0 | 0 | 0 | 0   | 0   | 0   | 0   | 0   | 0 | 0 | 0 | 0   | 0   | 0   | 0   | 0   | 0 | 0 |
| <b>GGT1034</b>        | <i>Lactobacillus helveticus</i>                    | 0   | 0   | 0   | 0   | 0 | 0   | 0 | 0 | 0 | 0 | 0.1 | 0   | 0   | 0   | 0   | 0 | 0 | 0 | 0   | 0   | 0   | 0   | 0   | 0 | 0 |
| <b>HOT900</b>         | <i>Bergeyella sp._Oral_Taxonomy_900</i>            | 0   | 0   | 0   | 0   | 0 | 0   | 0 | 0 | 0 | 0 | 0   | 0   | 0.2 | 0   | 0   | 0 | 0 | 0 | 0   | 0   | 0   | 0   | 0   | 0 | 0 |
| <b>GGT803;HOT20</b>   | <i>Fusobacterium</i>                               | 0   | 0   | 0   | 0   | 0 | 0   | 0 | 0 | 0 | 0 | 0   | 0   | 0   | 0   | 0.3 | 0 | 0 | 0 | 0   | 0   | 0   | 0   | 0   | 0 | 0 |

|                       |                                           |     |     |   |   |   |     |   |     |   |   |     |     |     |     |     |     |   |   |   |   |   |   |   |   |     |
|-----------------------|-------------------------------------------|-----|-----|---|---|---|-----|---|-----|---|---|-----|-----|-----|-----|-----|-----|---|---|---|---|---|---|---|---|-----|
| <b>0</b>              | <i>nucleatum_ss_vincentii</i>             |     |     |   |   |   |     |   |     |   |   |     |     |     |     |     |     |   |   |   |   |   |   |   |   |     |
| <b>HOT323</b>         | <i>Capnocytophaga sp._Oral_Taxon_323</i>  | 0   | 0   | 0 | 0 | 0 | 0   | 0 | 0   | 0 | 0 | 0   | 0   | 0   | 0   | 0   | 0   | 0 | 0 | 0 | 0 | 0 | 0 | 0 | 0 | 0   |
| <b>HOTE63</b>         | <i>Actinomyces sp._Oral_Taxon_E63</i>     | 0   | 0   | 0 | 0 | 0 | 0.2 | 0 | 0   | 0 | 0 | 0   | 0   | 0   | 0   | 0   | 0   | 0 | 0 | 0 | 0 | 0 | 0 | 0 | 0 | 0   |
| <b>HOT913</b>         | <i>Alloprevotella sp._Oral_Taxon_913</i>  | 0   | 0   | 0 | 0 | 0 | 0   | 0 | 0   | 0 | 0 | 0   | 0   | 0   | 0   | 0   | 0   | 0 | 0 | 0 | 0 | 0 | 0 | 0 | 0 | 0   |
| <b>HOT886</b>         | <i>Streptococcus oligofermentans</i>      | 0   | 0   | 0 | 0 | 0 | 0   | 0 | 0   | 0 | 0 | 0   | 0   | 0.4 | 0   | 0   | 0   | 0 | 0 | 0 | 0 | 0 | 0 | 0 | 0 | 0   |
| <b>HOT423</b>         | <i>Streptococcus sp._Oral_Taxon_423</i>   | 0   | 0   | 0 | 0 | 0 | 0   | 0 | 0   | 0 | 0 | 0   | 0   | 0   | 0   | 0   | 0.1 | 0 | 0 | 0 | 0 | 0 | 0 | 0 | 0 | 0   |
| <b>GGT1813</b>        | <i>Streptococcus sp._Oral_Taxon_71</i>    | 0   | 0   | 0 | 0 | 0 | 0   | 0 | 0   | 0 | 0 | 0   | 0   | 0   | 0   | 0.1 | 0   | 0 | 0 | 0 | 0 | 0 | 0 | 0 | 0 | 0   |
| <b>HOT181</b>         | <i>Actinomyces sp._Oral_Taxon_181</i>     | 0   | 0   | 0 | 0 | 0 | 0.1 | 0 | 0.1 | 0 | 0 | 0   | 0   | 0   | 0   | 0   | 0   | 0 | 0 | 0 | 0 | 0 | 0 | 0 | 0 | 0   |
| <b>HOTE28</b>         | <i>Streptococcus sp._Oral_Taxon_E28</i>   | 0   | 0   | 0 | 0 | 0 | 0   | 0 | 0   | 0 | 0 | 0   | 0   | 0   | 0   | 0   | 0   | 0 | 0 | 0 | 0 | 0 | 0 | 0 | 0 | 0   |
| <b>HOTH23</b>         | <i>Selenomonas sp._Oral_Taxon_H23</i>     | 0   | 0   | 0 | 0 | 0 | 0   | 0 | 0   | 0 | 0 | 0   | 0   | 0   | 0   | 0   | 0   | 0 | 0 | 0 | 0 | 0 | 0 | 0 | 0 | 0   |
| <b>HOT769</b>         | <i>Treponema socranskii_ss_socranskii</i> | 0.2 | 0.1 | 0 | 0 | 0 | 0   | 0 | 0   | 0 | 0 | 0   | 0   | 0   | 0   | 0   | 0   | 0 | 0 | 0 | 0 | 0 | 0 | 0 | 0 | 0   |
| <b>HOT874</b>         | <i>SR1_[G-1] sp._Oral_Taxon_874</i>       | 0   | 0   | 0 | 0 | 0 | 0   | 0 | 0   | 0 | 0 | 0   | 0   | 0   | 0   | 0   | 0   | 0 | 0 | 0 | 0 | 0 | 0 | 0 | 0 | 0   |
| <b>GGT387;HOT700</b>  | <i>Capnocytophaga ochracea</i>            | 0   | 0   | 0 | 0 | 0 | 0   | 0 | 0   | 0 | 0 | 0.1 | 0.3 | 0   | 0.1 | 0   | 0   | 0 | 0 | 0 | 0 | 0 | 0 | 0 | 0 | 0   |
| <b>GGT1676;HOT151</b> | <i>Selenomonas sputigena</i>              | 0.1 | 0   | 0 | 0 | 0 | 0   | 0 | 0   | 0 | 0 | 0   | 0   | 0   | 0   | 0   | 0   | 0 | 0 | 0 | 0 | 0 | 0 | 0 | 0 | 0.1 |
| <b>GGT1479;HOT7</b>   | <i>Prevotella multisacchariv</i>          | 0   | 0   | 0 | 0 | 0 | 0   | 0 | 0   | 0 | 0 | 0   | 0   | 0   | 0   | 0   | 0   | 0 | 0 | 0 | 0 | 0 | 0 | 0 | 0 | 0   |

|                                 |                                                         |     |     |   |   |   |     |     |     |   |     |     |     |   |   |   |   |   |   |   |   |   |   |     |   |     |
|---------------------------------|---------------------------------------------------------|-----|-----|---|---|---|-----|-----|-----|---|-----|-----|-----|---|---|---|---|---|---|---|---|---|---|-----|---|-----|
| <b>94</b>                       | <i>orax</i>                                             |     |     |   |   |   |     |     |     |   |     |     |     |   |   |   |   |   |   |   |   |   |   |     |   |     |
| <b>GGT182<br/>1;HOT7<br/>28</b> | <i>Streptococcus<br/>peroris</i>                        | 0   | 0   | 0 | 0 | 0 | 0.1 | 0   | 0   | 0 | 0   | 0   | 0   | 0 | 0 | 0 | 0 | 0 | 0 | 0 | 0 | 0 | 0 | 0   | 0 | 0   |
| <b>GGT143<br/>2;HOT1<br/>11</b> | <i>Parvimonas<br/>micra</i>                             | 0.3 | 0   | 0 | 0 | 0 | 0   | 0   | 0   | 0 | 0   | 0   | 0   | 0 | 0 | 0 | 0 | 0 | 0 | 0 | 0 | 0 | 0 | 0   | 0 | 0   |
| <b>GGT130<br/>2;HOT7<br/>29</b> | <i>Neisseria<br/>pharyngis</i>                          | 0   | 0   | 0 | 0 | 0 | 0   | 0   | 0   | 0 | 0   | 0   | 0   | 0 | 0 | 0 | 0 | 0 | 0 | 0 | 0 | 0 | 0 | 0   | 0 | 0   |
| <b>HOT487</b>                   | <i>Streptococcus<br/>sp._Oral_Taxo<br/>n_487</i>        | 0   | 0   | 0 | 0 | 0 | 0.1 | 0   | 0   | 0 | 0   | 0   | 0   | 0 | 0 | 0 | 0 | 0 | 0 | 0 | 0 | 0 | 0 | 0   | 0 | 0   |
| <b>HOT808</b>                   | <i>Tannerella<br/>sp._Oral_Taxo<br/>n_808</i>           | 0.1 | 0   | 0 | 0 | 0 | 0   | 0   | 0   | 0 | 0   | 0   | 0   | 0 | 0 | 0 | 0 | 0 | 0 | 0 | 0 | 0 | 0 | 0   | 0 | 0   |
| <b>HOTA16</b>                   | <i>Corynebacteri<br/>um<br/>sp._Oral_Taxo<br/>n_A16</i> | 0   | 0   | 0 | 0 | 0 | 0   | 0.1 | 0.1 | 0 | 0   | 0   | 0   | 0 | 0 | 0 | 0 | 0 | 0 | 0 | 0 | 0 | 0 | 0.1 | 0 | 0   |
| <b>HOT565</b>                   | <i>Enterobacter<br/>cancerogenus</i>                    | 0   | 0   | 0 | 0 | 0 | 0   | 0   | 0   | 0 | 0   | 0.1 | 0   | 0 | 0 | 0 | 0 | 0 | 0 | 0 | 0 | 0 | 0 | 0   | 0 | 0   |
| <b>GGT103<br/>7;HOT8<br/>18</b> | <i>Lactobacillus<br/>reuteri</i>                        | 0   | 0   | 0 | 0 | 0 | 0   | 0   | 0   | 0 | 0   | 0   | 0   | 0 | 0 | 0 | 0 | 0 | 0 | 0 | 0 | 0 | 0 | 0   | 0 | 0   |
| <b>GGT306</b>                   | <i>Brevibacillus<br/>brevis</i>                         | 0   | 0   | 0 | 0 | 0 | 0   | 0   | 0   | 0 | 0   | 0.1 | 0   | 0 | 0 | 0 | 0 | 0 | 0 | 0 | 0 | 0 | 0 | 0   | 0 | 0   |
| <b>HOT914</b>                   | <i>Alloprevotella<br/>sp._Oral_Taxo<br/>n_914</i>       | 0   | 0   | 0 | 0 | 0 | 0.1 | 0   | 0   | 0 | 0   | 0   | 0   | 0 | 0 | 0 | 0 | 0 | 0 | 0 | 0 | 0 | 0 | 0   | 0 | 0   |
| <b>HOT225</b>                   | <i>Leptotrichia<br/>sp._Oral_Taxo<br/>n_225</i>         | 0   | 0   | 0 | 0 | 0 | 0   | 0   | 0   | 0 | 0.1 | 0   | 0   | 0 | 0 | 0 | 0 | 0 | 0 | 0 | 0 | 0 | 0 | 0.1 | 0 | 0   |
| <b>HOT203</b>                   | <i>Fusobacteriu<br/>m<br/>sp._Oral_Taxo<br/>n_203</i>   | 0   | 0.1 | 0 | 0 | 0 | 0   | 0   | 0   | 0 | 0   | 0   | 0   | 0 | 0 | 0 | 0 | 0 | 0 | 0 | 0 | 0 | 0 | 0   | 0 | 0   |
| <b>HOTG67</b>                   | <i>Selenomonas<br/>sp._Oral_Taxo<br/>n_G67</i>          | 0   | 0   | 0 | 0 | 0 | 0   | 0   | 0   | 0 | 0   | 0   | 0.2 | 0 | 0 | 0 | 0 | 0 | 0 | 0 | 0 | 0 | 0 | 0   | 0 | 0   |
| <b>GGT10;<br/>HOT343</b>        | <i>Achromobacte<br/>r xylooxidans</i>                   | 0   | 0   | 0 | 0 | 0 | 0   | 0   | 0   | 0 | 0   | 0   | 0   | 0 | 0 | 0 | 0 | 0 | 0 | 0 | 0 | 0 | 0 | 0   | 0 | 0.3 |
| <b>HOTF11</b>                   | <i>Streptococcus<br/>sp._Oral_Taxo</i>                  | 0   | 0   | 0 | 0 | 0 | 0   | 0   | 0   | 0 | 0   | 0   | 0   | 0 | 0 | 0 | 0 | 0 | 0 | 0 | 0 | 0 | 0 | 0   | 0 | 0   |

|                                 | <i>n_F11</i>                                                    |     |     |   |     |   |     |   |     |     |     |   |   |   |     |     |   |   |   |   |   |   |     |     |   |     |
|---------------------------------|-----------------------------------------------------------------|-----|-----|---|-----|---|-----|---|-----|-----|-----|---|---|---|-----|-----|---|---|---|---|---|---|-----|-----|---|-----|
| <b>GGT102<br/>6;HOT7<br/>49</b> | <i>Lactobacillus<br/>rhamnosus</i>                              | 0   | 0   | 0 | 0   | 0 | 0   | 0 | 0   | 0   | 0   | 0 | 0 | 0 | 0   | 0   | 0 | 0 | 0 | 0 | 0 | 0 | 0   | 0   | 0 | 0   |
| <b>GGT76;<br/>HOT762</b>        | <i>Aggregatibact<br/>er segnis</i>                              | 0   | 0   | 0 | 0   | 0 | 0   | 0 | 0   | 0   | 0   | 0 | 0 | 0 | 0.1 | 0   | 0 | 0 | 0 | 0 | 0 | 0 | 0   | 0   | 0 | 0   |
| <b>GGT863<br/>;HOT85<br/>1</b>  | <i>Haemophilus<br/>haemolyticus</i>                             | 0   | 0   | 0 | 0   | 0 | 0.1 | 0 | 0   | 0   | 0   | 0 | 0 | 0 | 0   | 0   | 0 | 0 | 0 | 0 | 0 | 0 | 0   | 0   | 0 | 0   |
| <b>HOT912</b>                   | <i>Alloprevotella<br/>sp._Oral_Taxo<br/>n_912</i>               | 0   | 0   | 0 | 0   | 0 | 0   | 0 | 0   | 0   | 0   | 0 | 0 | 0 | 0   | 0   | 0 | 0 | 0 | 0 | 0 | 0 | 0   | 0   | 0 | 0   |
| <b>HOT557</b>                   | <i>Eubacterium_<br/>[X1][G-3]<br/>brachy</i>                    | 0.2 | 0.1 | 0 | 0   | 0 | 0   | 0 | 0   | 0   | 0   | 0 | 0 | 0 | 0   | 0   | 0 | 0 | 0 | 0 | 0 | 0 | 0   | 0   | 0 | 0   |
| <b>HOTC21</b>                   | <i>Kingella<br/>sp._Oral_Taxo<br/>n_C21</i>                     | 0   | 0   | 0 | 0   | 0 | 0   | 0 | 0   | 0   | 0   | 0 | 0 | 0 | 0   | 0   | 0 | 0 | 0 | 0 | 0 | 0 | 0.1 | 0.2 | 0 | 0   |
| <b>GGT2;H<br/>OT165</b>         | <i>Catonella<br/>morbi</i>                                      | 0.1 | 0   | 0 | 0   | 0 | 0   | 0 | 0   | 0   | 0   | 0 | 0 | 0 | 0   | 0   | 0 | 0 | 0 | 0 | 0 | 0 | 0   | 0   | 0 | 0   |
| <b>HOT306</b>                   | <i>Prevotella<br/>sp._Oral_Taxo<br/>n_306</i>                   | 0   | 0   | 0 | 0   | 0 | 0   | 0 | 0   | 0.1 | 0   | 0 | 0 | 0 | 0   | 0   | 0 | 0 | 0 | 0 | 0 | 0 | 0   | 0   | 0 | 0   |
| <b>GGT102<br/>0;HOT5<br/>68</b> | <i>Lactobacillus<br/>casei</i>                                  | 0   | 0   | 0 | 0   | 0 | 0   | 0 | 0   | 0   | 0   | 0 | 0 | 0 | 0   | 0.1 | 0 | 0 | 0 | 0 | 0 | 0 | 0   | 0   | 0 | 0   |
| <b>HOTE72</b>                   | <i>Streptococcus<br/>sp._Oral_Taxo<br/>n_E72</i>                | 0   | 0   | 0 | 0   | 0 | 0   | 0 | 0   | 0   | 0   | 0 | 0 | 0 | 0   | 0   | 0 | 0 | 0 | 0 | 0 | 0 | 0   | 0   | 0 | 0   |
| <b>HOT075</b>                   | <i>Clostridiales_<br/>F-2][G-1]<br/>sp._Oral_Taxo<br/>n_075</i> | 0.1 | 0   | 0 | 0.1 | 0 | 0   | 0 | 0   | 0   | 0   | 0 | 0 | 0 | 0   | 0   | 0 | 0 | 0 | 0 | 0 | 0 | 0   | 0   | 0 | 0   |
| <b>GGT153<br/>4;HOT5<br/>36</b> | <i>Pseudomonas<br/>aeruginosa</i>                               | 0   | 0   | 0 | 0   | 0 | 0   | 0 | 0   | 0   | 0   | 0 | 0 | 0 | 0   | 0   | 0 | 0 | 0 | 0 | 0 | 0 | 0   | 0   | 0 | 0.2 |
| <b>HOTA56</b>                   | <i>TM7_[G]<br/>sp._Oral_Taxo<br/>n_A56</i>                      | 0   | 0   | 0 | 0   | 0 | 0   | 0 | 0.1 | 0   | 0   | 0 | 0 | 0 | 0   | 0   | 0 | 0 | 0 | 0 | 0 | 0 | 0   | 0   | 0 | 0   |
| <b>HOT124</b>                   | <i>Selenomonas<br/>artemidis</i>                                | 0   | 0   | 0 | 0   | 0 | 0   | 0 | 0   | 0   | 0   | 0 | 0 | 0 | 0   | 0   | 0 | 0 | 0 | 0 | 0 | 0 | 0   | 0   | 0 | 0   |
| <b>HOT865</b>                   | <i>Kluyvera<br/>ascorbata</i>                                   | 0   | 0   | 0 | 0   | 0 | 0   | 0 | 0   | 0   | 0   | 0 | 0 | 0 | 0   | 0   | 0 | 0 | 0 | 0 | 0 | 0 | 0   | 0   | 0 | 0   |
| <b>HOT305</b>                   | <i>Prevotella</i>                                               | 0   | 0   | 0 | 0   | 0 | 0   | 0 | 0   | 0   | 0.2 | 0 | 0 | 0 | 0   | 0   | 0 | 0 | 0 | 0 | 0 | 0 | 0   | 0   | 0 | 0   |



|                         |                                                    |     |     |     |   |   |     |   |   |   |   |   |     |   |   |   |   |   |   |   |   |   |   |   |     |
|-------------------------|----------------------------------------------------|-----|-----|-----|---|---|-----|---|---|---|---|---|-----|---|---|---|---|---|---|---|---|---|---|---|-----|
|                         | <i>sp._Oral_Taxon_305</i>                          |     |     |     |   |   |     |   |   |   |   |   |     |   |   |   |   |   |   |   |   |   |   |   |     |
| <b>HOT353</b>           | <i>TM7_[G-1] sp._Oral_Taxon_353</i>                | 0   | 0   | 0   | 0 | 0 | 0   | 0 | 0 | 0 | 0 | 0 | 0   | 0 | 0 | 0 | 0 | 0 | 0 | 0 | 0 | 0 | 0 | 0 | 0   |
| <b>HOTF93</b>           | <i>Lachnospiraceae_[G] sp._Oral_Taxon_F93</i>      | 0   | 0   | 0   | 0 | 0 | 0   | 0 | 0 | 0 | 0 | 0 | 0.2 | 0 | 0 | 0 | 0 | 0 | 0 | 0 | 0 | 0 | 0 | 0 | 0   |
| <b>GGT78; HOT485</b>    | <i>Agrobacterium tumefaciens</i>                   | 0   | 0   | 0   | 0 | 0 | 0   | 0 | 0 | 0 | 0 | 0 | 0   | 0 | 0 | 0 | 0 | 0 | 0 | 0 | 0 | 0 | 0 | 0 | 0.2 |
| <b>HOT303</b>           | <i>Prevotella pleuritidis</i>                      | 0   | 0   | 0   | 0 | 0 | 0   | 0 | 0 | 0 | 0 | 0 | 0   | 0 | 0 | 0 | 0 | 0 | 0 | 0 | 0 | 0 | 0 | 0 | 0   |
| <b>HOT121</b>           | <i>Anaeroglobus geminatus</i>                      | 0   | 0   | 0   | 0 | 0 | 0   | 0 | 0 | 0 | 0 | 0 | 0   | 0 | 0 | 0 | 0 | 0 | 0 | 0 | 0 | 0 | 0 | 0 | 0   |
| <b>HOT212</b>           | <i>Leptotrichia sp._Oral_Taxon_212</i>             | 0   | 0   | 0   | 0 | 0 | 0   | 0 | 0 | 0 | 0 | 0 | 0.1 | 0 | 0 | 0 | 0 | 0 | 0 | 0 | 0 | 0 | 0 | 0 | 0   |
| <b>HOT082</b>           | <i>Lachnoanaerobaculum orale</i>                   | 0   | 0   | 0.1 | 0 | 0 | 0   | 0 | 0 | 0 | 0 | 0 | 0   | 0 | 0 | 0 | 0 | 0 | 0 | 0 | 0 | 0 | 0 | 0 | 0   |
| <b>HOTA46</b>           | <i>Corynebacterium sp._Oral_Taxon_A46</i>          | 0   | 0   | 0   | 0 | 0 | 0.2 | 0 | 0 | 0 | 0 | 0 | 0   | 0 | 0 | 0 | 0 | 0 | 0 | 0 | 0 | 0 | 0 | 0 | 0   |
| <b>GGT172 3;HOT6 78</b> | <i>Solobacterium moorei</i>                        | 0   | 0   | 0   | 0 | 0 | 0   | 0 | 0 | 0 | 0 | 0 | 0   | 0 | 0 | 0 | 0 | 0 | 0 | 0 | 0 | 0 | 0 | 0 | 0   |
| <b>HOTC60</b>           | <i>Manihot esculenta_Oral_Taxon_C60</i>            | 0   | 0   | 0   | 0 | 0 | 0   | 0 | 0 | 0 | 0 | 0 | 0   | 0 | 0 | 0 | 0 | 0 | 0 | 0 | 0 | 0 | 0 | 0 | 0   |
| <b>HOTG62</b>           | <i>Streptococcus sp._Oral_Taxon_G62</i>            | 0   | 0   | 0   | 0 | 0 | 0   | 0 | 0 | 0 | 0 | 0 | 0   | 0 | 0 | 0 | 0 | 0 | 0 | 0 | 0 | 0 | 0 | 0 | 0.1 |
| <b>GGT147 8;HOT6 93</b> | <i>Prevotella nigrescens</i>                       | 0.1 | 0.1 | 0   | 0 | 0 | 0   | 0 | 0 | 0 | 0 | 0 | 0   | 0 | 0 | 0 | 0 | 0 | 0 | 0 | 0 | 0 | 0 | 0 | 0   |
| <b>HOT085</b>           | <i>Clostridiales_[F-2][G-2] sp._Oral_Taxon_085</i> | 0   | 0.1 | 0   | 0 | 0 | 0   | 0 | 0 | 0 | 0 | 0 | 0   | 0 | 0 | 0 | 0 | 0 | 0 | 0 | 0 | 0 | 0 | 0 | 0   |
| <b>GGT168 0;HOT1 49</b> | <i>Selenomonas sp._Oral_Taxon_149</i>              | 0   | 0   | 0   | 0 | 0 | 0   | 0 | 0 | 0 | 0 | 0 | 0   | 0 | 0 | 0 | 0 | 0 | 0 | 0 | 0 | 0 | 0 | 0 | 0   |

|                                 |                                               |     |     |   |     |   |   |   |   |   |   |   |   |   |     |   |   |   |   |   |   |   |   |   |   |   |     |
|---------------------------------|-----------------------------------------------|-----|-----|---|-----|---|---|---|---|---|---|---|---|---|-----|---|---|---|---|---|---|---|---|---|---|---|-----|
| <b>HOTG30</b>                   | <i>Veillonella sp._Oral_Taxon_G30</i>         | 0   | 0   | 0 | 0   | 0 | 0 | 0 | 0 | 0 | 0 | 0 | 0 | 0 | 0   | 0 | 0 | 0 | 0 | 0 | 0 | 0 | 0 | 0 | 0 | 0 | 0   |
| <b>GGT673<br/>;HOT73<br/>6</b>  | <i>Dialister pneumosintes</i>                 | 0   | 0   | 0 | 0   | 0 | 0 | 0 | 0 | 0 | 0 | 0 | 0 | 0 | 0   | 0 | 0 | 0 | 0 | 0 | 0 | 0 | 0 | 0 | 0 | 0 | 0   |
| <b>HOT414</b>                   | <i>Actinomyces sp._Oral_Taxon_414</i>         | 0   | 0   | 0 | 0.1 | 0 | 0 | 0 | 0 | 0 | 0 | 0 | 0 | 0 | 0   | 0 | 0 | 0 | 0 | 0 | 0 | 0 | 0 | 0 | 0 | 0 | 0   |
| <b>HOT781</b>                   | <i>Prevotella saccharolytica</i>              | 0   | 0   | 0 | 0   | 0 | 0 | 0 | 0 | 0 | 0 | 0 | 0 | 0 | 0   | 0 | 0 | 0 | 0 | 0 | 0 | 0 | 0 | 0 | 0 | 0 | 0   |
| <b>HOT671</b>                   | <i>Actinomyces meyeri</i>                     | 0   | 0.1 | 0 | 0   | 0 | 0 | 0 | 0 | 0 | 0 | 0 | 0 | 0 | 0   | 0 | 0 | 0 | 0 | 0 | 0 | 0 | 0 | 0 | 0 | 0 | 0   |
| <b>GGT724<br/>;HOT80<br/>3</b>  | <i>Enterococcus italicus</i>                  | 0   | 0   | 0 | 0   | 0 | 0 | 0 | 0 | 0 | 0 | 0 | 0 | 0 | 0   | 0 | 0 | 0 | 0 | 0 | 0 | 0 | 0 | 0 | 0 | 0 | 0   |
| <b>GGT149<br/>7;HOT6<br/>65</b> | <i>Prevotella marshii</i>                     | 0.1 | 0   | 0 | 0   | 0 | 0 | 0 | 0 | 0 | 0 | 0 | 0 | 0 | 0   | 0 | 0 | 0 | 0 | 0 | 0 | 0 | 0 | 0 | 0 | 0 | 0   |
| <b>GGT61;<br/>HOT178</b>        | <i>Actinomyces sp._Oral_Taxon_178</i>         | 0   | 0   | 0 | 0   | 0 | 0 | 0 | 0 | 0 | 0 | 0 | 0 | 0 | 0.1 | 0 | 0 | 0 | 0 | 0 | 0 | 0 | 0 | 0 | 0 | 0 | 0   |
| <b>GGT207<br/>6;HOT2<br/>74</b> | <i>Bacteroidales [G-2] sp._Oral_Taxon_274</i> | 0   | 0.1 | 0 | 0   | 0 | 0 | 0 | 0 | 0 | 0 | 0 | 0 | 0 | 0   | 0 | 0 | 0 | 0 | 0 | 0 | 0 | 0 | 0 | 0 | 0 | 0   |
| <b>HOTE05</b>                   | <i>Streptococcus sp._Oral_Taxon_E05</i>       | 0   | 0   | 0 | 0   | 0 | 0 | 0 | 0 | 0 | 0 | 0 | 0 | 0 | 0   | 0 | 0 | 0 | 0 | 0 | 0 | 0 | 0 | 0 | 0 | 0 | 0   |
| <b>HOT223</b>                   | <i>Leptotrichia sp._Oral_Taxon_223</i>        | 0.1 | 0   | 0 | 0   | 0 | 0 | 0 | 0 | 0 | 0 | 0 | 0 | 0 | 0   | 0 | 0 | 0 | 0 | 0 | 0 | 0 | 0 | 0 | 0 | 0 | 0   |
| <b>HOTE83</b>                   | <i>Selenomonas sp._Oral_Taxon_E83</i>         | 0   | 0   | 0 | 0   | 0 | 0 | 0 | 0 | 0 | 0 | 0 | 0 | 0 | 0   | 0 | 0 | 0 | 0 | 0 | 0 | 0 | 0 | 0 | 0 | 0 | 0.1 |
| <b>HOT069</b>                   | <i>Streptococcus sp._Oral_Taxon_069</i>       | 0   | 0   | 0 | 0   | 0 | 0 | 0 | 0 | 0 | 0 | 0 | 0 | 0 | 0   | 0 | 0 | 0 | 0 | 0 | 0 | 0 | 0 | 0 | 0 | 0 | 0   |
| <b>GGT179<br/>2</b>             | <i>Streptococcus thermophilus</i>             | 0   | 0   | 0 | 0   | 0 | 0 | 0 | 0 | 0 | 0 | 0 | 0 | 0 | 0   | 0 | 0 | 0 | 0 | 0 | 0 | 0 | 0 | 0 | 0 | 0 | 0   |
| <b>GGT765</b>                   | <i>Faecalibacterium prausnitzii</i>           | 0   | 0   | 0 | 0   | 0 | 0 | 0 | 0 | 0 | 0 | 0 | 0 | 0 | 0   | 0 | 0 | 0 | 0 | 0 | 0 | 0 | 0 | 0 | 0 | 0 | 0   |
| <b>HOT613</b>                   | <i>Tannerella forsythia</i>                   | 0   | 0   | 0 | 0   | 0 | 0 | 0 | 0 | 0 | 0 | 0 | 0 | 0 | 0   | 0 | 0 | 0 | 0 | 0 | 0 | 0 | 0 | 0 | 0 | 0 | 0   |



|               |                          |      |      |      |      |      |      |      |      |      |      |      |      |      |      |      |      |      |      |      |      |      |      |      |      |
|---------------|--------------------------|------|------|------|------|------|------|------|------|------|------|------|------|------|------|------|------|------|------|------|------|------|------|------|------|
| <b>HOT600</b> | <i>Prevotella enoeca</i> | 0    | 0    | 0    | 0    | 0    | 0    | 0    | 0    | 0    | 0    | 0    | 0    | 0    | 0    | 0    | 0    | 0    | 0    | 0    | 0    | 0    | 0    | 0    | C    |
|               | <b>Column Sum</b>        | 99.5 | 99.5 | 99.9 | 99.8 | 99.8 | 99.8 | 99.9 | 99.7 | 99.7 | 99.9 | 99.8 | 99.8 | 99.8 | 99.7 | 99.9 | 99.8 | 99.9 | 99.8 | 99.7 | 99.9 | 99.9 | 99.8 | 99.8 | 99.8 |
