# Supplementary material for: The oral bacterial microbiome of occlusal surfaces in children and its association with diet and caries
Source: PubMed Central journal article supplement (PMC5498058; doi:10.1371/journal.pone.0180621), 2017-07-05
Supplement: pone.0180621.s007.pdf [file pone.0180621.s007.pdf]

**The Oral Bacterial Microbiome of Occlusal Surfaces in Children and its Association with Diet And Caries**

**S5 Table: Microbiome diversity measures in each taxonomic level, by clinical diagnosis categories**

| Clinical diagnostic categories |       |                                                                                                                                                                                                                                                                                                                                                                                                                                                                                                                                                                                                  |                       |                      |                      |
|--------------------------------|-------|--------------------------------------------------------------------------------------------------------------------------------------------------------------------------------------------------------------------------------------------------------------------------------------------------------------------------------------------------------------------------------------------------------------------------------------------------------------------------------------------------------------------------------------------------------------------------------------------------|-----------------------|----------------------|----------------------|
|                                | Total |                                                                                                                                                                                                                                                                                                                                                                                                                                                                                                                                                                                                  | Sound                 | AWSL                 |                      |
| N                              | 46    |                                                                                                                                                                                                                                                                                                                                                                                                                                                                                                                                                                                                  | 22                    | 24                   |                      |
| α-diversity                    |       |                                                                                                                                                                                                                                                                                                                                                                                                                                                                                                                                                                                                  |                       |                      |                      |
|                                | Total | Dominant taxonomy <sup>a</sup> : RA variability (mRA <sub>std</sub> )                                                                                                                                                                                                                                                                                                                                                                                                                                                                                                                            | Sound Total (mean±SD) | AWSL Total (mean±SD) | p-value <sup>b</sup> |
| <b>Species</b>                 | 647   | <i>Granulicatella paradiacens</i> : 0.9-48.4% (16.5%±12.0)<br><i>Streptococcus mutans</i> : 0.0-55.2% (7.2%±10.5)<br><i>Streptococcus sp._str._C300</i> : 0.2-27.3% (6.2%±5.7)<br><i>Lautropia mirabilis</i> : 0.0-30.4% (4.2%±5.7)<br><i>Pseudomonas sp._Oral_Taxon_C61</i> : 0.0-47.2% (4.8%±12.2)<br><i>Streptococcus gordonii</i> : 0.0-21.5% (4.0%±4.8)<br><i>Streptococcus sanguinis</i> : 0.2-9.9 (3.1%±2.4)<br><i>Abiotrophia defectiva</i> : 0.0-54.7% (2.8%±8.3)<br><i>Streptococcus oralis</i> : 0.0-35.9% (2.7%±6.3)<br><i>Veillonella sp._Oral_Taxon_E53</i> : 0.0-14.2% (2.6%±2.8) | 571<br>(197.8±63.6)   | 594<br>(217.4±33.4)  | 0.19                 |
| <b>Genera</b>                  | 107   | <i>Streptococcus</i> : 3.5-79.5% (33.2%±18.6)<br><i>Granulicatella</i> : 1.0-50.0% (15.7%±12.9)<br><i>Klebsiella</i> : 0.0-81.1% (9.6%±19.6)<br><i>Pseudomonas</i> : 0.0-67.1% (5.6%±15.2)<br><i>Actinomyces</i> : 0.1-17.3% (3.8%±3.7)<br><i>Prevotella</i> : 0.0-43.4% (8.3%±3.6)<br><i>Veillonella</i> : 0.1-31.4% (5.7%±4.4)<br><i>Acinetobacter</i> : 0.0-76.2% (1.7%±11.1%)                                                                                                                                                                                                                | 65 (20.5±9.41)        | 61 (23.5±5.6)        | 0.19                 |
| <b>Families</b>                | 58    | <i>Streptococcaceae</i> : 3.5-79.5% (33.2%±18.6)<br><i>Carnobacteriaceae</i> : 1.0-50.0% (15.7%±12.9)<br><i>Enterobacteriaceae</i> : 0.0-86.3% (11.6%±22.6)<br><i>Pseudomonadaceae</i> : 0.0-67.5% (5.6%±15.2)<br><i>Veillonellaceae</i> : 0.1-31.5% (4.8%±5.8)<br><i>Actinomycetaceae</i> : 0.1-17.3% (4.0%±3.8)                                                                                                                                                                                                                                                                                | 38 (18.1±5.5)         | 30 (19.3±3.2)        | 0.36                 |
| <b>Orders</b>                  | 29    | <i>Lactobacillales</i> : 9.7-92.0% (52.3%±26.1)<br><i>Enterobacteriales</i> : 0.0-86.3% (11.6%±22.6)<br><i>Pseudomonadales</i> : 0.0-76.2% (7.3%±18.3)<br><i>Actinomycetales</i> : 0.1-19.8% (5.1%±4.4)<br><i>Clostridiales</i> : 0.1-31.8% (5.1%±5.9)<br><i>Bacteroidales</i> : 0.0-44.6% (4.7%±8.7).                                                                                                                                                                                                                                                                                           | 21 (12.1±3.2)         | 19 (13.0±1.9)        | 0.24                 |
| <b>Classes</b>                 | 25    | <i>Bacilli</i> : 9.7-92.0% (52.7%±26.1)<br><i>Gammaproteobacteria</i> : 0.0-86.3% (19.7%±29.5)<br><i>Betaproteobacteria</i> : 0.0-76.2% (7.3%±18.3)<br><i>Actinobacteria</i> : 0.1-19.8% (5.1%±4.4)<br><i>Bacteroides</i> : 0.0-44.6% (4.7%±8.7)                                                                                                                                                                                                                                                                                                                                                 | 15 (9.1±2.2)          | 11 (9.8±1.1)         | 0.14                 |
| <b>Phyla</b>                   | 11    | <i>Firmicutes</i> : 12.1-92.7 (57.8%±26.5)<br><i>Proteobacteria</i> : 1.3-87.1 (28.5%±28.0)<br><i>Actinobacteria</i> : 0.1-20.5 (5.7%±4.6)                                                                                                                                                                                                                                                                                                                                                                                                                                                       | 9 (6.0±1.1)           | 7 (6.8±0.6)          | <b>0.00</b>          |

|  |  |                                            |  |  |  |
|--|--|--------------------------------------------|--|--|--|
|  |  | <i>Bacteroidetes</i> : 0.0-51.7 (5.6%+9.6) |  |  |  |
|  |  | <i>Fusobacteria</i> : 0.0-13.3 (1.8%+3.0)  |  |  |  |

<sup>a</sup>Account for 99.4%; 91.9%; 86.1%; 74.9%; 76.6%; 53.3% of the distribution of Phylum, Class, Order, Family, Genus and Specie, respectively.

<sup>b</sup>*p*-value: Unpaired *t* test; 95% confidence interval. In bold, statically significant result.
